# Supplementary material for: Assessing the performance of a suite of machine learning models for daily river water temperature prediction
Source: PeerJ. 2019 Jun 4;7:e7065. doi: 10.7717/peerj.7065 (PMC6555394; doi:10.7717/peerj.7065)
Supplement: Dataset S1 [file peerj-07-7065-s001.xlsx]

## Sheet: Cedar River
Date	DOY	Tw	Q (m3/s)	Ta
2001-01-01	1	5.8	12.4311	5.55556
2001-01-02	2	6.3	11.7515	8.33333
2001-01-03	3	6.5	11.6382	7.22222
2001-01-04	4	7.4	16.3105	10
2001-01-05	5	7.5	18.321	7.77778
2001-01-06	6	6.4	13.5354	5
2001-01-07	7	6	12.0346	7.77778
2001-01-08	8	7	11.6382	6.66667
2001-01-09	9	6.2	10.9869	5
2001-01-10	10	6.8	10.5055	7.77778
2001-01-11	11	6.9	10.3073	7.77778
2001-01-12	12	7	10.1374	5.55556
2001-01-13	13	6.8	10.3073	3.88889
2001-01-14	14	6.3	10.5338	3.88889
2001-01-15	15	5.8	10.2224	2.22222
2001-01-16	16	4.7	10.0241	0.555556
2001-01-17	17	4.7	9.9392	1.11111
2001-01-18	18	6	10.1657	5
2001-01-19	19	6.4	10.0241	6.11111
2001-01-20	20	5.7	9.9392	6.11111
2001-01-21	21	6.3	11.2701	6.11111
2001-01-22	22	5.8	11.0436	6.66667
2001-01-23	23	5.9	10.4489	11.1111
2001-01-24	24	6.4	10.1657	6.11111
2001-01-25	25	6	9.99583	4.44444
2001-01-26	26	5.4	9.79761	5.55556
2001-01-27	27	4.6	9.79761	5.55556
2001-01-28	28	4.5	9.82593	2.22222
2001-01-29	29	5.5	10.0241	5.55556
2001-01-30	30	5.9	9.82593	5.55556
2001-01-31	31	6.5	9.7693	6.11111
2001-02-01	32	6	9.57108	6.11111
2001-02-02	33	6.8	9.99583	5.55556
2001-02-03	34	6.2	9.91088	5.55556
2001-02-04	35	6.7	12.9125	7.77778
2001-02-05	36	6.6	12.1762	5
2001-02-06	37	5.9	11.0436	2.77778
2001-02-07	38	4.3	10.6471	1.11111
2001-02-08	39	4.5	10.817	1.11111
2001-02-09	40	5	10.7038	5
2001-02-10	41	4.5	10.3356	3.88889
2001-02-11	42	4.7	10.2224	5
2001-02-12	43	4.4	10.0808	3.88889
2001-02-13	44	4.7	9.91088	3.33333
2001-02-14	45	4.6	9.68435	2.77778
2001-02-15	46	5.7	9.68435	2.77778
2001-02-16	47	4.8	10.4489	1.66667
2001-02-17	48	5.3	10.4206	5.55556
2001-02-18	49	6.4	10.3923	6.66667
2001-02-19	50	5.8	10.1091	6.11111
2001-02-20	51	5.7	9.85425	7.22222
2001-02-21	52	6.6	9.79761	8.88889
2001-02-22	53	7.2	9.7693	6.66667
2001-02-23	54	6.4	9.62771	5.55556
2001-02-24	55	6.8	9.68435	6.11111
2001-02-25	56	6	9.57108	5.55556
2001-02-26	57	5.4	9.48613	4.44444
2001-02-27	58	5.4	9.57108	6.66667
2001-02-28	59	5.6	9.91088	5.55556
2001-03-01	60	5.7	12.0346	5
2001-03-02	61	6.3	11.1002	5
2001-03-03	62	5.7	10.194	3.88889
2001-03-04	63	5.7	9.99583	6.66667
2001-03-05	64	7.4	10.3923	10.5556
2001-03-06	65	7.3	9.85425	10.5556
2001-03-07	66	7.5	9.85425	11.1111
2001-03-08	67	8.1	9.91088	8.33333
2001-03-09	68	7.4	10.194	7.22222
2001-03-10	69	6.7	9.82593	7.22222
2001-03-11	70	7.4	9.5994	7.22222
2001-03-12	71	7.7	9.62771	8.33333
2001-03-13	72	8.1	9.79761	7.22222
2001-03-14	73	7.3	9.7693	6.11111
2001-03-15	74	7	10.2507	5.55556
2001-03-16	75	6.8	11.8364	5
2001-03-17	76	7.4	10.2224	7.77778
2001-03-18	77	7.9	12.5727	9.44444
2001-03-19	78	7.1	26.0798	6.66667
2001-03-20	79	7.4	14.8663	7.22222
2001-03-21	80	7.8	11.3834	7.77778
2001-03-22	81	7.5	11.9497	7.77778
2001-03-23	82	7.5	13.3372	9.44444
2001-03-24	83	8.3	10.902	11.1111
2001-03-25	84	9.1	11.1568	8.88889
2001-03-26	85	8.1	11.3834	6.66667
2001-03-27	86	6.9	11.2418	6.11111
2001-03-28	87	7.9	11.3834	7.77778
2001-03-29	88	7.7	10.8737	6.66667
2001-03-30	89	8.3	10.7038	8.61111
2001-03-31	90	8.6	11.1285	8.33333
2001-04-01	91	8.2	11.4117	6.66667
2001-04-02	92	7.3	12.601	4.44444
2001-04-03	93	7.3	12.2329	5
2001-04-04	94	8	11.4683	27.7778
2001-04-05	95	8.3	11.2418	7.22222
2001-04-06	96	8.2	13.5637	6.11111
2001-04-07	97	8.2	13.8752	6.66667
2001-04-08	98	8	13.7903	7.22222
2001-04-09	99	7.7	13.5637	7.22222
2001-04-10	100	7.7	15.2061	5
2001-04-11	101	7.8	16.537	8.33333
2001-04-12	102	7.5	15.1495	6.11111
2001-04-13	103	7.8	14.4982	6.66667
2001-04-14	104	8.4	14.1301	6.66667
2001-04-15	105	9	12.9691	10.5556
2001-04-16	106	10.3	11.0152	12.7778
2001-04-17	107	10.5	11.5249	10
2001-04-18	108	10.4	11.2135	10
2001-04-19	109	9.7	10.8453	9.44444
2001-04-20	110	9.5	10.5055	10.5556
2001-04-21	111	10.1	10.3073	10.5556
2001-04-22	112	9.7	10.2507	8.33333
2001-04-23	113	9.6	10.2224	11.6667
2001-04-24	114	11.3	10.0525	15.5556
2001-04-25	115	12.6	9.96751	15.5556
2001-04-26	116	12.7	9.82593	13.8889
2001-04-27	117	11.5	9.82593	10.5556
2001-04-28	118	10.6	10.2507	8.33333
2001-04-29	119	9.3	10.6471	9.44444
2001-04-30	120	9.7	14.9796	8.88889
2001-05-01	121	9.2	17.1033	8.88889
2001-05-02	122	9.5	18.8873	9.44444
2001-05-03	123	9.6	20.2182	9.44444
2001-05-04	124	9.8	19.8501	10
2001-05-05	125	9.8	19.0006	9.44444
2001-05-06	126	10.1	16.2255	10.5556
2001-05-07	127	10.9	15.5459	13.3333
2001-05-08	128	10.8	13.1673	11.6667
2001-05-09	129	11.1	11.9497	10
2001-05-10	130	11.7	11.6948	11.1111
2001-05-11	131	12.1	11.4683	14.4444
2001-05-12	132	12.8	10.3356	14.4444
2001-05-13	133	12.2	9.96751	13.3333
2001-05-14	134	11.2	10.9586	10
2001-05-15	135	10.8	21.6057	11.6667
2001-05-16	136	10.8	28.1186	11.1111
2001-05-17	137	10.4	29.4495	9.44444
2001-05-18	138	11.2	23.7861	11.6667
2001-05-19	139	10.8	19.6519	11.6667
2001-05-20	140	11.6	18.774	12.7778
2001-05-21	141	12.1	18.0661	16.1111
2001-05-22	142	13.5	15.1495	20.5556
2001-05-23	143	14.3	13.6487	20.5556
2001-05-24	144	13.6	12.4594	16.1111
2001-05-25	145	13.7	10.9303	18.8889
2001-05-26	146	14.2	10.1657	17.2222
2001-05-27	147	13.6	10.6188	15
2001-05-28	148	12.1	11.0152	10.5556
2001-05-29	149	11.8	11.355	11.6667
2001-05-30	150	12.2	10.1657	14.4444
2001-05-31	151	13.9	9.54276	19.4444
2001-06-01	152	13.1	9.28791	12.2222
2001-06-02	153	11.4	9.85425	11.1111
2001-06-03	154	11.5	11.6948	11.1111
2001-06-04	155	11.3	10.6754	11.6667
2001-06-05	156	11.7	9.74098	12.7778
2001-06-06	157	12.5	9.74098	14.4444
2001-06-07	158	13.7	9.45781	17.2222
2001-06-08	159	14.4	9.03306	17.7778
2001-06-09	160	13.8	9.82593	12.7778
2001-06-10	161	12.1	9.88256	12.2222
2001-06-11	162	11.4	15.3194	9.44444
2001-06-12	163	10.4	20.2182	10.5556
2001-06-13	164	11.2	20.6713	13.8889
2001-06-14	165	11.5	16.7069	13.3333
2001-06-15	166	11.9	13.3089	13.8889
2001-06-16	167	11.8	12.8275	14.4444
2001-06-17	168	12.4	12.3461	13.8889
2001-06-18	169	13.2	11.8931	15
2001-06-19	170	14	10.6471	18.3333
2001-06-20	171	14.9	9.99583	19.4444
2001-06-21	172	15.3	9.62771	18.8889
2001-06-22	173	14.3	9.17464	14.4444
2001-06-23	174	13.5	9.06138	13.8889
2001-06-24	175	12.6	9.37286	12.2222
2001-06-25	176	13.2	9.31623	15
2001-06-26	177	14	9.14633	17.7778
2001-06-27	178	13.5	9.85425	16.1111
2001-06-28	179	13.2	14.1301	15.5556
2001-06-29	180	13.3	14.1301	15.5556
2001-06-30	181	14.2	10.3356	15.5556
2001-07-01	182	14.8	8.83484	16.6667
2001-07-02	183	15	8.26851	18.3333
2001-07-03	184	15.5	8.15524	21.1111
2001-07-04	185	16.1	8.07029	18.8889
2001-07-05	186	15.2	7.98534	16.1111
2001-07-06	187	14.8	7.98534	16.1111
2001-07-07	188	15.2	7.78712	16.1111
2001-07-08	189	15.8	7.47564	18.8889
2001-07-09	190	16.4	7.16415	21.1111
2001-07-10	191	16.6	6.88098	18.8889
2001-07-11	192	16.6	6.7394	18.3333
2001-07-12	193	15.8	6.48455	17.7778
2001-07-13	194	15.2	6.0598	15
2001-07-14	195	14.4	5.77663	15.5556
2001-07-15	196	13.1	5.77663	18.3333
2001-07-16	197	13	9.06138	15
2001-07-17	198	13.2	8.29682	15.5556
2001-07-18	199	13.6	6.51286	15.5556
2001-07-19	200	14.8	7.27742	18.3333
2001-07-20	201	14.7	7.78712	17.7778
2001-07-21	202	13.9	7.64554	15
2001-07-22	203	14	7.64554	17.7778
2001-07-23	204	15.2	7.56059	18.3333
2001-07-24	205	15.8	7.419	17.7778
2001-07-25	206	15.5	7.16415	18.8889
2001-07-26	207	15	6.82435	17.2222
2001-07-27	208	14.2	6.45623	16.1111
2001-07-28	209	13.6	7.33405	15.5556
2001-07-29	210	13.6	6.93762	16.1111
2001-07-30	211	14.6	5.88989	16.1111
2001-07-31	212	14.4	5.43683	15
2001-08-01	213	14	5.01207	15.5556
2001-08-02	214	15.6	4.81386	18.8889
2001-08-03	215	15	5.01207	17.2222
2001-08-04	216	15	4.72891	17.2222
2001-08-05	217	14.5	4.50237	18.3333
2001-08-06	218	15.9	4.2192	19.4444
2001-08-07	219	16.4	4.10594	19.4444
2001-08-08	220	16.5	3.96435	20
2001-08-09	221	17.1	3.76613	23.3333
2001-08-10	222	17.5	3.65287	23.3333
2001-08-11	223	17.4	3.7095	20.5556
2001-08-12	224	17.5	3.65287	21.6667
2001-08-13	225	17.6	3.56792	19.4444
2001-08-14	226	16.8	3.56792	18.8889
2001-08-15	227	16.1	3.56792	17.7778
2001-08-16	228	15.2	3.56792	15.5556
2001-08-17	229	15	3.56792	17.2222
2001-08-18	230	14.8	4.0493	17.2222
2001-08-19	231	15.2	4.10594	17.7778
2001-08-20	232	14.9	4.24752	16.1111
2001-08-21	233	13.5	7.16415	15.5556
2001-08-22	234	13.1	11.4683	16.1111
2001-08-23	235	12.9	12.8558	15
2001-08-24	236	13.6	9.79761	16.6667
2001-08-25	237	14.4	6.82435	18.3333
2001-08-26	238	15.3	5.04039	18.8889
2001-08-27	239	15.4	4.44574	17.2222
2001-08-28	240	16.1	4.2192	19.4444
2001-08-29	241	16.1	3.99267	19.4444
2001-08-30	242	16.1	3.82277	18.3333
2001-08-31	243	16.3	3.73782	18.3333
2001-09-01	244	14.9	3.93604	16.6667
2001-09-02	245	14.7	4.02099	16.6667
2001-09-03	246	14.6	3.79445	16.6667
2001-09-04	247	14.5	4.19089	15.5556
2001-09-05	248	13.8	4.07762	14.4444
2001-09-06	249	13	4.07762	12.7778
2001-09-07	250	14	4.30415	16.1111
2001-09-08	251	13.7	5.12534	16.6667
2001-09-09	252	13.6	6.34296	17.2222
2001-09-10	253	13.6	6.3996	17.2222
2001-09-11	254	13.8	5.80494	17.7778
2001-09-12	255	14.1	5.63504	18.3333
2001-09-13	256	14.3	5.57841	18.3333
2001-09-14	257	14.4	5.46514	18.3333
2001-09-15	258	14.5	5.43683	17.7778
2001-09-16	259	13.5	5.43683	12.7778
2001-09-17	260	12.8	5.46514	12.7778
2001-09-18	261	12.9	5.52178	13.8889
2001-09-19	262	13.4	5.40851	15
2001-09-20	263	12.8	5.38019	14.4444
2001-09-21	264	12.8	6.28633	15
2001-09-22	265	13.4	6.25801	18.3333
2001-09-23	266	13.7	7.39068	17.7778
2001-09-24	267	13.5	7.61722	15
2001-09-25	268	13.2	7.7588	14.4444
2001-09-26	269	12.8	9.03306	12.2222
2001-09-27	270	11.9	8.89148	10.5556
2001-09-28	271	11.9	8.21187	12.7778
2001-09-29	272	12	8.01365	16.1111
2001-09-30	273	12.3	7.64554	15
2001-10-01	274	12.1	7.27742	15.5556
2001-10-02	275	11.7	7.30573	14.4444
2001-10-03	276	11.4	7.33405	12.7778
2001-10-04	277	11.2	7.33405	16.1111
2001-10-05	278	11.3	8.80652	15.5556
2001-10-06	279	11.6	11.1285	12.7778
2001-10-07	280	11.2	10.1657	11.1111
2001-10-08	281	11.6	11.44	11.1111
2001-10-09	282	11.4	11.9497	11.1111
2001-10-10	283	10.4	11.6948	8.88889
2001-10-11	284	11.1	14.3849	11.1111
2001-10-12	285	10.7	13.9319	11.1111
2001-10-13	286	11.3	13.2239	10.5556
2001-10-14	287	11.4	14.2717	11.6667
2001-10-15	288	11.1	14.0168	12.2222
2001-10-16	289	10.6	13.3089	10
2001-10-17	290	10.5	13.1673	9.44444
2001-10-18	291	10	11.8931	9.44444
2001-10-19	292	10.7	12.2329	11.1111
2001-10-20	293	10.1	13.1956	8.33333
2001-10-21	294	9.7	13.2806	8.88889
2001-10-22	295	10.3	13.7903	10.5556
2001-10-23	296	10	13.7336	10
2001-10-24	297	9.4	13.6204	7.77778
2001-10-25	298	9.5	16.622	10
2001-10-26	299	9.9	14.7247	10.5556
2001-10-27	300	9.5	17.5847	5.55556
2001-10-28	301	8.4	17.8679	5
2001-10-29	302	8.6	16.2538	6.66667
2001-10-30	303	9.4	16.1406	10
2001-10-31	304	9.4	19.5952	10
2001-11-01	305	9.4	19.6802	10
2001-11-02	306	9.8	16.4804	9.44444
2001-11-03	307	9.2	20.8978	8.88889
2001-11-04	308	9.5	21.0111	8.88889
2001-11-05	309	9.1	18.321	6.11111
2001-11-06	310	8.2	15.7441	6.11111
2001-11-07	311	8	14.4982	7.77778
2001-11-08	312	7.9	13.2806	6.66667
2001-11-09	313	7.9	13.7053	7.77778
2001-11-10	314	8.1	14.1584	8.33333
2001-11-11	315	8.8	13.7903	10
2001-11-12	316	9.2	14.0451	10.5556
2001-11-13	317	9.4	14.7531	11.1111
2001-11-14	318	9.9	48.7049	13.3333
2001-11-15	319	9.9	43.3247	12.2222
2001-11-16	320	9.2	34.8297	8.88889
2001-11-17	321	8.5	27.2691	6.66667
2001-11-18	322	7.9	28.8831	8.33333
2001-11-19	323	8.5	31.4316	11.1111
2001-11-20	324	8.7	33.697	11.1111
2001-11-21	325	8.4	42.192	9.44444
2001-11-22	326	8.2	51.5366	7.77778
2001-11-23	327	8	56.6336	7.22222
2001-11-24	328	7.5	51.2534	6.66667
2001-11-25	329	7.4	47.2891	5
2001-11-26	330	7.3	45.8732	6.11111
2001-11-27	331	7.3	43.0415	5
2001-11-28	332	6.7	39.9267	3.88889
2001-11-29	333	6.7	40.493	6.11111
2001-11-30	334	6.8	36.8118	5.55556
2001-12-01	335	7.1	37.3782	8.33333
2001-12-02	336	6.9	36.2455	5
2001-12-03	337	6.7	33.1307	5
2001-12-04	338	6.7	29.1663	3.88889
2001-12-05	339	6.6	27.4956	3.33333
2001-12-06	340	6.8	28.1469	5.55556
2001-12-07	341	6.9	27.3823	6.66667
2001-12-08	342	7.1	26.2497	7.22222
2001-12-09	343	6.8	28.6	3.88889
2001-12-10	344	6.5	28.3168	3.88889
2001-12-11	345	6.6	25.9948	4.44444
2001-12-12	346	6.6	22.7667	5
2001-12-13	347	7.4	41.3425	8.33333
2001-12-14	348	6.7	50.4039	4.44444
2001-12-15	349	6.3	45.8732	5.55556
2001-12-16	350	7.3	46.7227	8.33333
2001-12-17	351	6.8	47.8554	4.44444
2001-12-18	352	6.2	45.0237	5
2001-12-19	353	6	49.2712	3.33333
2001-12-20	354	6.1	47.8554	3.88889
2001-12-21	355	6	47.0059	4.44444
2001-12-22	356	5.6	49.5544	5
2001-12-23	357	5.6	48.1386	5
2001-12-24	358	5.4	46.7227	6.66667
2001-12-25	359	5.2	46.1564	3.88889
2001-12-26	360	5	44.7405	3.88889
2001-12-27	361	5.6	40.2099	7.22222
2001-12-28	362	5.9	34.8297	7.77778
2001-12-29	363	5.5	33.697	5.55556
2001-12-30	364	5.5	33.1307	5
2001-12-31	365	6	33.4138	6.66667
2002-01-01	1	6	29.7326	7.77778
2002-01-02	2	6.5	29.4495	7.77778
2002-01-03	3	6.2	25.8816	6.66667
2002-01-04	4	6.9	21.2659	7.77778
2002-01-05	5	7.1	18.6891	7.77778
2002-01-06	6	7.3	18.9723	10
2002-01-07	7	7.9	32.8475	12.7778
2002-01-08	8	7.7	41.3425	9.44444
2002-01-09	9	7.1	40.2099	7.22222
2002-01-10	10	6.2	41.9089	6.66667
2002-01-11	11	6.6	37.3782	8.33333
2002-01-12	12	6.7	34.2633	7.22222
2002-01-13	13	6.1	33.4138	3.33333
2002-01-14	14	5.5	35.1128	3.33333
2002-01-15	15	5.1	42.192	3.33333
2002-01-16	16	4.9	46.7227	1.66667
2002-01-17	17	5.1	46.1564	3.33333
2002-01-18	18	5.2	39.0772	2.77778
2002-01-19	19	5.7	36.8118	4.44444
2002-01-20	20	5.7	37.9445	5.55556
2002-01-21	21	5.4	38.794	3.33333
2002-01-22	22	5.2	36.8118	3.33333
2002-01-23	23	5.3	35.9623	4.44444
2002-01-24	24	6.1	32.2812	6.11111
2002-01-25	25	6.2	38.794	3.33333
2002-01-26	26	5.3	37.9445	1.66667
2002-01-27	27	5.1	31.7148	0
2002-01-28	28	5	28.8831	-1.11111
2002-01-29	29	5.2	26.9859	-1.11111
2002-01-30	30	5	27.3823	2.77778
2002-01-31	31	5.3	31.4316	3.88889
2002-02-01	32	5.5	33.4138	5.55556
2002-02-02	33	5.3	32.5643	5.55556
2002-02-03	34	5.8	31.998	5.55556
2002-02-04	35	5.3	31.1485	5
2002-02-05	36	5.5	30.5821	4.44444
2002-02-06	37	6	27.5522	7.77778
2002-02-07	38	6.2	27.5239	5.55556
2002-02-08	39	5.7	30.8653	6.11111
2002-02-09	40	5.9	27.9487	7.22222
2002-02-10	41	6.2	26.7027	6.11111
2002-02-11	42	5.9	25.8249	3.88889
2002-02-12	43	5.3	22.8517	3.33333
2002-02-13	44	5.7	22.0305	2.77778
2002-02-14	45	5.8	21.1526	5
2002-02-15	46	5.9	19.5669	7.77778
2002-02-16	47	6.7	19.1422	6.66667
2002-02-17	48	6.8	18.8024	6.11111
2002-02-18	49	7.4	19.6519	7.77778
2002-02-19	50	7.3	20.0766	6.66667
2002-02-20	51	6.7	19.7368	6.11111
2002-02-21	52	7.2	27.8637	10
2002-02-22	53	7.4	40.493	9.44444
2002-02-23	54	6.9	39.0772	4.44444
2002-02-24	55	6.3	33.697	2.77778
2002-02-25	56	5.5	28.6	3.88889
2002-02-26	57	5.8	28.6	5
2002-02-27	58	5.7	26.6744	2.77778
2002-02-28	59	6.1	28.1469	4.44444
2002-03-01	60	5.7	25.8249	3.88889
2002-03-02	61	5.7	23.5029	5
2002-03-03	62	5.9	22.8517	6.11111
2002-03-04	63	6.4	22.3136	7.77778
2002-03-05	64	6.6	25.9665	5
2002-03-06	65	5.6	30.5821	1.66667
2002-03-07	66	5.4	27.0709	1.11111
2002-03-08	67	5.2	30.299	1.66667
2002-03-09	68	5.4	30.299	6.11111
2002-03-10	69	5.8	30.299	7.22222
2002-03-11	70	6.2	36.2455	8.33333
2002-03-12	71	6.3	32.2812	5.55556
2002-03-13	72	6.2	32.2812	5
2002-03-14	73	6.2	31.7148	6.11111
2002-03-15	74	6.1	29.7326	3.88889
2002-03-16	75	5.6	27.6089	1.11111
2002-03-17	76	5.8	24.2958	2.22222
2002-03-18	77	5.8	21.0111	2.77778
2002-03-19	78	6.3	19.8501	4.44444
2002-03-20	79	5.7	29.7326	1.11111
2002-03-21	80	5.9	36.2455	6.11111
2002-03-22	81	5.7	40.7762	6.66667
2002-03-23	82	6.1	40.493	9.44444
2002-03-24	83	6.1	40.7762	9.44444
2002-03-25	84	6.5	39.6435	9.44444
2002-03-26	85	6.2	36.2455	6.66667
2002-03-27	86	6.4	32.5643	4.44444
2002-03-28	87	7	29.4495	8.33333
2002-03-29	88	7	28.6	8.88889
2002-03-30	89	7.2	29.4495	8.88889
2002-03-31	90	7.4	29.7326	10
2002-04-01	91	7.5	31.998	7.77778
2002-04-02	92	6.9	33.697	7.77778
2002-04-03	93	7.3	33.1307	9.44444
2002-04-04	94	7.8	31.998	11.1111
2002-04-05	95	7.5	29.1663	9.44444
2002-04-06	96	8.1	27.0142	10.5556
2002-04-07	97	7.8	27.5806	7.77778
2002-04-08	98	7.9	27.1558	12.7778
2002-04-09	99	7.9	29.1663	11.1111
2002-04-10	100	8.1	32.5643	10.5556
2002-04-11	101	8.4	34.2633	11.6667
2002-04-12	102	8.4	36.8118	12.2222
2002-04-13	103	8.6	44.1742	11.6667
2002-04-14	104	8.1	67.9603	7.77778
2002-04-15	105	7.6	56.9168	6.66667
2002-04-16	106	7.4	56.3504	6.11111
2002-04-17	107	7.7	50.9702	7.77778
2002-04-18	108	8.1	46.4396	9.44444
2002-04-19	109	7.7	51.2534	8.88889
2002-04-20	110	7.9	49.2712	9.44444
2002-04-21	111	7.9	48.1386	7.77778
2002-04-22	112	7.9	47.0059	7.77778
2002-04-23	113	8.1	38.2277	7.22222
2002-04-24	114	8.5	29.4495	8.88889
2002-04-25	115	9.4	25.6833	10
2002-04-26	116	8.9	25.5418	7.22222
2002-04-27	117	8.9	24.0693	8.33333
2002-04-28	118	10	20.6713	10.5556
2002-04-29	119	10.7	19.2554	11.6667
2002-04-30	120	11.3	19.5386	13.3333
2002-05-01	121	10.4	19.6235	8.88889
2002-05-02	122	10	19.397	8.88889
2002-05-03	123	9.8	21.8039	8.88889
2002-05-04	124	9.2	22.8233	8.88889
2002-05-05	125	9.7	23.0499	7.77778
2002-05-06	126	8.9	21.8323	6.11111
2002-05-07	127	8.9	26.3913	6.66667
2002-05-08	128	9.5	27.7221	8.33333
2002-05-09	129	9.4	27.6938	9.44444
2002-05-10	130	9.7	25.0887	10.5556
2002-05-11	131	10.5	21.7756	12.2222
2002-05-12	132	11.5	19.4253	17.2222
2002-05-13	133	10.9	18.1794	11.6667
2002-05-14	134	10.6	17.3016	10.5556
2002-05-15	135	10.8	16.0839	11.1111
2002-05-16	136	11	15.8857	12.7778
2002-05-17	137	11.9	16.3954	11.6667
2002-05-18	138	11.1	16.3954	13.8889
2002-05-19	139	10.9	16.4521	12.2222
2002-05-20	140	11.3	16.8202	13.3333
2002-05-21	141	11	16.7635	12.2222
2002-05-22	142	10.7	16.9334	12.7778
2002-05-23	143	11.2	16.5087	12.7778
2002-05-24	144	11.4	21.2659	13.8889
2002-05-25	145	11.5	32.2812	15
2002-05-26	146	11.4	33.697	16.1111
2002-05-27	147	11.5	33.697	15.5556
2002-05-28	148	11.5	30.5821	15.5556
2002-05-29	149	11.6	26.9576	13.8889
2002-05-30	150	12.1	19.7368	13.3333
2002-05-31	151	12.4	17.0467	14.4444
2002-06-01	152	12.4	17.8113	15.5556
2002-06-02	153	12.2	18.4626	14.4444
2002-06-03	154	12	18.2643	15
2002-06-04	155	11.9	18.7174	15
2002-06-05	156	12.2	25.74	15.5556
2002-06-06	157	11.6	29.1663	13.3333
2002-06-07	158	10.8	36.8118	10
2002-06-08	159	10.5	41.6257	10.5556
2002-06-09	160	11.7	41.6257	15.5556
2002-06-10	161	11.7	39.9267	15
2002-06-11	162	12.5	31.998	16.6667
2002-06-12	163	13.3	24.7772	20.5556
2002-06-13	164	14.1	18.4909	24.4444
2002-06-14	165	13.8	16.7069	16.1111
2002-06-15	166	13	17.1883	15
2002-06-16	167	12.4	16.9618	14.4444
2002-06-17	168	12.2	24.5507	14.4444
2002-06-18	169	12.5	33.697	14.4444
2002-06-19	170	12.9	34.2633	15
2002-06-20	171	13.4	34.2633	17.2222
2002-06-21	172	13.9	33.9802	20.5556
2002-06-22	173	13.9	33.4138	17.2222
2002-06-23	174	13.7	33.697	17.2222
2002-06-24	175	14.1	31.1485	19.4444
2002-06-25	176	14.4	25.9665	21.1111
2002-06-26	177	14.8	21.6907	22.2222
2002-06-27	178	14	21.4925	16.6667
2002-06-28	179	13.4	23.8711	14.4444
2002-06-29	180	13.8	25.8816	15.5556
2002-06-30	181	13.3	23.5879	16.1111
2002-07-01	182	13.7	20.1332	15.5556
2002-07-02	183	13.6	16.3388	15.5556
2002-07-03	184	13.5	11.8931	15.5556
2002-07-04	185	13.2	7.64554	15
2002-07-05	186	14.1	7.22078	16.1111
2002-07-06	187	14.9	7.27742	18.8889
2002-07-07	188	13.9	7.64554	16.6667
2002-07-08	189	13.7	8.01365	17.2222
2002-07-09	190	14.6	7.64554	18.8889
2002-07-10	191	16.1	7.61722	23.8889
2002-07-11	192	16.5	7.5889	20.5556
2002-07-12	193	16.3	7.2491	21.1111
2002-07-13	194	16.5	6.76772	20
2002-07-14	195	14.7	6.62613	16.1111
2002-07-15	196	14.9	6.59781	18.3333
2002-07-16	197	16	6.51286	19.4444
2002-07-17	198	16.4	6.68276	19.4444
2002-07-18	199	16.2	6.76772	19.4444
2002-07-19	200	15.7	6.79603	18.8889
2002-07-20	201	15.6	6.7394	20
2002-07-21	202	16.3	6.65445	20.5556
2002-07-22	203	17.2	6.65445	25
2002-07-23	204	17.5	6.5695	22.7778
2002-07-24	205	17.3	6.7394	21.1111
2002-07-25	206	15.7	6.65445	17.2222
2002-07-26	207	14.3	6.9093	15.5556
2002-07-27	208	14.7	6.96593	17.7778
2002-07-28	209	13.7	6.85267	15.5556
2002-07-29	210	13.8	7.05088	17.2222
2002-07-30	211	14.5	6.9093	17.2222
2002-07-31	212	14.7	6.65445	16.1111
2002-08-01	213	14.7	6.3996	18.3333
2002-08-02	214	14.7	6.37128	15.5556
2002-08-03	215	13.6	6.34296	15
2002-08-04	216	14	6.54118	15.5556
2002-08-05	217	13.8	6.08811	15.5556
2002-08-06	218	13.7	5.57841	16.1111
2002-08-07	219	14.3	4.87049	17.2222
2002-08-08	220	15	4.41742	18.8889
2002-08-09	221	15.8	5.21029	20.5556
2002-08-10	222	15.6	5.23861	18.8889
2002-08-11	223	15.4	4.98376	19.4444
2002-08-12	224	16	4.98376	20.5556
2002-08-13	225	16.6	4.95544	26.1111
2002-08-14	226	16.6	4.84217	22.7778
2002-08-15	227	16.3	4.78554	20
2002-08-16	228	16.3	4.81386	20
2002-08-17	229	15.5	4.81386	18.8889
2002-08-18	230	15.1	4.81386	17.2222
2002-08-19	231	14.1	4.95544	16.1111
2002-08-20	232	14.1	5.15366	16.1111
2002-08-21	233	14	5.04039	16.6667
2002-08-22	234	14.3	4.98376	17.7778
2002-08-23	235	15.2	4.89881	20
2002-08-24	236	15.6	4.81386	18.8889
2002-08-25	237	14.7	4.98376	16.6667
2002-08-26	238	14.5	5.09702	19.4444
2002-08-27	239	14.9	5.12534	20.5556
2002-08-28	240	15.7	5.35188	22.7778
2002-08-29	241	15.8	4.61564	18.3333
2002-08-30	242	15	4.67227	17.2222
2002-08-31	243	14.6	4.81386	18.3333
2002-09-01	244	14.3	4.81386	17.2222
2002-09-02	245	14.2	4.87049	17.7778
2002-09-03	246	13.7	5.63504	14.4444
2002-09-04	247	13.1	5.01207	14.4444
2002-09-05	248	12.9	4.78554	14.4444
2002-09-06	249	13	4.75722	13.8889
2002-09-07	250	13.3	4.75722	15.5556
2002-09-08	251	12.2	4.78554	12.7778
2002-09-09	252	13.6	4.78554	18.3333
2002-09-10	253	14.1	4.61564	18.3333
2002-09-11	254	14.3	4.72891	18.8889
2002-09-12	255	14.4	4.89881	19.4444
2002-09-13	256	14.6	4.92712	20
2002-09-14	257	14.7	5.01207	18.8889
2002-09-15	258	14.1	5.01207	16.1111
2002-09-16	259	13.8	5.23861	15.5556
2002-09-17	260	13.5	6.31465	15
2002-09-18	261	12.5	6.31465	15
2002-09-19	262	12.9	6.62613	15
2002-09-20	263	12.6	6.7394	13.8889
2002-09-21	264	11.7	6.88098	15
2002-09-22	265	12.1	7.0792	17.7778
2002-09-23	266	12.3	7.27742	17.2222
2002-09-24	267	12.6	7.33405	16.6667
2002-09-25	268	12.7	7.64554	17.7778
2002-09-26	269	12.6	7.56059	15.5556
2002-09-27	270	12.4	7.47564	15
2002-09-28	271	12.3	7.22078	16.1111
2002-09-29	272	12.4	7.44732	12.7778
2002-09-30	273	11.6	7.33405	10.5556
2002-10-01	274	10.7	7.19247	10.5556
2002-10-02	275	10.5	7.2491	11.1111
2002-10-03	276	11.8	8.12692	12.7778
2002-10-04	277	12.4	9.14633	13.8889
2002-10-05	278	12.4	9.14633	12.7778
2002-10-06	279	12.9	8.74989	14.4444
2002-10-07	280	12.8	9.14633	13.8889
2002-10-08	281	12.2	10.6471	13.3333
2002-10-09	282	12.5	11.1285	12.7778
2002-10-10	283	12	11.5249	10
2002-10-11	284	11.2	11.7515	9.44444
2002-10-12	285	10.3	11.6948	10.5556
2002-10-13	286	10.3	11.7515	10
2002-10-14	287	10.1	11.8364	11.6667
2002-10-15	288	10.3	11.8931	13.3333
2002-10-16	289	10.6	12.0913	15.5556
2002-10-17	290	10.6	11.4966	12.7778
2002-10-18	291	10.5	11.44	10
2002-10-19	292	11.1	11.6099	12.7778
2002-10-20	293	11.8	11.5816	12.7778
2002-10-21	294	11.9	11.3834	13.3333
2002-10-22	295	11.8	11.1002	12.7778
2002-10-23	296	10.7	9.54276	9.44444
2002-10-24	297	9.6	9.48613	6.66667
2002-10-25	298	9.2	9.40118	7.77778
2002-10-26	299	9.1	9.37286	6.11111
2002-10-27	300	8.8	9.37286	7.22222
2002-10-28	301	9.9	9.37286	9.44444
2002-10-29	302	9.4	9.37286	8.33333
2002-10-30	303	7.4	9.25959	5.55556
2002-10-31	304	6.7	9.20296	8.33333
2002-11-01	305	6.5	9.37286	7.22222
2002-11-02	306	6.3	9.48613	7.22222
2002-11-03	307	6.2	9.42949	5
2002-11-04	308	6.5	9.40118	5
2002-11-05	309	8.1	9.62771	11.1111
2002-11-06	310	9	9.88256	10
2002-11-07	311	9.3	9.74098	11.6667
2002-11-08	312	9.5	9.65603	10
2002-11-09	313	9.4	10.0525	10
2002-11-10	314	9.3	10.0808	8.88889
2002-11-11	315	9.5	9.62771	11.1111
2002-11-12	316	9.8	10.3639	11.6667
2002-11-13	317	9.5	9.85425	10.5556
2002-11-14	318	9.5	9.7693	9.44444
2002-11-15	319	8.6	10.0808	7.77778
2002-11-16	320	8.6	10.5338	8.33333
2002-11-17	321	9.1	10.4489	9.44444
2002-11-18	322	9	10.279	9.44444
2002-11-19	323	9.7	11.2418	12.2222
2002-11-20	324	9.8	10.6754	12.2222
2002-11-21	325	9.6	10.3923	11.6667
2002-11-22	326	9.8	10.2224	10.5556
2002-11-23	327	9.6	9.99583	8.33333
2002-11-24	328	8.1	9.71266	6.11111
2002-11-25	329	6.4	9.5994	3.33333
2002-11-26	330	6.1	9.71266	5
2002-11-27	331	6.1	9.82593	5.55556
2002-11-28	332	6.4	9.85425	6.11111
2002-11-29	333	6.8	9.82593	5
2002-11-30	334	6.7	9.85425	3.88889
2002-12-01	335	6.7	9.79761	5.55556
2002-12-02	336	7.8	9.74098	6.66667
2002-12-03	337	6.8	9.74098	3.88889
2002-12-04	338	7.2	9.74098	7.22222
2002-12-05	339	7.1	9.68435	6.66667
2002-12-06	340	6.5	9.71266	6.66667
2002-12-07	341	6.2	9.68435	3.88889
2002-12-08	342	6.3	9.74098	3.88889
2002-12-09	343	6.6	9.91088	5
2002-12-10	344	7.3	10.5905	7.22222
2002-12-11	345	7.4	11.4966	8.33333
2002-12-12	346	7.7	13.5637	10.5556
2002-12-13	347	7.9	13.054	8.88889
2002-12-14	348	8.3	12.4028	11.6667
2002-12-15	349	8.3	12.3744	9.44444
2002-12-16	350	7.9	14.838	6.66667
2002-12-17	351	7.1	13.5071	5
2002-12-18	352	7	12.4311	5
2002-12-19	353	6.7	11.4683	6.66667
2002-12-20	354	6.7	11.1568	7.77778
2002-12-21	355	6.6	10.7604	5.55556
2002-12-22	356	6.9	10.5622	4.44444
2002-12-23	357	5.3	10.3639	2.77778
2002-12-24	358	5.5	10.4489	3.88889
2002-12-25	359	6.3	10.4489	8.33333
2002-12-26	360	6.4	10.5622	5.55556
2002-12-27	361	6.5	10.7038	7.22222
2002-12-28	362	6.4	10.3923	3.88889
2002-12-29	363	6.3	10.5055	3.88889
2002-12-30	364	6.2	14.0451	5
2002-12-31	365	6.4	12.0346	6.11111
2003-01-01	1	6	18.3493	6.66667
2003-01-02	2	6.7	23.7861	10.5556
2003-01-03	3	7.2	20.473	10
2003-01-04	4	7.9	14.9796	10
2003-01-05	5	7.6	13.7336	7.77778
2003-01-06	6	6.5	12.4028	7.22222
2003-01-07	7	6.4	11.4966	6.66667
2003-01-08	8	5.9	12.2329	6.11111
2003-01-09	9	5.6	10.9586	8.88889
2003-01-10	10	5.6	10.817	7.22222
2003-01-11	11	5.8	10.4489	6.66667
2003-01-12	12	6.8	11.6948	7.22222
2003-01-13	13	6.9	11.3267	7.77778
2003-01-14	14	6.9	11.8081	6.11111
2003-01-15	15	5.7	11.1285	3.33333
2003-01-16	16	5.8	10.8453	5.55556
2003-01-17	17	5.8	10.7321	6.66667
2003-01-18	18	5.4	10.5338	5.55556
2003-01-19	19	6.1	10.4206	6.11111
2003-01-20	20	6.1	10.279	5.55556
2003-01-21	21	6.4	11.5249	6.11111
2003-01-22	22	6.6	16.9051	8.33333
2003-01-23	23	7.1	17.9529	10.5556
2003-01-24	24	7.4	14.4133	9.44444
2003-01-25	25	7.7	13.5354	10
2003-01-26	26	8.6	27.3257	10.5556
2003-01-27	27	7.8	33.4138	8.88889
2003-01-28	28	7.4	29.7326	7.77778
2003-01-29	29	6.9	26.5045	6.66667
2003-01-30	30	7.6	25.9948	10.5556
2003-01-31	31	8.1	38.794	10
2003-02-01	32	7.6	35.1128	7.77778
2003-02-02	33	7.1	38.2277	7.77778
2003-02-03	34	6.8	35.1128	6.11111
2003-02-04	35	5.9	39.9267	5
2003-02-05	36	5.4	33.9802	3.33333
2003-02-06	37	5.2	31.4316	3.88889
2003-02-07	38	5.2	26.7311	2.77778
2003-02-08	39	5.4	22.8233	2.22222
2003-02-09	40	5.6	19.1988	1.66667
2003-02-10	41	5.8	18.3493	3.33333
2003-02-11	42	5.5	15.0929	5
2003-02-12	43	5.5	14.4982	5
2003-02-13	44	6.1	14.2434	6.11111
2003-02-14	45	7.2	13.8752	7.77778
2003-02-15	46	7.4	12.7142	7.77778
2003-02-16	47	7.9	12.4594	7.77778
2003-02-17	48	7.8	11.8931	6.66667
2003-02-18	49	7.7	11.5533	6.11111
2003-02-19	50	7.7	11.3834	7.22222
2003-02-20	51	7.8	12.2895	7.77778
2003-02-21	52	7.9	16.1123	7.77778
2003-02-22	53	7.2	25.5134	7.22222
2003-02-23	54	6.5	22.0871	5
2003-02-24	55	5	24.2958	3.33333
2003-02-25	56	4.8	25.7683	2.77778
2003-02-26	57	5.2	26.2497	4.44444
2003-02-27	58	5.6	26.1364	5.55556
2003-02-28	59	5.7	24.5507	6.11111
2003-03-01	60	6.3	21.0394	6.66667
2003-03-02	61	5.8	17.4431	5
2003-03-03	62	6.5	18.6608	6.66667
2003-03-04	63	6.7	16.1972	6.66667
2003-03-05	64	7.1	15.7158	6.66667
2003-03-06	65	6.7	17.8113	6.11111
2003-03-07	66	5.9	18.7457	4.44444
2003-03-08	67	5.8	23.2198	3.88889
2003-03-09	68	6.4	28.6	8.33333
2003-03-10	69	6.6	35.9623	10
2003-03-11	70	7	32.5643	8.88889
2003-03-12	71	6.8	53.2356	10.5556
2003-03-13	72	7.4	50.9702	12.7778
2003-03-14	73	7.7	39.3604	11.6667
2003-03-15	74	8	37.095	10.5556
2003-03-16	75	7.3	38.794	8.33333
2003-03-17	76	7	37.6613	7.22222
2003-03-18	77	6.7	38.2277	7.77778
2003-03-19	78	6.8	36.2455	8.33333
2003-03-20	79	7.2	34.5465	8.88889
2003-03-21	80	7.3	33.697	8.33333
2003-03-22	81	8	38.2277	8.33333
2003-03-23	82	7.5	33.9802	6.66667
2003-03-24	83	7.4	30.5821	5
2003-03-25	84	7.6	37.9445	9.44444
2003-03-26	85	7.1	44.1742	7.77778
2003-03-27	86	7.2	43.3247	8.88889
2003-03-28	87	7.5	43.0415	8.33333
2003-03-29	88	8	42.4752	12.7778
2003-03-30	89	8.3	41.9089	13.8889
2003-03-31	90	8.4	44.4574	10.5556
2003-04-01	91	7.8	42.7584	6.66667
2003-04-02	92	7.5	35.9623	5.55556
2003-04-03	93	7.4	37.9445	5.55556
2003-04-04	94	7.2	43.6079	6.11111
2003-04-05	95	7.2	43.0415	5
2003-04-06	96	7.5	42.4752	7.77778
2003-04-07	97	7.7	41.0594	9.44444
2003-04-08	98	8.4	39.0772	12.2222
2003-04-09	99	8.7	35.396	9.44444
2003-04-10	100	8.6	31.4316	11.1111
2003-04-11	101	9.1	29.7326	11.6667
2003-04-12	102	8.8	29.1663	10
2003-04-13	103	8.9	31.998	10
2003-04-14	104	9.3	29.7326	9.44444
2003-04-15	105	9.3	28.1186	10.5556
2003-04-16	106	9.4	28.2602	10.5556
2003-04-17	107	9.5	28.8831	9.44444
2003-04-18	108	9.2	27.6655	8.88889
2003-04-19	109	9.2	24.5507	10.5556
2003-04-20	110	9.9	21.3226	11.6667
2003-04-21	111	9.6	21.0111	9.44444
2003-04-22	112	9.5	20.2182	10
2003-04-23	113	9.3	19.7651	7.77778
2003-04-24	114	9.3	21.7756	7.22222
2003-04-25	115	9.8	19.935	9.44444
2003-04-26	116	9.9	18.2077	9.44444
2003-04-27	117	10.7	15.7158	11.1111
2003-04-28	118	10.7	13.5921	13.3333
2003-04-29	119	10.8	13.2523	12.2222
2003-04-30	120	10.9	12.9691	12.7778
2003-05-01	121	11.8	12.7992	14.4444
2003-05-02	122	11.3	12.9408	11.6667
2003-05-03	123	10.8	12.6576	10
2003-05-04	124	10.4	12.7142	9.44444
2003-05-05	125	10.5	13.139	8.33333
2003-05-06	126	10.2	14.6115	10
2003-05-07	127	10	13.1956	8.88889
2003-05-08	128	10.2	13.3089	10.5556
2003-05-09	129	11.1	12.9125	11.6667
2003-05-10	130	11.2	11.6665	12.7778
2003-05-11	131	11.3	11.5249	12.7778
2003-05-12	132	11.8	11.6665	13.3333
2003-05-13	133	12.1	11.4683	14.4444
2003-05-14	134	11.3	11.2984	11.1111
2003-05-15	135	10.3	11.3834	8.88889
2003-05-16	136	9.9	12.9691	8.88889
2003-05-17	137	10.1	12.2329	8.88889
2003-05-18	138	10.1	11.4966	9.44444
2003-05-19	139	10.8	11.1851	12.7778
2003-05-20	140	11	11.0436	12.2222
2003-05-21	141	11.9	10.9303	15
2003-05-22	142	12.1	10.6471	15
2003-05-23	143	13.4	10.5338	18.8889
2003-05-24	144	13.6	10.4772	16.1111
2003-05-25	145	12.4	10.3356	13.8889
2003-05-26	146	12.5	10.2224	14.4444
2003-05-27	147	13.7	10.194	17.7778
2003-05-28	148	14.1	9.88256	17.2222
2003-05-29	149	14.1	9.65603	17.2222
2003-05-30	150	13.3	9.57108	16.1111
2003-05-31	151	13.2	9.40118	15.5556
2003-06-01	152	13.1	9.31623	15.5556
2003-06-02	153	13.6	9.25959	15.5556
2003-06-03	154	13.8	9.17464	16.6667
2003-06-04	155	14.5	9.14633	20
2003-06-05	156	15.3	8.94811	22.7778
2003-06-06	157	16	8.83484	23.8889
2003-06-07	158	16.2	8.80652	23.3333
2003-06-08	159	14.9	8.86316	17.2222
2003-06-09	160	13.2	9.00474	15
2003-06-10	161	12.4	8.60831	13.3333
2003-06-11	162	13.1	8.24019	15
2003-06-12	163	13	8.83484	13.8889
2003-06-13	164	13.1	9.06138	15
2003-06-14	165	13.2	8.89148	15
2003-06-15	166	14.3	9.37286	16.1111
2003-06-16	167	14.3	10.7604	18.3333
2003-06-17	168	15	10.1374	22.2222
2003-06-18	169	13.6	10.0808	14.4444
2003-06-19	170	12.2	10.2507	13.8889
2003-06-20	171	11.7	10.5905	12.7778
2003-06-21	172	11.6	11.7515	12.7778
2003-06-22	173	11.7	12.3461	13.3333
2003-06-23	174	12.2	11.5533	14.4444
2003-06-24	175	13	10.5622	16.1111
2003-06-25	176	14.2	8.49504	18.3333
2003-06-26	177	15.6	8.21187	20.5556
2003-06-27	178	16.5	8.12692	20.5556
2003-06-28	179	16.4	8.94811	22.7778
2003-06-29	180	16	8.60831	20
2003-06-30	181	15.4	8.15524	17.2222
2003-07-01	182	14.7	8.26851	16.6667
2003-07-02	183	15	8.01365	16.1111
2003-07-03	184	15.4	7.33405	17.2222
2003-07-04	185	16	7.419	18.3333
2003-07-05	186	15.6	6.99425	17.7778
2003-07-06	187	15.9	7.05088	18.8889
2003-07-07	188	15.9	7.0792	16.1111
2003-07-08	189	15.4	6.9093	17.2222
2003-07-09	190	16	6.37128	19.4444
2003-07-10	191	16.5	7.78712	22.7778
2003-07-11	192	16.4	7.9287	20
2003-07-12	193	16.7	6.59781	20
2003-07-13	194	15.8	6.08811	18.3333
2003-07-14	195	16.1	5.94653	20
2003-07-15	196	16.9	5.35188	20
2003-07-16	197	16.9	4.84217	18.3333
2003-07-17	198	16.7	4.84217	19.4444
2003-07-18	199	17.2	5.01207	21.1111
2003-07-19	200	17.4	5.23861	22.2222
2003-07-20	201	17.8	4.84217	23.3333
2003-07-21	202	18.3	4.84217	23.8889
2003-07-22	203	18.3	4.75722	22.7778
2003-07-23	204	18.1	4.53069	20
2003-07-24	205	17.3	4.33247	18.8889
2003-07-25	206	17.1	4.36079	18.3333
2003-07-26	207	17.5	4.33247	18.8889
2003-07-27	208	17.7	4.33247	21.1111
2003-07-28	209	18	4.33247	23.3333
2003-07-29	210	18.4	4.2192	25.5556
2003-07-30	211	18.9	3.93604	25.5556
2003-07-31	212	18.7	3.93604	19.4444
2003-08-01	213	17.6	3.93604	17.7778
2003-08-02	214	17.3	3.90772	19.4444
2003-08-03	215	16.6	3.93604	16.6667
2003-08-04	216	16.8	3.8794	18.8889
2003-08-05	217	16.3	3.90772	18.8889
2003-08-06	218	16.6	3.65287	18.8889
2003-08-07	219	17.3	3.56792	19.4444
2003-08-08	220	17.2	3.56792	19.4444
2003-08-09	221	16.9	3.59623	18.8889
2003-08-10	222	16	3.73782	18.8889
2003-08-11	223	16.2	3.73782	18.8889
2003-08-12	224	16.5	3.73782	18.3333
2003-08-13	225	16.2	4.24752	19.4444
2003-08-14	226	16.3	4.41742	20.5556
2003-08-15	227	16.6	4.33247	19.4444
2003-08-16	228	16.2	3.85108	19.4444
2003-08-17	229	17.1	3.1998	22.7778
2003-08-18	230	17.5	3.1998	21.1111
2003-08-19	231	17.3	3.5396	19.4444
2003-08-20	232	16.4	3.93604	18.8889
2003-08-21	233	16.4	3.90772	21.6667
2003-08-22	234	16	3.7095	17.7778
2003-08-23	235	15.3	3.22812	16.1111
2003-08-24	236	14.8	3.08653	17.2222
2003-08-25	237	15.9	3.08653	21.6667
2003-08-26	238	16.1	3.14316	18.3333
2003-08-27	239	15.8	3.28475	18.3333
2003-08-28	240	15.7	3.17148	19.4444
2003-08-29	241	16.2	3.22812	20.5556
2003-08-30	242	16.5	3.17148	21.1111
2003-08-31	243	16.2	3.11485	19.4444
2003-09-01	244	15.7	3.08653	17.7778
2003-09-02	245	15.8	3.05821	22.2222
2003-09-03	246	16.3	3.17148	22.7778
2003-09-04	247	16.8	3.11485	23.3333
2003-09-05	248	16.6	3.11485	21.6667
2003-09-06	249	16.2	3.08653	18.8889
2003-09-07	250	15.9	3.28475	16.6667
2003-09-08	251	15.2	3.76613	16.1111
2003-09-09	252	14.7	3.76613	16.1111
2003-09-10	253	14.2	3.65287	15.5556
2003-09-11	254	14	3.65287	15.5556
2003-09-12	255	13.9	3.90772	15
2003-09-13	256	13.5	3.39802	15
2003-09-14	257	13.5	3.3697	14.4444
2003-09-15	258	13	3.34138	13.3333
2003-09-16	259	12.6	4.61564	12.2222
2003-09-17	260	12.8	5.06871	12.7778
2003-09-18	261	13.3	4.61564	15.5556
2003-09-19	262	13.8	5.29524	15.5556
2003-09-20	263	13	6.0598	13.8889
2003-09-21	264	12.5	5.29524	15
2003-09-22	265	13	5.04039	17.7778
2003-09-23	266	13.5	6.48455	17.7778
2003-09-24	267	13.2	6.9093	17.2222
2003-09-25	268	13.4	7.0792	17.7778
2003-09-26	269	13.5	7.02257	18.8889
2003-09-27	270	13.6	7.0792	21.1111
2003-09-28	271	13.7	7.10752	21.1111
2003-09-29	272	13.2	6.99425	15
2003-09-30	273	13.6	6.99425	17.2222
2003-10-01	274	13.3	6.96593	16.6667
2003-10-02	275	12.8	6.96593	13.8889
2003-10-03	276	13.2	7.02257	12.2222
2003-10-04	277	12.6	7.05088	10.5556
2003-10-05	278	12.8	7.0792	13.8889
2003-10-06	279	13.5	7.2491	16.6667
2003-10-07	280	13.7	8.41009	14.4444
2003-10-08	281	12.8	9.25959	13.3333
2003-10-09	282	12.2	9.42949	11.6667
2003-10-10	283	12	9.5994	11.6667
2003-10-11	284	11.8	10.7321	11.1111
2003-10-12	285	12.1	11.6099	12.2222
2003-10-13	286	12.4	11.4966	12.7778
2003-10-14	287	12.1	10.9303	11.1111
2003-10-15	288	11	11.4683	8.88889
2003-10-16	289	11.7	14.838	13.8889
2003-10-17	290	12.6	16.5653	17.2222
2003-10-18	291	11.9	11.7798	15
2003-10-19	292	12.2	11.44	16.1111
2003-10-20	293	13.3	21.8889	16.1111
2003-10-21	294	13.4	49.8376	16.1111
2003-10-22	295	12.9	30.8653	15
2003-10-23	296	12	26.3346	11.1111
2003-10-24	297	10.9	24.6639	10.5556
2003-10-25	298	10.5	18.5475	11.1111
2003-10-26	299	10.6	16.5653	12.7778
2003-10-27	300	11	15.6875	11.6667
2003-10-28	301	11.6	13.0824	11.1111
2003-10-29	302	10.5	13.0824	8.33333
2003-10-30	303	9.2	12.516	6.66667
2003-10-31	304	7.5	12.516	3.33333
2003-11-01	305	7.4	12.3461	2.22222
2003-11-02	306	8.1	12.2045	3.88889
2003-11-03	307	6.9	12.0913	2.77778
2003-11-04	308	6.3	12.0346	3.33333
2003-11-05	309	6.1	12.0063	3.88889
2003-11-06	310	6.1	11.9214	4.44444
2003-11-07	311	6.6	11.8364	5.55556
2003-11-08	312	8	11.9214	9.44444
2003-11-09	313	8.1	12.1762	10
2003-11-10	314	8.5	13.4505	9.44444
2003-11-11	315	9.1	13.5354	9.44444
2003-11-12	316	8.1	11.7232	7.77778
2003-11-13	317	7.1	11.5816	6.11111
2003-11-14	318	7.8	11.5533	8.88889
2003-11-15	319	8.5	12.2045	8.33333
2003-11-16	320	8.4	13.4222	8.33333
2003-11-17	321	8.4	13.8469	8.88889
2003-11-18	322	9	29.1663	10.5556
2003-11-19	323	8.2	35.6792	7.77778
2003-11-20	324	7.1	32.8475	2.22222
2003-11-21	325	6.5	39.3604	1.66667
2003-11-22	326	6.1	35.9623	1.11111
2003-11-23	327	6.8	39.6435	4.44444
2003-11-24	328	6.9	40.2099	5.55556
2003-11-25	329	6.9	38.5108	6.66667
2003-11-26	330	7	35.9623	6.66667
2003-11-27	331	6.9	29.4495	6.11111
2003-11-28	332	7.2	31.998	8.33333
2003-11-29	333	7.4	46.4396	7.22222
2003-11-30	334	6.7	39.9267	4.44444
2003-12-01	335	6.9	37.6613	5.55556
2003-12-02	336	7.3	37.9445	8.33333
2003-12-03	337	6.8	43.6079	5.55556
2003-12-04	338	6.3	36.8118	-17.7778
2003-12-05	339	7	34.5465	8.88889
2003-12-06	340	7.3	31.7148	7.77778
2003-12-07	341	6.9	29.1663	5.55556
2003-12-08	342	7	32.5643	4.44444
2003-12-09	343	6.2	37.3782	4.44444
2003-12-10	344	6.3	37.095	5.55556
2003-12-11	345	6.4	37.095	6.11111
2003-12-12	346	6.4	34.5465	6.11111
2003-12-13	347	6.6	33.4138	6.66667
2003-12-14	348	6.4	33.4138	4.44444
2003-12-15	349	6.5	30.8653	5.55556
2003-12-16	350	6.6	29.4495	7.77778
2003-12-17	351	6.4	26.5895	7.22222
2003-12-18	352	6.5	22.3986	7.77778
2003-12-19	353	7.2	21.1526	7.22222
2003-12-20	354	7.7	22.0871	7.77778
2003-12-21	355	7.6	22.0022	7.22222
2003-12-22	356	6.9	21.096	6.66667
2003-12-23	357	7.2	20.5297	8.33333
2003-12-24	358	7.5	20.3315	7.77778
2003-12-25	359	7.2	20.2748	4.44444
2003-12-26	360	6.7	19.7368	2.77778
2003-12-27	361	6.2	19.7934	2.77778
2003-12-28	362	6.1	19.8501	1.66667
2003-12-29	363	5.1	19.7934	0.555556
2003-12-30	364	4.6	19.4536	-1.11111
2003-12-31	365	5.2	19.5103	1.11111
2004-01-01	1	5.3	16.7919	1.11111
2004-01-02	2	5.5	16.2538	1.11111
2004-01-03	3	5.3	16.1689	-1.11111
2004-01-04	4	3.8	15.914	-4.44444
2004-01-05	5	3.1	16.9051	-5
2004-01-06	6	3.1	17.9529	-2.77778
2004-01-07	7	3.7	17.7263	1.66667
2004-01-08	8	4.7	19.8784	5.55556
2004-01-09	9	5.6	20.8412	8.88889
2004-01-10	10	6.1	21.0394	6.66667
2004-01-11	11	6	20.7562	5
2004-01-12	12	6.5	18.2927	5.55556
2004-01-13	13	7	18.2643	7.77778
2004-01-14	14	7.4	18.8307	9.44444
2004-01-15	15	7.4	23.4463	8.88889
2004-01-16	16	7	26.816	7.22222
2004-01-17	17	7	19.4253	5.55556
2004-01-18	18	7.5	18.0378	7.22222
2004-01-19	19	7.6	17.8962	8.33333
2004-01-20	20	7	17.1883	5
2004-01-21	21	6.4	16.622	3.88889
2004-01-22	22	6.3	16.7919	4.44444
2004-01-23	23	7.2	19.0572	6.66667
2004-01-24	24	6.9	25.0887	3.88889
2004-01-25	25	6.4	21.2942	3.33333
2004-01-26	26	6.5	22.5119	6.11111
2004-01-27	27	6.1	31.7148	7.22222
2004-01-28	28	6	34.8297	5
2004-01-29	29	7.2	51.5366	10.5556
2004-01-30	30	7.2	57.7663	7.22222
2004-01-31	31	6.5	45.8732	4.44444
2004-02-01	32	6.3	45.0237	5
2004-02-02	33	5.9	44.4574	5.55556
2004-02-03	34	5.9	46.1564	6.66667
2004-02-04	35	6.1	42.192	5.55556
2004-02-05	36	5.5	38.5108	3.88889
2004-02-06	37	6	37.6613	6.66667
2004-02-07	38	6	37.095	6.11111
2004-02-08	39	5.9	36.5287	4.44444
2004-02-09	40	5.5	35.9623	3.33333
2004-02-10	41	5.4	33.9802	4.44444
2004-02-11	42	6	27.892	8.88889
2004-02-12	43	6.6	22.8517	8.88889
2004-02-13	44	6.8	20.6713	7.77778
2004-02-14	45	7.5	20.9544	7.22222
2004-02-15	46	7.3	20.5014	8.33333
2004-02-16	47	6.9	20.0483	7.77778
2004-02-17	48	7	19.1988	7.77778
2004-02-18	49	7.8	18.6041	8.88889
2004-02-19	50	7.9	18.3493	6.66667
2004-02-20	51	7.2	18.321	6.11111
2004-02-21	52	6.9	17.7263	7.22222
2004-02-22	53	7.6	17.2449	11.1111
2004-02-23	54	7.9	16.8202	8.33333
2004-02-24	55	7.9	16.7635	8.33333
2004-02-25	56	7.2	16.622	7.22222
2004-02-26	57	7.7	16.8202	8.33333
2004-02-27	58	8.1	17.5564	8.33333
2004-02-28	59	8.1	17.2166	7.77778
2004-02-29	60	8	16.9334	7.77778
2004-03-01	61	7.8	19.4536	7.22222
2004-03-02	62	6.9	26.7594	5.55556
2004-03-03	63	6.5	26.9576	5.55556
2004-03-04	64	7	26.6744	7.22222
2004-03-05	65	6.9	29.4495	7.77778
2004-03-06	66	6.7	30.299	6.66667
2004-03-07	67	7.1	31.1485	10
2004-03-08	68	7.8	28.8831	12.7778
2004-03-09	69	7.9	24.2392	8.88889
2004-03-10	70	8.1	20.2182	8.33333
2004-03-11	71	8.1	17.4715	8.33333
2004-03-12	72	8.1	16.622	6.66667
2004-03-13	73	8	16.4521	8.33333
2004-03-14	74	8.5	16.3954	10
2004-03-15	75	8.4	16.1123	7.77778
2004-03-16	76	8.7	15.9707	8.33333
2004-03-17	77	8.7	16.0273	8.88889
2004-03-18	78	8.2	16.537	6.11111
2004-03-19	79	7.7	16.3671	6.11111
2004-03-20	80	7.9	15.6309	9.44444
2004-03-21	81	9	15.7158	12.2222
2004-03-22	82	9.8	15.8574	13.8889
2004-03-23	83	9.7	15.6026	9.44444
2004-03-24	84	8.9	16.3388	8.33333
2004-03-25	85	8.4	16.9334	8.33333
2004-03-26	86	8.6	17.4998	8.33333
2004-03-27	87	9.2	16.9901	9.44444
2004-03-28	88	9.3	16.3105	10.5556
2004-03-29	89	10.4	16.0556	17.7778
2004-03-30	90	9.9	16.4237	8.33333
2004-03-31	91	9	16.1123	7.22222
2004-04-01	92	8.8	15.6592	7.77778
2004-04-02	93	9	15.5459	10
2004-04-03	94	10.1	15.461	13.3333
2004-04-04	95	10.1	15.2911	10
2004-04-05	96	9.5	15.2628	10.5556
2004-04-06	97	9.8	15.0362	10
2004-04-07	98	10	15.0362	11.1111
2004-04-08	99	10	15.0079	11.6667
2004-04-09	100	10.4	14.8097	12.7778
2004-04-10	101	10.8	14.8097	15.5556
2004-04-11	102	11.5	14.7247	17.2222
2004-04-12	103	11.4	14.6398	12.7778
2004-04-13	104	11.1	14.5832	12.2222
2004-04-14	105	10.4	14.7531	9.44444
2004-04-15	106	10	14.1301	9.44444
2004-04-16	107	10.2	12.6293	10
2004-04-17	108	10.7	12.063	11.1111
2004-04-18	109	10.9	11.4683	10.5556
2004-04-19	110	10.6	10.5055	10
2004-04-20	111	11	10.1657	10
2004-04-21	112	10.9	9.9392	11.1111
2004-04-22	113	11.2	9.45781	12.2222
2004-04-23	114	10.9	8.94811	11.6667
2004-04-24	115	11	9.00474	10.5556
2004-04-25	116	11.5	8.89148	13.8889
2004-04-26	117	12.8	8.80652	17.2222
2004-04-27	118	11.8	8.72157	11.6667
2004-04-28	119	11.5	8.74989	12.2222
2004-04-29	120	12.2	8.43841	15
2004-04-30	121	13	8.43841	17.7778
2004-05-01	122	13.4	8.55167	18.3333
2004-05-02	123	13.3	8.63662	16.1111
2004-05-03	124	13.2	8.43841	15.5556
2004-05-04	125	12.6	8.38177	13.3333
2004-05-05	126	11.8	8.32514	11.6667
2004-05-06	127	12	8.24019	13.3333
2004-05-07	128	12.3	8.26851	13.3333
2004-05-08	129	12.1	8.46672	12.7778
2004-05-09	130	12	8.35346	12.7778
2004-05-10	131	11.1	8.38177	10
2004-05-11	132	11.3	8.77821	11.6667
2004-05-12	133	12	8.41009	13.3333
2004-05-13	134	12.6	8.32514	13.8889
2004-05-14	135	13.2	8.24019	14.4444
2004-05-15	136	12.1	8.29682	12.2222
2004-05-16	137	11.9	8.35346	13.8889
2004-05-17	138	12.9	8.26851	16.1111
2004-05-18	139	13.9	8.21187	16.6667
2004-05-19	140	13.2	8.21187	13.8889
2004-05-20	141	12.7	8.18356	15.5556
2004-05-21	142	12.2	7.95702	13.8889
2004-05-22	143	12	7.95702	12.7778
2004-05-23	144	12.5	7.98534	15
2004-05-24	145	13.5	7.78712	16.6667
2004-05-25	146	13.4	7.81544	16.6667
2004-05-26	147	12.7	13.0257	15
2004-05-27	148	11.9	19.482	12.7778
2004-05-28	149	11.6	17.9529	12.2222
2004-05-29	150	11	26.4479	12.2222
2004-05-30	151	11.4	20.9827	14.4444
2004-05-31	152	11.3	16.2822	12.7778
2004-06-01	153	12.2	11.7515	14.4444
2004-06-02	154	13.6	9.42949	15.5556
2004-06-03	155	14.5	8.77821	18.8889
2004-06-04	156	15.1	8.49504	18.8889
2004-06-05	157	14	8.52336	15
2004-06-06	158	12.9	9.25959	14.4444
2004-06-07	159	12.4	8.86316	13.3333
2004-06-08	160	14	8.77821	16.6667
2004-06-09	161	14.2	8.83484	16.1111
2004-06-10	162	12.3	10.3073	13.8889
2004-06-11	163	11.7	11.7515	12.7778
2004-06-12	164	12.3	11.6948	12.2222
2004-06-13	165	12.9	11.7798	14.4444
2004-06-14	166	12.5	11.6948	13.8889
2004-06-15	167	13.4	10.194	15
2004-06-16	168	14.4	9.11801	18.3333
2004-06-17	169	15.5	8.07029	22.2222
2004-06-18	170	16.3	7.98534	24.4444
2004-06-19	171	15.6	7.7588	22.2222
2004-06-20	172	15.6	7.73049	22.7778
2004-06-21	173	16.2	7.70217	23.3333
2004-06-22	174	16.1	7.7588	18.3333
2004-06-23	175	14.8	7.7588	16.6667
2004-06-24	176	13.4	7.90039	16.6667
2004-06-25	177	14.1	7.73049	18.3333
2004-06-26	178	15.5	7.53227	18.8889
2004-06-27	179	15.9	7.27742	18.8889
2004-06-28	180	15.9	7.16415	20.5556
2004-06-29	181	16.1	7.10752	19.4444
2004-06-30	182	15.9	7.16415	18.8889
2004-07-01	183	15.1	6.99425	17.2222
2004-07-02	184	14.7	6.42791	16.1111
2004-07-03	185	14.8	6.54118	17.7778
2004-07-04	186	14.8	6.76772	17.7778
2004-07-05	187	15.9	6.54118	20
2004-07-06	188	14.8	6.48455	17.2222
2004-07-07	189	14.3	6.54118	16.1111
2004-07-08	190	15	6.45623	17.2222
2004-07-09	191	14.5	5.43683	16.6667
2004-07-10	192	14.6	5.15366	17.2222
2004-07-11	193	15.3	5.71999	17.2222
2004-07-12	194	16.6	5.06871	20.5556
2004-07-13	195	17.2	4.95544	21.6667
2004-07-14	196	17.6	4.559	20.5556
2004-07-15	197	17.2	4.27584	18.8889
2004-07-16	198	17.4	4.19089	21.1111
2004-07-17	199	17.7	4.16257	22.7778
2004-07-18	200	17.5	4.16257	22.7778
2004-07-19	201	17.4	4.16257	21.1111
2004-07-20	202	16.9	4.16257	21.1111
2004-07-21	203	17.2	4.10594	21.1111
2004-07-22	204	18.4	3.90772	24.4444
2004-07-23	205	19.3	3.76613	27.7778
2004-07-24	206	19.6	3.7095	26.6667
2004-07-25	207	17.8	3.76613	16.1111
2004-07-26	208	17.5	3.76613	20
2004-07-27	209	17.8	3.62455	22.2222
2004-07-28	210	18.4	3.5396	22.2222
2004-07-29	211	18.8	3.42633	22.7778
2004-07-30	212	17.6	3.45465	18.3333
2004-07-31	213	17.5	3.39802	20.5556
2004-08-01	214	18.2	3.34138	20.5556
2004-08-02	215	17.3	3.34138	17.2222
2004-08-03	216	16.8	3.22812	19.4444
2004-08-04	217	16.6	3.34138	16.6667
2004-08-05	218	16.8	3.14316	18.8889
2004-08-06	219	15.6	3.7095	16.6667
2004-08-07	220	15.7	4.13425	18.8889
2004-08-08	221	16.9	3.65287	20.5556
2004-08-09	222	18.2	3.34138	25.5556
2004-08-10	223	18.6	3.25643	22.2222
2004-08-11	224	18.6	3.25643	22.2222
2004-08-12	225	18.7	3.42633	22.2222
2004-08-13	226	18.2	3.39802	21.1111
2004-08-14	227	17.8	3.45465	21.1111
2004-08-15	228	17.7	3.68118	21.1111
2004-08-16	229	17.5	3.73782	19.4444
2004-08-17	230	17.8	3.73782	21.1111
2004-08-18	231	17.9	3.73782	20.5556
2004-08-19	232	18	3.90772	21.6667
2004-08-20	233	17.7	4.07762	20.5556
2004-08-21	234	16.8	3.85108	18.8889
2004-08-22	235	15.6	4.75722	16.1111
2004-08-23	236	15.4	4.95544	18.3333
2004-08-24	237	15.6	12.7709	16.6667
2004-08-25	238	14.8	22.2004	16.6667
2004-08-26	239	14.8	21.2093	17.7778
2004-08-27	240	14.8	21.6624	18.8889
2004-08-28	241	15.2	14.215	18.3333
2004-08-29	242	16	8.89148	19.4444
2004-08-30	243	16.4	6.31465	20.5556
2004-08-31	244	16.6	5.63504	18.8889
2004-09-01	245	16.2	5.38019	16.6667
2004-09-02	246	15.2	5.43683	15.5556
2004-09-03	247	15.2	5.40851	16.6667
2004-09-04	248	15	4.67227	16.1111
2004-09-05	249	15	4.50237	17.2222
2004-09-06	250	14.4	4.27584	15.5556
2004-09-07	251	14.7	4.13425	17.2222
2004-09-08	252	14.9	3.8794	16.6667
2004-09-09	253	15.3	3.8794	17.7778
2004-09-10	254	15	3.82277	16.6667
2004-09-11	255	15.2	9.9392	17.2222
2004-09-12	256	13.9	14.1301	15.5556
2004-09-13	257	13.9	14.1867	15
2004-09-14	258	14	13.5354	15
2004-09-15	259	13.5	14.4982	14.4444
2004-09-16	260	13.5	18.2927	14.4444
2004-09-17	261	13.4	17.3299	13.3333
2004-09-18	262	13	22.6251	11.6667
2004-09-19	263	13.3	23.5029	12.7778
2004-09-20	264	13.3	24.041	12.7778
2004-09-21	265	13.2	23.6728	13.3333
2004-09-22	266	13	23.6728	12.7778
2004-09-23	267	13.4	21.1526	15
2004-09-24	268	13.2	18.4342	14.4444
2004-09-25	269	13.1	16.0273	15.5556
2004-09-26	270	13	14.5265	13.8889
2004-09-27	271	13.1	14.5548	15.5556
2004-09-28	272	13	14.3566	15.5556
2004-09-29	273	12.9	13.1956	13.8889
2004-09-30	274	12.9	12.4877	13.3333
2004-10-01	275	12.6	12.2895	16.1111
2004-10-02	276	12.4	12.5727	15.5556
2004-10-03	277	12.4	12.4311	15
2004-10-04	278	12.3	12.4594	11.6667
2004-10-05	279	12.4	12.7709	13.8889
2004-10-06	280	13.3	12.8275	15
2004-10-07	281	12.7	12.5727	14.4444
2004-10-08	282	12.5	14.6681	13.3333
2004-10-09	283	12.2	15.999	12.7778
2004-10-10	284	12.1	14.1301	12.7778
2004-10-11	285	12	13.3372	13.8889
2004-10-12	286	12.4	12.9974	15.5556
2004-10-13	287	12.3	12.9408	16.1111
2004-10-14	288	12.3	12.8841	15.5556
2004-10-15	289	12.4	12.9974	14.4444
2004-10-16	290	12.5	15.1495	12.2222
2004-10-17	291	11.9	21.7473	11.1111
2004-10-18	292	11.2	18.9723	10
2004-10-19	293	11	16.1689	12.2222
2004-10-20	294	10.8	15.0645	10.5556
2004-10-21	295	10.9	14.0734	10
2004-10-22	296	10.6	13.7053	10
2004-10-23	297	10.4	12.7426	8.33333
2004-10-24	298	10.1	12.7142	8.88889
2004-10-25	299	9.7	12.5443	9.44444
2004-10-26	300	10.1	12.3461	10.5556
2004-10-27	301	9.5	12.1762	9.44444
2004-10-28	302	8.8	12.2329	6.11111
2004-10-29	303	10	12.2612	9.44444
2004-10-30	304	10.2	12.2895	10
2004-10-31	305	9.4	11.9497	6.66667
2004-11-01	306	9	12.1196	10
2004-11-02	307	9.8	18.0661	10
2004-11-03	308	8.9	18.0661	6.11111
2004-11-04	309	8	18.7457	5
2004-11-05	310	7.9	22.5119	3.88889
2004-11-06	311	8.5	22.5402	7.77778
2004-11-07	312	9.3	22.1721	11.1111
2004-11-08	313	8.9	16.9051	7.77778
2004-11-09	314	9.5	13.4222	9.44444
2004-11-10	315	9.3	12.601	8.33333
2004-11-11	316	9.1	12.4594	6.66667
2004-11-12	317	8.5	12.1762	7.22222
2004-11-13	318	9.3	12.0913	10
2004-11-14	319	9.4	12.0063	10
2004-11-15	320	9.6	12.3744	10
2004-11-16	321	9.6	12.7142	8.88889
2004-11-17	322	8.7	12.4877	6.11111
2004-11-18	323	8.6	14.1867	7.77778
2004-11-19	324	8.6	13.5071	6.11111
2004-11-20	325	7.3	12.8841	3.88889
2004-11-21	326	7.7	12.5443	6.11111
2004-11-22	327	8.6	12.4594	7.22222
2004-11-23	328	9.2	12.5443	8.88889
2004-11-24	329	9.6	20.8978	11.6667
2004-11-25	330	9.4	28.8831	7.77778
2004-11-26	331	8.2	27.7505	5
2004-11-27	332	8.1	25.4002	6.11111
2004-11-28	333	7.5	24.6922	3.88889
2004-11-29	334	6.7	24.1259	1.11111
2004-11-30	335	7.6	24.3808	5
2004-12-01	336	7.8	22.2287	5
2004-12-02	337	7.6	23.418	5
2004-12-03	338	7.9	23.1348	6.66667
2004-12-04	339	8	20.9544	6.11111
2004-12-05	340	7.8	21.181	4.44444
2004-12-06	341	7.4	21.6907	5.55556
2004-12-07	342	7.4	25.1453	5.55556
2004-12-08	343	7.7	27.4956	7.77778
2004-12-09	344	7.8	26.6744	7.22222
2004-12-10	345	8.8	35.1128	12.7778
2004-12-11	346	8.5	51.8197	7.22222
2004-12-12	347	7.1	43.3247	7.22222
2004-12-13	348	7.5	46.4396	9.44444
2004-12-14	349	7.7	47.5722	10
2004-12-15	350	7.7	46.1564	8.33333
2004-12-16	351	7.1	50.1207	5
2004-12-17	352	7.4	44.4574	6.11111
2004-12-18	353	7.5	43.3247	8.88889
2004-12-19	354	7.6	42.192	6.66667
2004-12-20	355	7.2	41.6257	3.88889
2004-12-21	356	6.9	36.5287	4.44444
2004-12-22	357	7.1	31.1485	5
2004-12-23	358	6.6	23.7295	2.22222
2004-12-24	359	6.9	20.6996	2.77778
2004-12-25	360	7.7	18.7457	5.55556
2004-12-26	361	7.9	18.4059	5.55556
2004-12-27	362	7	17.4431	5.55556
2004-12-28	363	6.5	15.3477	1.11111
2004-12-29	364	7.3	15.1495	4.44444
2004-12-30	365	7.4	15.2628	4.44444
2004-12-31	366	6.8	14.1867	4.44444
2005-01-01	1	7.3	13.7053	5
2005-01-02	2	6.5	13.5921	2.22222
2005-01-03	3	5.3	13.5071	1.11111
2005-01-04	4	5	13.3372	1.11111
2005-01-05	5	4.7	13.3938	0
2005-01-06	6	5.2	12.601	0.555556
2005-01-07	7	6.3	12.6859	3.88889
2005-01-08	8	6.2	12.3744	3.88889
2005-01-09	9	6.1	12.2329	1.66667
2005-01-10	10	5.8	12.1479	0.555556
2005-01-11	11	5.1	12.2045	-0.555556
2005-01-12	12	6.3	12.2045	5.55556
2005-01-13	13	6.2	12.1196	2.22222
2005-01-14	14	5.2	12.1479	0.555556
2005-01-15	15	4.3	12.2329	0
2005-01-16	16	5.4	12.5443	3.33333
2005-01-17	17	6.3	20.1616	8.88889
2005-01-18	18	7	56.0673	13.8889
2005-01-19	19	8.2	44.7405	13.3333
2005-01-20	20	7.4	46.1564	11.1111
2005-01-21	21	6.8	54.3683	12.7778
2005-01-22	22	6.6	55.5009	11.6667
2005-01-23	23	6.8	50.6871	10.5556
2005-01-24	24	6.5	48.7049	10
2005-01-25	25	6.4	42.4752	6.66667
2005-01-26	26	7	33.697	7.22222
2005-01-27	27	7.6	28.2035	8.33333
2005-01-28	28	7.5	23.7861	8.88889
2005-01-29	29	7.8	22.6251	7.22222
2005-01-30	30	7.8	22.3703	7.77778
2005-01-31	31	8	22.3136	8.88889
2005-02-01	32	7.6	19.7085	7.22222
2005-02-02	33	8.3	16.3671	11.1111
2005-02-03	34	8.1	13.9319	7.22222
2005-02-04	35	8.7	14.0734	7.77778
2005-02-05	36	8	13.5071	4.44444
2005-02-06	37	7.2	13.4222	4.44444
2005-02-07	38	7.1	13.1956	5
2005-02-08	39	6.5	12.8841	4.44444
2005-02-09	40	6.5	12.8275	5
2005-02-10	41	6.4	12.8841	4.44444
2005-02-11	42	6.7	13.6487	5.55556
2005-02-12	43	7.3	13.4505	6.66667
2005-02-13	44	7.2	13.3655	5
2005-02-14	45	6.9	13.2239	2.77778
2005-02-15	46	5.8	13.1107	1.66667
2005-02-16	47	5.8	13.1107	5
2005-02-17	48	5.9	13.139	5.55556
2005-02-18	49	6	13.2523	6.11111
2005-02-19	50	5.9	12.9691	3.33333
2005-02-20	51	5.9	12.9408	5.55556
2005-02-21	52	5.9	12.9408	5
2005-02-22	53	5.9	12.8841	6.11111
2005-02-23	54	6.2	12.8275	7.22222
2005-02-24	55	6.8	12.7992	8.88889
2005-02-25	56	7.2	12.8275	7.22222
2005-02-26	57	7.1	11.9497	5
2005-02-27	58	7.4	10.7887	8.88889
2005-02-28	59	8.8	10.1374	11.1111
2005-03-01	60	9.6	10.3639	11.6667
2005-03-02	61	9.3	10.1091	10
2005-03-03	62	9.2	9.99583	10.5556
2005-03-04	63	9	9.85425	10.5556
2005-03-05	64	9.4	9.85425	10.5556
2005-03-06	65	10.1	9.85425	12.7778
2005-03-07	66	10.3	9.82593	13.8889
2005-03-08	67	10.4	9.74098	13.3333
2005-03-09	68	10.7	9.68435	11.6667
2005-03-10	69	10.6	9.65603	12.7778
2005-03-11	70	10.5	9.65603	12.2222
2005-03-12	71	10.6	9.65603	12.2222
2005-03-13	72	9.4	9.42949	10.5556
2005-03-14	73	9.1	9.65603	9.44444
2005-03-15	74	8.9	9.71266	9.44444
2005-03-16	75	8.8	9.88256	7.22222
2005-03-17	76	9.2	9.7693	8.33333
2005-03-18	77	9.2	9.71266	6.66667
2005-03-19	78	8.5	9.79761	7.77778
2005-03-20	79	9.1	9.82593	8.88889
2005-03-21	80	8.6	9.91088	6.11111
2005-03-22	81	8.5	9.85425	7.22222
2005-03-23	82	8.9	9.42949	8.33333
2005-03-24	83	9.4	9.40118	8.88889
2005-03-25	84	9.2	9.34454	7.22222
2005-03-26	85	9	11.7515	8.33333
2005-03-27	86	8.9	17.4998	8.88889
2005-03-28	87	8.7	14.215	6.66667
2005-03-29	88	8.3	14.1584	7.77778
2005-03-30	89	8.8	12.8558	8.88889
2005-03-31	90	9.1	13.4222	8.88889
2005-04-01	91	9.8	14.1301	8.33333
2005-04-02	92	9.1	13.8186	8.33333
2005-04-03	93	9.3	13.6487	8.33333
2005-04-04	94	9.1	13.2806	7.77778
2005-04-05	95	9.2	11.355	10
2005-04-06	96	10.3	10.8737	12.2222
2005-04-07	97	10.3	10.8737	8.33333
2005-04-08	98	9.8	11.1285	7.77778
2005-04-09	99	10.2	10.4772	8.88889
2005-04-10	100	9.5	10.3639	7.22222
2005-04-11	101	9.7	11.3267	6.66667
2005-04-12	102	8.5	11.2135	6.11111
2005-04-13	103	9.1	10.902	7.22222
2005-04-14	104	9.7	10.7321	7.22222
2005-04-15	105	9.1	10.7887	7.77778
2005-04-16	106	9.8	16.7352	9.44444
2005-04-17	107	9.4	19.4536	8.33333
2005-04-18	108	9.9	15.0362	10
2005-04-19	109	10.4	13.2806	10.5556
2005-04-20	110	11.2	12.1479	11.6667
2005-04-21	111	11.5	11.3267	12.2222
2005-04-22	112	12.3	10.902	18.3333
2005-04-23	113	12.2	10.6754	14.4444
2005-04-24	114	12.7	10.9586	14.4444
2005-04-25	115	12.7	10.5338	14.4444
2005-04-26	116	11.8	10.2507	15.5556
2005-04-27	117	12.5	10.2224	16.1111
2005-04-28	118	12.6	10.1374	15
2005-04-29	119	11.2	10.5055	11.1111
2005-04-30	120	11.5	11.0152	13.3333
2005-05-01	121	12.2	10.3923	15
2005-05-02	122	12.4	10.4489	13.8889
2005-05-03	123	12.6	10.3923	13.8889
2005-05-04	124	12.6	10.0241	15
2005-05-05	125	12.8	9.9392	16.1111
2005-05-06	126	12.6	9.82593	14.4444
2005-05-07	127	12.1	9.71266	12.7778
2005-05-08	128	11.6	9.65603	12.7778
2005-05-09	129	11.6	9.99583	12.7778
2005-05-10	130	12.2	11.6665	13.8889
2005-05-11	131	11.9	10.7321	12.7778
2005-05-12	132	11.9	10.4772	14.4444
2005-05-13	133	12.4	10.1091	15.5556
2005-05-14	134	13.5	10.1091	16.6667
2005-05-15	135	12.8	12.3461	14.4444
2005-05-16	136	12.2	15.7725	13.3333
2005-05-17	137	11.6	15.0362	11.6667
2005-05-18	138	12.4	15.1212	14.4444
2005-05-19	139	12.2	15.0645	12.7778
2005-05-20	140	11.9	15.0645	12.2222
2005-05-21	141	11.5	15.2344	11.6667
2005-05-22	142	11.6	12.6293	11.6667
2005-05-23	143	11.9	11.2418	12.2222
2005-05-24	144	12.7	10.5905	14.4444
2005-05-25	145	13.7	10.1657	17.7778
2005-05-26	146	14.8	9.88256	22.7778
2005-05-27	147	15.6	9.68435	23.3333
2005-05-28	148	15.9	9.57108	18.3333
2005-05-29	149	14.2	9.68435	15.5556
2005-05-30	150	13	9.65603	15
2005-05-31	151	12.7	9.54276	14.4444
2005-06-01	152	12.7	9.65603	15
2005-06-02	153	12.5	9.62771	15
2005-06-03	154	12.3	9.45781	13.3333
2005-06-04	155	12.9	9.31623	13.8889
2005-06-05	156	12.9	9.28791	13.3333
2005-06-06	157	12.6	9.28791	12.7778
2005-06-07	158	12.1	9.23128	13.3333
2005-06-08	159	12.4	9.23128	13.3333
2005-06-09	160	13.6	9.11801	16.1111
2005-06-10	161	13.5	8.86316	14.4444
2005-06-11	162	13.5	8.80652	13.8889
2005-06-12	163	13.3	9.17464	14.4444
2005-06-13	164	14.1	8.97643	14.4444
2005-06-14	165	13.8	8.72157	15
2005-06-15	166	14	8.63662	15
2005-06-16	167	14.3	8.38177	16.6667
2005-06-17	168	14.9	9.03306	16.6667
2005-06-18	169	14.9	8.49504	17.2222
2005-06-19	170	15.4	8.35346	18.3333
2005-06-20	171	16.3	8.21187	20
2005-06-21	172	15.1	8.12692	17.2222
2005-06-22	173	13.3	8.18356	14.4444
2005-06-23	174	13.9	8.26851	16.1111
2005-06-24	175	15.1	8.07029	17.7778
2005-06-25	176	15	8.04197	17.7778
2005-06-26	177	13.7	8.04197	15
2005-06-27	178	13.4	8.07029	15
2005-06-28	179	13.3	8.04197	16.1111
2005-06-29	180	14.3	7.98534	18.3333
2005-06-30	181	15.8	7.9287	19.4444
2005-07-01	182	14.9	7.73049	16.1111
2005-07-02	183	14	7.19247	15.5556
2005-07-03	184	14.8	7.0792	17.2222
2005-07-04	185	16.1	6.99425	18.8889
2005-07-05	186	16	6.96593	18.3333
2005-07-06	187	16.1	7.81544	17.2222
2005-07-07	188	15.3	6.99425	17.2222
2005-07-08	189	14.6	6.99425	14.4444
2005-07-09	190	14.9	7.0792	16.6667
2005-07-10	191	14.6	6.93762	15.5556
2005-07-11	192	14.8	7.90039	18.3333
2005-07-12	193	15.5	8.32514	18.3333
2005-07-13	194	15.1	8.21187	18.3333
2005-07-14	195	15.6	8.0986	18.8889
2005-07-15	196	15.4	7.87207	17.2222
2005-07-16	197	15	7.87207	17.7778
2005-07-17	198	16.1	7.84375	21.1111
2005-07-18	199	17.2	7.5889	22.7778
2005-07-19	200	16.9	6.7394	17.7778
2005-07-20	201	16.9	6.51286	18.3333
2005-07-21	202	17.1	6.51286	20.5556
2005-07-22	203	16.7	6.71108	18.3333
2005-07-23	204	16.1	6.51286	18.3333
2005-07-24	205	16.5	6.48455	18.3333
2005-07-25	206	16.7	6.3996	19.4444
2005-07-26	207	17	6.34296	21.6667
2005-07-27	208	17.4	6.03148	23.3333
2005-07-28	209	17.8	5.69168	21.1111
2005-07-29	210	17.7	5.52178	21.1111
2005-07-30	211	17.9	5.21029	21.6667
2005-07-31	212	18.2	5.04039	21.6667
2005-08-01	213	17.4	4.67227	18.6111
2005-08-02	214	16.5	4.559	18.6111
2005-08-03	215	17.1	4.19089	20.5556
2005-08-04	216	18	4.02099	22.7778
2005-08-05	217	18.5	3.73782	22.2222
2005-08-06	218	18	3.82277	18.6111
2005-08-07	219	17.9	3.8794	19.7222
2005-08-08	220	18.1	3.85108	20
2005-08-09	221	17.7	3.8794	17.7778
2005-08-10	222	16.5	3.85108	16.3889
2005-08-11	223	15.5	4.24752	17.5
2005-08-12	224	16.2	5.04039	18.6111
2005-08-13	225	17.4	4.33247	22.2222
2005-08-14	226	18	4.19089	23.0556
2005-08-15	227	18.1	4.13425	22.2222
2005-08-16	228	16.4	3.79445	16.1111
2005-08-17	229	15.5	3.90772	18.3333
2005-08-18	230	16.3	3.93604	19.4444
2005-08-19	231	16.7	3.93604	20.8333
2005-08-20	232	17.1	4.02099	19.4444
2005-08-21	233	17.2	4.0493	18.6111
2005-08-22	234	17	3.96435	18.6111
2005-08-23	235	16.2	3.76613	17.2222
2005-08-24	236	15.6	3.85108	18.6111
2005-08-25	237	16.3	3.82277	21.1111
2005-08-26	238	16.5	3.76613	20.5556
2005-08-27	239	16.4	3.82277	19.1667
2005-08-28	240	16.6	3.8794	19.4444
2005-08-29	241	16	4.13425	16.9444
2005-08-30	242	15.1	4.61564	16.1111
2005-08-31	243	15.8	4.19089	18.8889
2005-09-01	244	15.8	3.99267	19.7222
2005-09-02	245	15.6	4.02099	17.2222
2005-09-03	246	15.4	4.02099	16.6667
2005-09-04	247	15	4.02099	15.8333
2005-09-05	248	14.5	4.24752	16.1111
2005-09-06	249	14.5	4.16257	16.9444
2005-09-07	250	14.8	4.07762	18.0556
2005-09-08	251	15	4.0493	18.6111
2005-09-09	252	14.6	4.07762	15.8333
2005-09-10	253	13.3	5.66336	13.6111
2005-09-11	254	12.8	6.85267	15
2005-09-12	255	13.4	5.91821	15.8333
2005-09-13	256	13.4	5.60673	15.8333
2005-09-14	257	13.7	5.55009	15.2778
2005-09-15	258	14	5.57841	15
2005-09-16	259	13.1	5.63504	13.8889
2005-09-17	260	12.7	5.57841	14.4444
2005-09-18	261	12.9	5.55009	14.4444
2005-09-19	262	12.9	5.63504	15
2005-09-20	263	12.7	5.63504	15.5556
2005-09-21	264	11.9	6.2297	13.8889
2005-09-22	265	11.6	6.79603	12.5
2005-09-23	266	11.4	7.27742	13.3333
2005-09-24	267	11.3	7.64554	11.9444
2005-09-25	268	11.6	7.73049	14.4444
2005-09-26	269	11.9	7.73049	15
2005-09-27	270	12.4	7.81544	15.2778
2005-09-28	271	12.2	7.64554	14.1667
2005-09-29	272	12.9	7.84375	15.2778
2005-09-30	273	12.8	14.6681	13.6111
2005-10-01	274	12	10.5622	12.2222
2005-10-02	275	11.2	7.5889	9.44444
2005-10-03	276	10.9	7.19247	10.5556
2005-10-04	277	11	7.10752	11.9444
2005-10-05	278	11.7	7.19247	14.4444
2005-10-06	279	12	8.38177	13.3333
2005-10-07	280	12.1	10.5055	13.0556
2005-10-08	281	11.7	10.8737	11.9444
2005-10-09	282	11.9	10.9303	13.3333
2005-10-10	283	11.6	10.9586	11.3889
2005-10-11	284	12	11.3834	13.6111
2005-10-12	285	11.4	11.4117	11.1111
2005-10-13	286	11.9	11.2984	12.7778
2005-10-14	287	12	11.3834	15.8333
2005-10-15	288	12.3	11.6665	13.3333
2005-10-16	289	12.1	11.6099	12.7778
2005-10-17	290	12.5	11.4966	16.1111
2005-10-18	291	12.6	12.3744	12.2222
2005-10-19	292	12.4	13.1956	13.3333
2005-10-20	293	11.8	14.5832	10.8333
2005-10-21	294	11.7	15.2061	15
2005-10-22	295	11.8	14.5832	13.8889
2005-10-23	296	11.9	14.8946	11.9444
2005-10-24	297	12.1	14.7814	12.7778
2005-10-25	298	11.7	14.7247	12.7778
2005-10-26	299	11.4	14.7247	9.16667
2005-10-27	300	10	14.6964	8.05556
2005-10-28	301	10.8	15.1778	11.1111
2005-10-29	302	10.7	14.923	9.72222
2005-10-30	303	10.5	14.838	10
2005-10-31	304	10.6	17.8679	10.5556
2005-11-01	305	10.1	22.4835	8.61111
2005-11-02	306	9.6	24.9754	9.16667
2005-11-03	307	9.5	18.6891	7.77778
2005-11-04	308	8.9	17.4998	6.94444
2005-11-05	309	8.8	19.9067	6.11111
2005-11-06	310	8.9	24.3241	6.94444
2005-11-07	311	8.5	20.1049	6.94444
2005-11-08	312	8.4	14.4133	6.66667
2005-11-09	313	8.7	26.5895	7.77778
2005-11-10	314	9	45.0237	8.88889
2005-11-11	315	8.7	42.4752	5.83333
2005-11-12	316	8.4	39.3604	6.11111
2005-11-13	317	8.6	45.59	8.05556
2005-11-14	318	8.2	50.4039	5.27778
2005-11-15	319	7.6	46.7227	4.72222
2005-11-16	320	8.2	48.4217	7.22222
2005-11-17	321	8.2	45.8732	6.38889
2005-11-18	322	8.2	37.6613	7.22222
2005-11-19	323	8.2	28.2318	6.66667
2005-11-20	324	8.4	24.1825	5.83333
2005-11-21	325	8.1	23.3047	6.11111
2005-11-22	326	8	19.7651	4.44444
2005-11-23	327	7.4	18.6608	5
2005-11-24	328	7.4	18.2927	3.61111
2005-11-25	329	7.9	21.7756	6.11111
2005-11-26	330	7.4	24.041	4.16667
2005-11-27	331	6.8	21.0394	3.33333
2005-11-28	332	6.2	19.9917	2.5
2005-11-29	333	6.6	17.8113	3.05556
2005-11-30	334	6.8	14.0451	4.16667
2005-12-01	335	6.2	13.4505	1.66667
2005-12-02	336	5.9	13.5921	1.38889
2005-12-03	337	6.6	12.7709	1.66667
2005-12-04	338	6.2	13.5354	1.38889
2005-12-05	339	7	13.1107	5
2005-12-06	340	7.2	12.2895	5.55556
2005-12-07	341	6.3	12.063	3.61111
2005-12-08	342	5.85	12.0063	2.77778
2005-12-09	343	5.4	11.9497	3.05556
2005-12-10	344	5.1	11.7232	3.33333
2005-12-11	345	5.1	11.6948	2.22222
2005-12-12	346	5.7	11.6099	3.88889
2005-12-13	347	6.1	11.5249	3.33333
2005-12-14	348	5	11.4117	1.38889
2005-12-15	349	4.4	11.44	0.555556
2005-12-16	350	4.1	11.4117	0
2005-12-17	351	4.4	11.2984	4.16667
2005-12-18	352	4	11.2135	4.72222
2005-12-19	353	5.6	10.9869	5.83333
2005-12-20	354	7.1	11.0436	10.5556
2005-12-21	355	7.2	11.6948	11.3889
2005-12-22	356	7.2	13.1673	11.9444
2005-12-23	357	7.4	16.1972	11.6667
2005-12-24	358	8	37.095	14.1667
2005-12-25	359	8.4	31.998	12.2222
2005-12-26	360	8	31.7148	10
2005-12-27	361	7.3	37.095	10.2778
2005-12-28	362	7.4	37.6613	9.44444
2005-12-29	363	7.2	36.8118	7.77778
2005-12-30	364	7.1	36.5287	8.61111
2005-12-31	365	7.2	45.0237	9.44444
2006-01-01	1	6.9	48.9881	11.1111
2006-01-02	2	6.7	45.3069	7.22222
2006-01-03	3	6.3	43.3247	5.83333
2006-01-04	4	6.3	45.8732	8.88889
2006-01-05	5	6.8	48.4217	10.8333
2006-01-06	6	7.5	46.4396	11.6667
2006-01-07	7	7.8	46.7227	8.88889
2006-01-08	8	7.2	46.4396	6.66667
2006-01-09	9	7.2	54.9346	9.44444
2006-01-10	10	7.6	81.5524	10.2778
2006-01-11	11	7.1	109.303	8.05556
2006-01-12	12	6.6	103.923	7.77778
2006-01-13	13	6.7	107.321	8.61111
2006-01-14	14	6.5	113.834	5.55556
2006-01-15	15	6	101.374	5.55556
2006-01-16	16	6.3	82.4019	8.33333
2006-01-17	17	6.5	90.8969	9.44444
2006-01-18	18	6.6	79.0039	6.66667
2006-01-19	19	6.7	71.3583	7.22222
2006-01-20	20	6.6	71.3583	5.83333
2006-01-21	21	6.5	69.9425	7.5
2006-01-22	22	6.6	67.6772	8.61111
2006-01-23	23	6.8	65.9781	10
2006-01-24	24	6.5	62.0138	9.16667
2006-01-25	25	6.8	54.9346	7.22222
2006-01-26	26	6.9	50.9702	6.94444
2006-01-27	27	6.8	49.5544	6.66667
2006-01-28	28	6.7	52.3861	6.38889
2006-01-29	29	6.6	52.6692	7.77778
2006-01-30	30	7.4	67.6772	9.16667
2006-01-31	31	7.1	61.4475	7.5
2006-02-01	32	7.3	55.7841	8.88889
2006-02-02	33	7.5	52.1029	8.33333
2006-02-03	34	7.5	49.8376	10.2778
2006-02-04	35	7.5	49.8376	8.61111
2006-02-05	36	7.1	46.7227	6.94444
2006-02-06	37	6.7	52.3861	7.22222
2006-02-07	38	6.6	50.4039	8.61111
2006-02-08	39	7.1	50.1207	7.77778
2006-02-09	40	6.1	49.5544	6.94444
2006-02-10	41	5.9	50.9702	9.16667
2006-02-11	42	6.1	49.2712	10.5556
2006-02-12	43	6.3	45.0237	8.05556
2006-02-13	44	6.6	41.9089	6.11111
2006-02-14	45	6.4	35.9623	4.44444
2006-02-15	46	5.9	30.0158	3.33333
2006-02-16	47	5.9	26.3346	3.61111
2006-02-17	48	5.1	22.6534	0.277778
2006-02-18	49	4.6	21.2093	0.833333
2006-02-19	50	5.1	20.6996	3.05556
2006-02-20	51	5.5	20.3031	1.66667
2006-02-21	52	6.8	18.5192	6.11111
2006-02-22	53	7.5	17.8396	8.05556
2006-02-23	54	7.3	20.3315	5
2006-02-24	55	6.4	20.3315	3.33333
2006-02-25	56	6.2	18.321	3.88889
2006-02-26	57	7.3	17.5281	6.66667
2006-02-27	58	8.1	18.5758	6.94444
2006-02-28	59	7.5	23.0499	5
2006-03-01	60	7.2	24.2109	8.61111
2006-03-02	61	7.8	23.5029	7.77778
2006-03-03	62	7.1	22.3136	6.66667
2006-03-04	63	7.8	21.3792	8.05556
2006-03-05	64	7.5	20.6429	9.72222
2006-03-06	65	8.1	20.3598	9.16667
2006-03-07	66	8	20.7562	6.66667
2006-03-08	67	7.3	21.3792	3.33333
2006-03-09	68	6.7	21.9455	3.05556
2006-03-10	69	6.6	24.1542	4.16667
2006-03-11	70	6.5	27.2974	5
2006-03-12	71	6.3	27.0992	5
2006-03-13	72	6.8	23.7578	6.38889
2006-03-14	73	7.6	20.0483	6.94444
2006-03-15	74	7.4	16.8768	6.11111
2006-03-16	75	7.4	15.2344	6.66667
2006-03-17	76	7.8	14.6115	5.55556
2006-03-18	77	7.9	15.6592	6.11111
2006-03-19	78	7.8	14.8663	6.11111
2006-03-20	79	7.9	14.6964	8.33333
2006-03-21	80	8.4	14.1584	8.05556
2006-03-22	81	8.7	14.1867	9.72222
2006-03-23	82	9.2	13.8469	12.5
2006-03-24	83	9.5	14.1584	8.61111
2006-03-25	84	8.8	13.8752	6.94444
2006-03-26	85	8.5	13.5637	6.66667
2006-03-27	86	9.1	13.4505	10.2778
2006-03-28	87	9.6	13.762	10.2778
2006-03-29	88	8.8	13.5637	9.16667
2006-03-30	89	9.2	13.3938	9.72222
2006-03-31	90	10	13.3372	11.1111
2006-04-01	91	9.3	13.762	7.22222
2006-04-02	92	9.2	13.5921	11.1111
2006-04-03	93	9.3	13.3938	11.3889
2006-04-04	94	10	13.5921	8.88889
2006-04-05	95	9.9	13.3938	11.3889
2006-04-06	96	9.8	13.1673	9.16667
2006-04-07	97	9.5	13.139	10.8333
2006-04-08	98	9.6	13.5637	8.61111
2006-04-09	99	9.6	13.6204	10.5556
2006-04-10	100	9.6	13.2239	10.2778
2006-04-11	101	9.6	13.1673	9.72222
2006-04-12	102	9.8	13.2806	11.1111
2006-04-13	103	9.2	13.5071	8.05556
2006-04-14	104	8.8	18.6891	6.11111
2006-04-15	105	8	19.7368	6.66667
2006-04-16	106	8.6	15.7725	7.77778
2006-04-17	107	9.2	14.1301	7.5
2006-04-18	108	9.7	13.7336	8.88889
2006-04-19	109	10.3	13.2523	11.6667
2006-04-20	110	10.8	13.139	11.9444
2006-04-21	111	10.7	14.2434	8.61111
2006-04-22	112	9.8	13.7336	9.16667
2006-04-23	113	10.6	13.3655	13.8889
2006-04-24	114	11.3	13.139	15.5556
2006-04-25	115	11.6	12.2045	12.7778
2006-04-26	116	10.4	11.2135	9.72222
2006-04-27	117	11.5	10.3073	14.1667
2006-04-28	118	12.5	9.99583	16.1111
2006-04-29	119	11.2	10.5905	8.05556
2006-04-30	120	9.9	10.5622	8.05556
2006-05-01	121	10.2	9.96751	9.72222
2006-05-02	122	10.6	9.79761	9.44444
2006-05-03	123	11.2	9.62771	12.7778
2006-05-04	124	12	9.54276	15.5556
2006-05-05	125	12.3	9.34454	15.8333
2006-05-06	126	11.6	8.97643	11.3889
2006-05-07	127	10.7	9.17464	10.5556
2006-05-08	128	11	9.37286	10
2006-05-09	129	11.1	9.20296	10.8333
2006-05-10	130	11.6	8.94811	13.0556
2006-05-11	131	11.7	8.97643	11.9444
2006-05-12	132	11.2	8.83484	10.2778
2006-05-13	133	11.5	9.20296	12.2222
2006-05-14	134	12.3	10.3356	15
2006-05-15	135	13.3	11.355	18.6111
2006-05-16	136	14.3	11.3267	21.6667
2006-05-17	137	13.5	24.1825	18.8889
2006-05-18	138	13	28.8831	18.0556
2006-05-19	139	12.3	22.7384	14.7222
2006-05-20	140	12.7	19.2271	15.5556
2006-05-21	141	12.2	19.2554	14.7222
2006-05-22	142	12.1	18.321	12.7778
2006-05-23	143	11.9	23.1631	13.6111
2006-05-24	144	12.5	30.299	13.8889
2006-05-25	145	12.2	35.6792	12.2222
2006-05-26	146	11.8	31.1485	12.5
2006-05-27	147	11.4	32.2812	12.5
2006-05-28	148	11.2	48.4217	12.2222
2006-05-29	149	11	51.8197	13.8889
2006-05-30	150	11.9	41.6257	15.2778
2006-05-31	151	12.3	40.2099	17.2222
2006-06-01	152	12.4	34.8297	16.6667
2006-06-02	153	12.7	33.9802	15.8333
2006-06-03	154	12.7	30.5821	16.3889
2006-06-04	155	12.9	30.299	15.8333
2006-06-05	156	13	29.4495	16.3889
2006-06-06	157	13.2	27.977	16.3889
2006-06-07	158	12.8	27.0425	15.8333
2006-06-08	159	12.3	25.5701	14.1667
2006-06-09	160	12.1	24.9471	14.1667
2006-06-10	161	12.3	21.3226	15.5556
2006-06-11	162	13.4	18.6608	18.0556
2006-06-12	163	13.3	16.6503	17.7778
2006-06-13	164	12.9	17.8396	16.6667
2006-06-14	165	12.6	15.8574	15
2006-06-15	166	12.8	15.3477	16.3889
2006-06-16	167	13	14.2717	15
2006-06-17	168	12.9	13.9602	16.1111
2006-06-18	169	12.9	13.0257	15.8333
2006-06-19	170	12.8	12.7426	15.5556
2006-06-20	171	13.3	12.2045	15.8333
2006-06-21	172	12.8	11.8081	15.8333
2006-06-22	173	13.1	10.6188	16.3889
[truncated: 4,210 more rows]

## Sheet: Fanno Creek
Date	DOY	Tw	Q (m3/s)	Ta
2003-01-01	1	8.1	3.8794	6.66667
2003-01-02	2	9	4.47405	10
2003-01-03	3	9.6	7.78712	9.44444
2003-01-04	4	9.9	6.54118	10
2003-01-05	5	8.7	3.05821	5
2003-01-06	6	7.8	1.73865	6.11111
2003-01-07	7	7	1.26859	5.55556
2003-01-08	8	6.3	0.95994	3.88889
2003-01-09	9	5.7	0.801365	6.11111
2003-01-10	10	5.8	0.659781	5.55556
2003-01-11	11	5.9	0.787207	4.44444
2003-01-12	12	6.8	4.24752	5
2003-01-13	13	7.8	3.05821	7.22222
2003-01-14	14	8.6	2.94495	7.22222
2003-01-15	15	7.9	1.38186	5
2003-01-16	16	7.5	0.999583	5.55556
2003-01-17	17	7	0.80986	5.55556
2003-01-18	18	6.5	0.696593	4.44444
2003-01-19	19	5.8	0.62297	3.33333
2003-01-20	20	5.9	0.538019	4.44444
2003-01-21	21	6.5	0.495544	5
2003-01-22	22	7	2.61364	8.33333
2003-01-23	23	7.5	1.49513	10.5556
2003-01-24	24	8.6	1.64804	8.88889
2003-01-25	25	9.7	1.35921	10
2003-01-26	26	11.3	4.61564	12.2222
2003-01-27	27	10.4	1.95669	9.44444
2003-01-28	28	9.6	1.27142	7.22222
2003-01-29	29	9.1	3.96435	8.33333
2003-01-30	30	9.9	11.6948	11.6667
2003-01-31	31	11.3	23.8144	11.6667
2003-02-01	32	10.3	16.9901	8.33333
2003-02-02	33	9.9	3.90772	8.33333
2003-02-03	34	9.4	2.49188	6.66667
2003-02-04	35	8.4	1.78962	4.44444
2003-02-05	36	7.8	1.42434	5.55556
2003-02-06	37	7.2	1.15533	6.66667
2003-02-07	38	6.5	0.982593	5.55556
2003-02-08	39	6.4	0.857999	5.55556
2003-02-09	40	6.1	0.756059	4.44444
2003-02-10	41	6.8	0.676772	6.66667
2003-02-11	42	6.6	0.628633	6.66667
2003-02-12	43	6.5	0.620138	7.77778
2003-02-13	44	7.5	0.543683	9.44444
2003-02-14	45	8.7	0.498376	10.5556
2003-02-15	46	8.9	1.46964	8.33333
2003-02-16	47	9	3.3697	8.88889
2003-02-17	48	8.1	9.40118	6.66667
2003-02-18	49	8.3	10.0808	7.77778
2003-02-19	50	9.1	3.42633	7.22222
2003-02-20	51	8.9	2.26818	8.88889
2003-02-21	52	9.5	1.90289	10.5556
2003-02-22	53	9.4	1.53477	7.22222
2003-02-23	54	8.6	1.15533	5
2003-02-24	55	6.1	0.988256	3.88889
2003-02-25	56	5.1	0.866494	5
2003-02-26	57	5.7	0.77588	5
2003-02-27	58	6.55	0.70792	7.77778
2003-02-28	59	7.4	0.843841	6.11111
2003-03-01	60	8.1	0.931623	7.77778
2003-03-02	61	8	0.682435	3.88889
2003-03-03	62	7.7	1.13834	6.66667
2003-03-04	63	7.5	0.67394	5
2003-03-05	64	8.2	0.600316	8.88889
2003-03-06	65	8.6	1.06188	8.33333
2003-03-07	66	8.6	9.5994	7.22222
2003-03-08	67	8.6	5.86158	7.22222
2003-03-09	68	9.5	7.05088	11.1111
2003-03-10	69	10.5	3.45465	12.7778
2003-03-11	70	10.9	2.1634	12.2222
2003-03-12	71	11.1	3.00158	11.6667
2003-03-13	72	11.1	3.82277	13.3333
2003-03-14	73	10.8	3.76613	12.7778
2003-03-15	74	11.2	2.64479	10.5556
2003-03-16	75	10.8	2.48338	9.44444
2003-03-17	76	9.9	2.01332	7.77778
2003-03-18	77	9.6	1.47814	7.77778
2003-03-19	78	9.4	1.95103	9.44444
2003-03-20	79	9.9	1.97368	11.1111
2003-03-21	80	10.4	2.26534	10
2003-03-22	81	10.5	4.81386	10
2003-03-23	82	9.9	3.39802	6.66667
2003-03-24	83	9.1	1.97085	6.66667
2003-03-25	84	10	1.57158	10.5556
2003-03-26	85	10.1	3.14316	8.33333
2003-03-27	86	9.9	2.2795	8.33333
2003-03-28	87	10.3	1.63388	9.44444
2003-03-29	88	11.2	1.17232	13.3333
2003-03-30	89	12.5	1.01657	15
2003-03-31	90	13.2	1.01657	12.7778
2003-04-01	91	11.8	1.33089	7.77778
2003-04-02	92	10	1.44982	6.11111
2003-04-03	93	8.5	2.34746	6.66667
2003-04-04	94	9.2	1.7613	7.22222
2003-04-05	95	9.2	1.35071	6.11111
2003-04-06	96	9	2.94495	8.88889
2003-04-07	97	10.4	1.78962	10.5556
2003-04-08	98	11.6	1.4215	13.8889
2003-04-09	99	12.5	1.63954	11.1111
2003-04-10	100	12.6	1.48663	12.2222
2003-04-11	101	12.7	1.15533	13.8889
2003-04-12	102	12.2	6.34296	13.3333
2003-04-13	103	12.2	9.91088	11.6667
2003-04-14	104	11.8	4.3891	10
2003-04-15	105	11.6	2.2257	11.1111
2003-04-16	106	12.4	1.68768	12.2222
2003-04-17	107	12.2	3.34138	10
2003-04-18	108	11.9	1.78113	10.5556
2003-04-19	109	12.3	1.23461	11.6667
2003-04-20	110	13	1.04206	12.7778
2003-04-21	111	12.3	2.3418	10
2003-04-22	112	11.8	1.10436	11.1111
2003-04-23	113	12.1	2.51736	9.44444
2003-04-24	114	11.5	4.19089	8.33333
2003-04-25	115	11.3	2.2342	8.88889
2003-04-26	116	11.2	2.63913	10
2003-04-27	117	11.6	1.5461	11.1111
2003-04-28	118	13	1.24311	14.4444
2003-04-29	119	12.85	1.90855	12.7778
2003-04-30	120	12.7	6.3996	13.8889
2003-05-01	121	13.4	2.03031	13.8889
2003-05-02	122	14.5	1.38752	15
2003-05-03	123	14.1	1.17515	10.5556
2003-05-04	124	12.4	1.97085	11.6667
2003-05-05	125	12.6	1.06754	11.6667
2003-05-06	126	13	0.835346	12.2222
2003-05-07	127	12.4	0.801365	8.33333
2003-05-08	128	11.1	2.01332	10.5556
2003-05-09	129	11.8	0.778712	11.6667
2003-05-10	130	12.1	0.63996	11.6667
2003-05-11	131	12.6	0.591821	13.8889
2003-05-12	132	13.5	0.571999	13.8889
2003-05-13	133	14	0.501207	16.1111
2003-05-14	134	14.8	0.458732	14.4444
2003-05-15	135	13.5	0.447405	10.5556
2003-05-16	136	12.2	1.40734	8.33333
2003-05-17	137	11.5	1.81794	7.22222
2003-05-18	138	10.8	1.47814	10.5556
2003-05-19	139	13	0.659781	13.8889
2003-05-20	140	14.1	0.538019	13.8889
2003-05-21	141	15.4	0.504039	17.2222
2003-05-22	142	17	0.472891	18.8889
2003-05-23	143	18.2	0.43891	21.6667
2003-05-24	144	18.8	0.419089	18.3333
2003-05-25	145	17.8	0.453069	15.5556
2003-05-26	146	16.8	0.396435	16.1111
2003-05-27	147	17.8	0.376613	20.5556
2003-05-28	148	18.8	0.382277	20
2003-05-29	149	19.1	0.393604	19.4444
2003-05-30	150	18.1	0.424752	15.5556
2003-05-31	151	17.2	0.376613	17.7778
2003-06-01	152	17.8	0.339802	17.2222
2003-06-02	153	17.6	0.382277	16.1111
2003-06-03	154	17.9	0.390772	18.8889
2003-06-04	155	18.7	0.328475	22.2222
2003-06-05	156	19.8	0.271558	24.4444
2003-06-06	157	20.8	0.243241	26.1111
2003-06-07	158	21.5	0.230499	24.4444
2003-06-08	159	21	0.224269	19.4444
2003-06-09	160	19	0.242675	16.1111
2003-06-10	161	17.7	0.278071	17.2222
2003-06-11	162	17.7	0.267877	18.3333
2003-06-12	163	17.4	0.254285	15
2003-06-13	164	16.9	0.424752	16.6667
2003-06-14	165	17.2	0.40493	17.2222
2003-06-15	166	17.6	0.274107	18.8889
2003-06-16	167	18.5	0.254851	21.1111
2003-06-17	168	19.5	0.239843	23.3333
2003-06-18	169	18.9	0.21634	16.6667
2003-06-19	170	17	0.222287	13.3333
2003-06-20	171	16.3	0.419089	15
2003-06-21	172	16.4	0.436079	13.3333
2003-06-22	173	15.6	0.348297	13.3333
2003-06-23	174	15.2	0.311485	15
2003-06-24	175	15.7	0.27977	17.2222
2003-06-25	176	17.15	0.230499	20
2003-06-26	177	18.6	0.202182	22.7778
2003-06-27	178	20.1	0.186325	23.8889
2003-06-28	179	20.7	0.185475	25
2003-06-29	180	21.3	0.184342	25.5556
2003-06-30	181	20.4	0.174998	18.8889
2003-07-01	182	19	0.173582	17.7778
2003-07-02	183	18.1	0.197934	18.3333
2003-07-03	184	18.4	0.188024	19.4444
2003-07-04	185	18.9	0.180095	19.4444
2003-07-05	186	19.1	0.178396	18.8889
2003-07-06	187	19.3	0.178396	20
2003-07-07	188	19.7	0.174998	20
2003-07-08	189	19.3	0.172166	19.4444
2003-07-09	190	19.4	0.167069	22.2222
2003-07-10	191	20.3	0.166786	23.8889
2003-07-11	192	20.75	0.16622	22.2222
2003-07-12	193	21.2	0.160839	22.7778
2003-07-13	194	20.6	0.152061	21.6667
2003-07-14	195	20.1	0.148946	21.6667
2003-07-15	196	20.5	0.146681	21.6667
2003-07-16	197	20.3	0.144699	21.1111
2003-07-17	198	20	0.13762	21.6667
2003-07-18	199	20.4	0.143	23.8889
2003-07-19	200	20.9	0.151778	24.4444
2003-07-20	201	21.3	0.142717	23.8889
2003-07-21	202	22.3	0.132806	26.6667
2003-07-22	203	22.5	0.135071	24.4444
2003-07-23	204	21.9	0.158291	21.6667
2003-07-24	205	21.1	0.156309	20
2003-07-25	206	20.3	0.174431	20.5556
2003-07-26	207	20.2	0.146964	21.1111
2003-07-27	208	20.3	0.146964	23.3333
2003-07-28	209	21.1	0.14923	26.6667
2003-07-29	210	21.8	0.173299	27.2222
2003-07-30	211	22.4	0.171883	27.2222
2003-07-31	212	22.2	0.143	22.2222
2003-08-01	213	21.5	0.144133	21.1111
2003-08-02	214	20.6	0.158008	20
2003-08-03	215	19.8	0.160839	19.4444
2003-08-04	216	19.5	0.158857	21.6667
2003-08-05	217	19.4	0.175847	17.7778
2003-08-06	218	19.4	0.177546	21.1111
2003-08-07	219	20.1	0.16622	22.2222
2003-08-08	220	20	1.49513	21.1111
2003-08-09	221	20.7	0.368118	22.2222
2003-08-10	222	20.3	0.244374	21.6667
2003-08-11	223	20.1	0.196519	20.5556
2003-08-12	224	19.7	0.154893	19.4444
2003-08-13	225	19.5	0.148946	21.1111
2003-08-14	226	19.9	0.125443	24.4444
2003-08-15	227	20.3	0.125443	21.6667
2003-08-16	228	19.5	0.129125	21.1111
2003-08-17	229	20	0.12516	23.3333
2003-08-18	230	20.05	0.121479	23.8889
2003-08-19	231	20.1	0.110719	21.1111
2003-08-20	232	19	0.109303	21.1111
2003-08-21	233	19.3	0.0931623	22.7778
2003-08-22	234	19	0.115533	18.8889
2003-08-23	235	18	0.107321	18.3333
2003-08-24	236	17.9	0.102507	20.5556
2003-08-25	237	18.4	0.112135	23.3333
2003-08-26	238	18.6	0.110719	20
2003-08-27	239	18.4	0.126293	20.5556
2003-08-28	240	18.1	0.155742	21.1111
2003-08-29	241	18.5	0.102507	22.2222
2003-08-30	242	19.1	0.0934454	24.4444
2003-08-31	243	18.9	0.0914633	21.1111
2003-09-01	244	18.2	0.0795702	21.1111
2003-09-02	245	18.2	0.0693762	23.8889
2003-09-03	246	19.1	0.0747564	25.5556
2003-09-04	247	19.6	0.0753227	26.1111
2003-09-05	248	20	0.070792	25
2003-09-06	249	19.7	0.0764554	20
2003-09-07	250	19	0.331307	18.3333
2003-09-08	251	18	0.937286	17.2222
2003-09-09	252	16.5	2.91663	15.5556
2003-09-10	253	16.5	0.546514	17.7778
2003-09-11	254	17.1	0.260798	20.5556
2003-09-12	255	17.1	0.193121	17.7778
2003-09-13	256	16.4	0.156875	18.8889
2003-09-14	257	16.2	0.132806	17.7778
2003-09-15	258	15.4	0.124594	14.4444
2003-09-16	259	15.2	0.31998	13.8889
2003-09-17	260	14.9	0.297326	15
2003-09-18	261	15	0.146115	16.6667
2003-09-19	262	15	0.125727	17.7778
2003-09-20	263	15.1	0.109586	16.6667
2003-09-21	264	15.1	0.104489	18.3333
2003-09-22	265	15.4	0.0934454	20.5556
2003-09-23	266	15.6	0.095994	18.3333
2003-09-24	267	16	0.0934454	21.6667
2003-09-25	268	16.2	0.0908969	20
2003-09-26	269	16.7	0.0906138	23.3333
2003-09-27	270	17	0.107604	23.8889
2003-09-28	271	17.3	0.0764554	21.1111
2003-09-29	272	16.9	0.0857999	16.6667
2003-09-30	273	16.4	0.0957108	18.3333
2003-10-01	274	16.1	0.0872157	16.6667
2003-10-02	275	16.1	0.0928791	16.1111
2003-10-03	276	16	0.097693	18.8889
2003-10-04	277	15.8	0.0951444	15.5556
2003-10-05	278	15.8	0.0954276	16.1111
2003-10-06	279	15.4	0.356792	16.1111
2003-10-07	280	16.1	1.00808	15.5556
2003-10-08	281	15.2	0.334138	15
2003-10-09	282	14.1	1.33372	12.2222
2003-10-10	283	13.3	1.04206	13.3333
2003-10-11	284	12.6	1.0194	11.1111
2003-10-12	285	12.8	1.35921	13.8889
2003-10-13	286	13.1	0.583326	13.8889
2003-10-14	287	13	0.543683	12.2222
2003-10-15	288	12.4	0.753227	11.6667
2003-10-16	289	12.8	0.968435	16.6667
2003-10-17	290	13.5	0.410594	18.8889
2003-10-18	291	14.2	0.230782	16.1111
2003-10-19	292	14.6	1.27142	17.7778
2003-10-20	293	15.6	0.447405	21.1111
2003-10-21	294	16.5	0.37095	22.2222
2003-10-22	295	16.7	0.22257	16.6667
2003-10-23	296	15.2	0.342633	12.7778
2003-10-24	297	13.7	0.215774	12.7778
2003-10-25	298	12.2	0.148946	14.4444
2003-10-26	299	12.2	0.121479	15
2003-10-27	300	12.1	0.120913	14.4444
2003-10-28	301	13.3	0.124028	16.6667
2003-10-29	302	12.5	0.297326	8.33333
2003-10-30	303	10.7	0.325643	7.77778
2003-10-31	304	7.9	0.166503	4.44444
2003-11-01	305	6.4	0.124594	2.22222
2003-11-02	306	6.2	0.122329	5
2003-11-03	307	5.5	0.112701	4.44444
2003-11-04	308	5.6	0.113834	5
2003-11-05	309	5.4	0.112984	5
2003-11-06	310	5.4	0.109303	5.55556
2003-11-07	311	5.9	0.111002	15
2003-11-08	312	6.5	0.130824	7.22222
2003-11-09	313	7.2	0.123744	10
2003-11-10	314	8	0.133938	10
2003-11-11	315	9	0.152628	10.5556
2003-11-12	316	8.4	0.149796	8.88889
2003-11-13	317	7.9	0.122612	8.88889
2003-11-14	318	8.55	0.112984	10.5556
2003-11-15	319	9.2	0.515366	9.44444
2003-11-16	320	9.3	1.73016	10
2003-11-17	321	9.2	0.996751	10
2003-11-18	322	10.3	1.05622	13.8889
2003-11-19	323	9.1	7.56059	7.22222
2003-11-20	324	7.3	3.93604	5.55556
2003-11-21	325	7.1	1.30257	2.77778
2003-11-22	326	5.9	0.642791	0.555556
2003-11-23	327	6	0.444574	5.55556
2003-11-24	328	6.8	0.7419	6.66667
2003-11-25	329	6.8	1.38186	7.22222
2003-11-26	330	7	1.144	7.77778
2003-11-27	331	6.8	0.631465	5.55556
2003-11-28	332	7.5	0.812692	9.44444
2003-11-29	333	9.1	7.02257	10.5556
2003-11-30	334	9.2	1.5914	8.88889
2003-12-01	335	8.8	1.35637	6.66667
2003-12-02	336	8.9	0.991088	9.44444
2003-12-03	337	9.1	2.75522	5.55556
2003-12-04	338	8.1	1.35354	7.22222
2003-12-05	339	8.3	6.17306	8.88889
2003-12-06	340	9	4.16257	7.77778
2003-12-07	341	8.1	3.73782	6.11111
2003-12-08	342	8.3	1.55176	6.11111
2003-12-09	343	7.9	1.10436	4.44444
2003-12-10	344	7.4	2.05297	5
2003-12-11	345	7.6	1.31107	6.66667
2003-12-12	346	8.3	2.20022	7.77778
2003-12-13	347	8.9	8.83484	6.11111
2003-12-14	348	7.5	13.8469	5.55556
2003-12-15	349	7.6	3.51128	6.11111
2003-12-16	350	7.5	2.03598	7.22222
2003-12-17	351	8	1.74431	6.11111
2003-12-18	352	7.6	1.07038	7.22222
2003-12-19	353	7	0.889148	7.22222
2003-12-20	354	7.8	1.59424	7.22222
2003-12-21	355	8.8	2.88831	7.77778
2003-12-22	356	8	1.19497	7.22222
2003-12-23	357	7.7	0.908969	7.77778
2003-12-24	358	7.4	3.76613	7.77778
2003-12-25	359	7.3	6.0598	5
2003-12-26	360	6.9	2.02748	3.33333
2003-12-27	361	6.1	4.67227	4.44444
2003-12-28	362	6.4	5.86158	3.88889
2003-12-29	363	5.3	9.06138	2.22222
2003-12-30	364	4.9	3.59623	-0.555556
2003-12-31	365	5.1	3.31307	1.11111
2004-01-01	1	4.9	2.7977	1.66667
2004-01-02	2	4.7	3.73782	3.33333
2004-01-03	3	5.4	3.39802	3.88889
2004-01-04	4	5.3	2.18323	-0.555556
2004-01-05	5	2.8	1.40168	-5.55556
2004-01-06	6	0.4	1.16099	-6.11111
2004-01-07	7	0.3	1.15533	1.66667
2004-01-08	8	1.6	1.61972	0.555556
2004-01-09	9	2.7	3.65287	1.11111
2004-01-10	10	3.7	4.67227	2.22222
2004-01-11	11	4.3	3.68118	1.66667
2004-01-12	12	4.9	3.22812	3.33333
2004-01-13	13	5.5	3.0299	4.44444
2004-01-14	14	6.15	4.50237	5
2004-01-15	15	6.8	4.2192	5.55556
2004-01-16	16	7.7	2.46073	6.11111
2004-01-17	17	7.6	1.79529	4.44444
2004-01-18	18	7.1	2.83168	4.44444
2004-01-19	19	7.6	2.88831	4.44444
2004-01-20	20	7	1.82643	3.88889
2004-01-21	21	6	1.35071	2.77778
2004-01-22	22	5.5	1.13834	1.66667
2004-01-23	23	6.5	4.3891	5
2004-01-24	24	7.7	6.45623	6.11111
2004-01-25	25	6.8	2.65612	5.55556
2004-01-26	26	7.1	2.03598	7.77778
2004-01-27	27	7.6	1.82927	6.66667
2004-01-28	28	8.4	2.80619	10
2004-01-29	29	9.2	8.49504	12.7778
2004-01-30	30	8.7	8.49504	8.33333
2004-01-31	31	7.4	3.73782	6.11111
2004-02-01	32	7.2	2.86	5
2004-02-02	33	7.2	3.8794	7.22222
2004-02-03	34	7.2	2.16907	6.66667
2004-02-04	35	7.9	1.79245	6.11111
2004-02-05	36	7.5	1.34788	5.55556
2004-02-06	37	7.7	2.06713	7.22222
2004-02-07	38	7.9	1.50362	6.66667
2004-02-08	39	7.6	1.16099	6.11111
2004-02-09	40	7.3	0.991088	6.11111
2004-02-10	41	6.95	0.891979	6.11111
2004-02-11	42	6.6	0.818356	7.22222
2004-02-12	43	6.5	0.7419	8.88889
2004-02-13	44	6	0.702257	6.11111
2004-02-14	45	6.7	1.24028	6.66667
2004-02-15	46	7.8	2.42675	8.88889
2004-02-16	47	8	4.98376	7.22222
2004-02-17	48	7.7	5.04039	6.11111
2004-02-18	49	8.5	5.49346	9.44444
2004-02-19	50	8.8	2.64196	7.77778
2004-02-20	51	7.9	1.80661	6.66667
2004-02-21	52	8	1.46398	8.88889
2004-02-22	53	8.6	1.21479	10.5556
2004-02-23	54	8.75	1.05338	10
2004-02-24	55	8.9	1.80095	7.77778
2004-02-25	56	8.4	2.23703	7.22222
2004-02-26	57	8.3	3.76613	8.33333
2004-02-27	58	8.5	5.01207	8.33333
2004-02-28	59	8.8	3.68118	8.88889
2004-02-29	60	9.1	2.15774	8.33333
2004-03-01	61	9.1	3.11485	9.44444
2004-03-02	62	9.2	1.61123	8.33333
2004-03-03	63	8.4	1.99633	6.11111
2004-03-04	64	8.6	1.52061	8.88889
2004-03-05	65	8.9	1.27426	8.88889
2004-03-06	66	8.8	1.06471	7.77778
2004-03-07	67	10.1	0.914633	13.3333
2004-03-08	68	11.2	0.818356	14.4444
2004-03-09	69	10.95	0.770217	11.1111
2004-03-10	70	10.7	0.693762	9.44444
2004-03-11	71	10.4	0.65695	11.6667
2004-03-12	72	10.7	0.608811	9.44444
2004-03-13	73	10.5	0.560673	10
2004-03-14	74	11.1	0.521029	12.7778
2004-03-15	75	11.7	0.492712	12.2222
2004-03-16	76	11.5	0.472891	10.5556
2004-03-17	77	11.8	0.458732	11.1111
2004-03-18	78	11.5	0.637128	9.44444
2004-03-19	79	10.5	0.70792	8.88889
2004-03-20	80	10.3	0.424752	10.5556
2004-03-21	81	11.1	0.390772	15.5556
2004-03-22	82	12.8	0.396435	16.1111
2004-03-23	83	13.7	0.385108	13.3333
2004-03-24	84	12.9	0.863662	11.1111
2004-03-25	85	11.65	1.37903	8.88889
2004-03-26	86	10.4	2.48905	8.88889
2004-03-27	87	10.1	2.56833	10.5556
2004-03-28	88	11	0.826851	11.6667
2004-03-29	89	12.4	0.642791	18.3333
2004-03-30	90	12.9	0.617306	8.33333
2004-03-31	91	11.3	0.543683	7.77778
2004-04-01	92	10.5	0.467227	8.88889
2004-04-02	93	10.8	0.399267	12.7778
2004-04-03	94	12.4	0.390772	16.6667
2004-04-04	95	13.1	0.348297	12.7778
2004-04-05	96	12.3	0.328475	11.1111
2004-04-06	97	12.1	0.33697	12.7778
2004-04-07	98	12.3	0.305821	13.3333
2004-04-08	99	12.7	0.305821	13.8889
2004-04-09	100	13.2	0.277505	15.5556
2004-04-10	101	14.2	0.269293	17.2222
2004-04-11	102	15.1	0.30299	18.3333
2004-04-12	103	15	0.33697	13.3333
2004-04-13	104	14.1	0.342633	12.7778
2004-04-14	105	12.7	1.19497	11.1111
2004-04-15	106	11.8	2.2257	10.5556
2004-04-16	107	12.2	0.903306	12.2222
2004-04-17	108	11.9	1.50645	12.2222
2004-04-18	109	12.3	0.62297	10.5556
2004-04-19	110	11.7	0.744732	10.5556
2004-04-20	111	11.3	1.28841	9.44444
2004-04-21	112	11.8	1.144	12.2222
2004-04-22	113	12.3	0.60598	12.7778
2004-04-23	114	12.5	0.453069	12.2222
2004-04-24	115	12	0.40493	11.1111
2004-04-25	116	12.9	0.356792	17.7778
2004-04-26	117	14.9	0.342633	20
2004-04-27	118	16	0.331307	16.1111
2004-04-28	119	15	0.286	15
2004-04-29	120	15	0.280619	16.6667
2004-04-30	121	15.7	0.273257	20
2004-05-01	122	16.3	0.261647	19.4444
2004-05-02	123	16.8	0.242675	18.8889
2004-05-03	124	17.2	0.247206	18.8889
2004-05-04	125	16.8	0.244657	15.5556
2004-05-05	126	15.8	0.249471	14.4444
2004-05-06	127	15.7	0.250604	15.5556
2004-05-07	128	15.6	0.487049	16.6667
2004-05-08	129	15.7	0.546514	15
2004-05-09	130	15.8	0.393604	14.4444
2004-05-10	131	14.7	0.42192	12.7778
2004-05-11	132	14.1	0.682435	13.8889
2004-05-12	133	14	0.362455	15
2004-05-13	134	14.4	0.291663	14.4444
2004-05-14	135	15	0.264196	15.5556
2004-05-15	136	14.6	0.244374	13.3333
2004-05-16	137	14.6	0.281469	16.1111
2004-05-17	138	15.2	0.248905	18.3333
2004-05-18	139	15.5	0.294495	16.6667
2004-05-19	140	15.7	0.240126	15.5556
2004-05-20	141	15.6	0.227384	15.5556
2004-05-21	142	15.4	0.206146	15
2004-05-22	143	14.8	0.202465	14.4444
2004-05-23	144	15	0.209544	16.6667
2004-05-24	145	15.7	0.206429	18.8889
2004-05-25	146	16.6	0.179245	15
2004-05-26	147	16.6	0.172166	16.6667
2004-05-27	148	15.8	1.05622	13.8889
2004-05-28	149	15.3	1.41867	13.8889
2004-05-29	150	14.7	0.4559	12.7778
2004-05-30	151	14.8	0.308653	15.5556
2004-05-31	152	15	0.257117	15
2004-06-01	153	15.6	0.226534	16.1111
2004-06-02	154	16.8	0.204164	18.3333
2004-06-03	155	17.85	0.186041	21.1111
2004-06-04	156	18.9	0.175281	21.1111
2004-06-05	157	18.2	0.543683	16.6667
2004-06-06	158	16.4	0.914633	14.4444
2004-06-07	159	16	0.928791	15
2004-06-08	160	15.7	1.37903	16.1111
2004-06-09	161	16	1.25727	15.5556
2004-06-10	162	15.7	0.603148	14.4444
2004-06-11	163	15.1	0.342633	13.8889
2004-06-12	164	15.4	0.283168	15.5556
2004-06-13	165	15.8	0.250604	17.2222
2004-06-14	166	15.8	0.223703	15.5556
2004-06-15	167	16.4	0.192554	17.7778
2004-06-16	168	17.5	0.174998	20.5556
2004-06-17	169	18.7	0.153477	22.7778
2004-06-18	170	19.8	0.146115	23.8889
2004-06-19	171	20	0.138752	22.2222
2004-06-20	172	20	0.128275	22.7778
2004-06-21	173	20.6	0.125727	23.8889
2004-06-22	174	19.7	0.125443	17.2222
2004-06-23	175	18.3	0.215491	17.7778
2004-06-24	176	17.9	0.197934	18.3333
2004-06-25	177	18.4	0.166786	20.5556
2004-06-26	178	19.1	0.158291	20
2004-06-27	179	19.7	0.134505	20.5556
2004-06-28	180	19.8	0.127709	21.1111
2004-06-29	181	20	0.122895	21.1111
2004-06-30	182	20.1	0.119497	20.5556
2004-07-01	183	20.4	0.134788	20
2004-07-02	184	20.1	0.137903	18.8889
2004-07-03	185	19.8	0.129408	19.4444
2004-07-04	186	19.2	0.121479	18.8889
2004-07-05	187	19.6	0.118647	20.5556
2004-07-06	188	20.1	0.112135	20.5556
2004-07-07	189	19.1	0.16622	18.3333
2004-07-08	190	18.1	0.203598	17.7778
2004-07-09	191	18	0.14215	18.3333
2004-07-10	192	18.2	0.118364	18.8889
2004-07-11	193	18.3	0.112418	20
2004-07-12	194	19.6	0.101091	24.4444
2004-07-13	195	20.9	0.10902	23.3333
2004-07-14	196	21.4	0.120346	23.8889
2004-07-15	197	21.2	0.109303	21.6667
2004-07-16	198	21.3	0.0991088	23.3333
2004-07-17	199	21.4	0.0985425	23.3333
2004-07-18	200	21.3	0.0985425	23.8889
2004-07-19	201	21.3	0.105338	22.7778
2004-07-20	202	21.1	0.0951444	22.7778
2004-07-21	203	21	0.105055	22.7778
2004-07-22	204	21.6	0.0991088	26.6667
2004-07-23	205	22.4	0.103356	28.8889
2004-07-24	206	23.2	0.108453	28.3333
2004-07-25	207	22.7	0.0869326	21.6667
2004-07-26	208	21.3	0.0894811	21.6667
2004-07-27	209	21.5	0.107604	23.3333
2004-07-28	210	21.9	0.0877821	23.8889
2004-07-29	211	22.2	0.0824019	23.8889
2004-07-30	212	21.6	0.144982	20.5556
2004-07-31	213	21	0.0744732	21.6667
2004-08-01	214	21.4	0.0784375	22.2222
2004-08-02	215	21.2	0.0843841	20.5556
2004-08-03	216	21	0.146681	21.1111
2004-08-04	217	20.6	0.182077	21.1111
2004-08-05	218	19	0.512534	19.4444
2004-08-06	219	18	0.62297	18.8889
2004-08-07	220	18.9	0.424752	20.5556
2004-08-08	221	19.5	0.15461	25
2004-08-09	222	20.8	0.126576	27.7778
2004-08-10	223	21.4	0.0900474	25.5556
2004-08-11	224	22	0.0849504	25
2004-08-12	225	22.4	0.0843841	25
2004-08-13	226	21.9	0.0855167	23.8889
2004-08-14	227	21.8	0.0838177	23.8889
2004-08-15	228	21.5	0.0773049	23.3333
2004-08-16	229	21.6	0.0798534	23.8889
2004-08-17	230	21.6	0.077588	23.8889
2004-08-18	231	21.6	0.0798534	24.4444
2004-08-19	232	21.6	0.0863662	24.4444
2004-08-20	233	21.6	0.080986	23.8889
2004-08-21	234	21.3	0.112701	23.3333
2004-08-22	235	20	4.07762	17.7778
2004-08-23	236	18.8	2.19455	17.2222
2004-08-24	237	18.7	0.80986	18.3333
2004-08-25	238	18.4	3.51128	18.3333
2004-08-26	239	18.1	2.51453	18.8889
2004-08-27	240	18.8	1.29408	19.4444
2004-08-28	241	18.6	0.458732	19.4444
2004-08-29	242	18.7	0.33697	21.6667
2004-08-30	243	19.2	0.270425	22.7778
2004-08-31	244	19.8	0.219455	22.7778
2004-09-01	245	19.6	0.254002	19.4444
2004-09-02	246	18.3	0.300158	17.7778
2004-09-03	247	17.7	0.26816	16.6667
2004-09-04	248	17.5	0.180944	17.2222
2004-09-05	249	17.2	0.163388	18.8889
2004-09-06	250	17.1	0.15914	18.8889
2004-09-07	251	17.2	0.140168	18.8889
2004-09-08	252	17.4	0.13677	19.4444
2004-09-09	253	17.3	0.132239	21.6667
2004-09-10	254	17.75	0.139319	18.8889
2004-09-11	255	18.2	0.225968	18.8889
2004-09-12	256	17.6	0.184909	17.2222
2004-09-13	257	17.2	0.35396	17.7778
2004-09-14	258	16.9	0.308653	16.6667
2004-09-15	259	16.8	0.248338	17.7778
2004-09-16	260	16.4	0.260515	16.6667
2004-09-17	261	15.6	2.94495	14.4444
2004-09-18	262	14.8	1.67352	12.7778
2004-09-19	263	14.2	0.654118	12.7778
2004-09-20	264	14	0.588989	14.4444
2004-09-21	265	14	0.311485	14.4444
2004-09-22	266	14.1	0.20558	14.4444
2004-09-23	267	14.7	0.184626	17.2222
2004-09-24	268	15.3	0.159707	18.3333
2004-09-25	269	15.5	0.154893	17.7778
2004-09-26	270	16.3	0.130257	18.3333
2004-09-27	271	16.4	0.130257	20
2004-09-28	272	16.5	0.144416	20
2004-09-29	273	16.5	0.124877	16.6667
2004-09-30	274	16.1	0.118081	17.2222
2004-10-01	275	15.4	0.11355	18.3333
2004-10-02	276	15	0.0968435	17.2222
2004-10-03	277	14.8	0.0988256	17.2222
2004-10-04	278	14.7	0.10279	17.7778
2004-10-05	279	14.7	0.112701	17.7778
2004-10-06	280	16.4	1.90289	16.6667
2004-10-07	281	16	0.373782	15.5556
2004-10-08	282	15.5	1.72732	15.5556
2004-10-09	283	14.9	2.49188	13.3333
2004-10-10	284	14.3	0.841009	13.8889
2004-10-11	285	13.6	0.38794	15
2004-10-12	286	13.8	0.270425	16.6667
2004-10-13	287	14.1	0.211243	20
2004-10-14	288	14.4	0.183776	17.7778
2004-10-15	289	14.8	0.176697	15.5556
2004-10-16	290	14.9	0.174715	16.1111
2004-10-17	291	14.6	1.54893	12.2222
2004-10-18	292	13.5	1.16665	11.1111
2004-10-19	293	12.9	1.49796	13.8889
2004-10-20	294	13.1	0.784375	12.7778
2004-10-21	295	13	0.710752	11.1111
2004-10-22	296	12.4	0.393604	11.1111
2004-10-23	297	12.1	0.40493	9.44444
2004-10-24	298	11.2	0.509702	9.44444
2004-10-25	299	10.5	0.608811	7.77778
2004-10-26	300	10.8	1.56592	10
2004-10-27	301	10.9	1.26293	10.5556
2004-10-28	302	11	0.472891	8.88889
2004-10-29	303	11.4	0.416257	11.6667
2004-10-30	304	11.5	1.2601	10
2004-10-31	305	10.9	0.750395	7.77778
2004-11-01	306	10.2	0.654118	10
2004-11-02	307	10.4	3.65287	11.1111
2004-11-03	308	10.5	2.70425	7.77778
2004-11-04	309	9.2	0.713583	7.22222
2004-11-05	310	8.1	0.495544	5.55556
2004-11-06	311	7.6	0.396435	5
2004-11-07	312	7.8	0.322812	7.77778
2004-11-08	313	7.8	0.339802	7.77778
2004-11-09	314	8.2	0.277221	8.33333
2004-11-10	315	8.7	0.251736	9.44444
2004-11-11	316	9	0.297326	10
2004-11-12	317	9.1	0.233047	8.88889
2004-11-13	318	9.4	0.216907	9.44444
2004-11-14	319	9.6	0.23333	10.5556
2004-11-15	320	9.9	1.2516	10
2004-11-16	321	10.4	1.24028	10
2004-11-17	322	10.2	0.529524	10.5556
2004-11-18	323	10	1.56592	9.44444
2004-11-19	324	9.4	0.637128	7.22222
2004-11-20	325	8	0.407762	5.55556
2004-11-21	326	6.7	0.30299	3.33333
2004-11-22	327	6.8	0.279487	6.66667
2004-11-23	328	7.8	0.382277	9.44444
2004-11-24	329	9.3	0.458732	13.3333
2004-11-25	330	10.2	0.608811	8.88889
2004-11-26	331	9	0.396435	5
2004-11-27	332	8.1	0.597484	5
2004-11-28	333	6.6	0.419089	1.11111
2004-11-29	334	6	0.359623	3.33333
2004-11-30	335	6.55	1.39602	6.11111
2004-12-01	336	7.1	0.75889	4.44444
2004-12-02	337	6.4	0.458732	3.33333
2004-12-03	338	6.4	0.342633	5.55556
2004-12-04	339	6.5	0.342633	5.55556
2004-12-05	340	6.9	0.883484	5.55556
2004-12-06	341	6.9	1.25727	6.11111
2004-12-07	342	7.5	2.15208	7.22222
2004-12-08	343	8.2	6.88098	9.44444
2004-12-09	344	9	1.91138	11.1111
2004-12-10	345	10.8	2.30782	15
2004-12-11	346	11.2	3.00158	11.1111
2004-12-12	347	9.4	1.17798	9.44444
2004-12-13	348	8.3	1.41867	7.77778
2004-12-14	349	8.8	3.14316	9.44444
2004-12-15	350	8.9	1.05622	5
2004-12-16	351	8.25	0.739068	5.55556
2004-12-17	352	7.6	0.586158	7.77778
2004-12-18	353	7.5	0.495544	6.66667
2004-12-19	354	7.1	0.450237	6.11111
2004-12-20	355	6.5	0.402099	5
2004-12-21	356	6.1	0.42192	2.77778
2004-12-22	357	6.6	0.557841	7.22222
2004-12-23	358	6.4	0.379445	4.44444
2004-12-24	359	6.2	0.334138	2.77778
2004-12-25	360	6.2	0.506871	5.55556
2004-12-26	361	6.8	2.57966	5
2004-12-27	362	6.5	0.713583	6.66667
2004-12-28	363	6.2	0.504039	4.44444
2004-12-29	364	6.4	0.549346	3.88889
2004-12-30	365	6.3	0.574831	5
2004-12-31	366	5.9	2.14075	2.77778
2005-01-01	1	5.9	2.94495	3.88889
2005-01-02	2	5.6	0.914633	3.88889
2005-01-03	3	4.5	0.620138	1.66667
2005-01-04	4	3.3	0.509702	2.77778
2005-01-05	5	2.6	0.427584	1.11111
2005-01-06	6	3.3	0.393604	3.88889
2005-01-07	7	4.9	1.33938	3.88889
2005-01-08	8	4.9	1.41301	5
2005-01-09	9	5	0.688098	3.33333
2005-01-10	10	4.45	0.761722	2.77778
2005-01-11	11	3.9	0.523861	0.555556
2005-01-12	12	4.4	0.43891	6.11111
2005-01-13	13	5.2	0.433247	3.33333
2005-01-14	14	4.3	0.359623	1.11111
2005-01-15	15	2.8	0.481386	-1.11111
2005-01-16	16	3.1	0.631465	-0.555556
2005-01-17	17	4.5	1.60273	7.22222
2005-01-18	18	8.5	3.31307	13.8889
2005-01-19	19	9.5	1.14683	10.5556
2005-01-20	20	9.5	0.860831	9.44444
2005-01-21	21	9.5	0.730573	10
2005-01-22	22	9.3	0.586158	10
2005-01-23	23	9.1	0.509702	8.33333
2005-01-24	24	8.5	0.461564	6.66667
2005-01-25	25	8.3	0.433247	5.55556
2005-01-26	26	8	0.410594	7.77778
2005-01-27	27	8.3	0.38794	7.77778
2005-01-28	28	8.5	0.750395	8.88889
2005-01-29	29	8.4	3.1998	7.77778
2005-01-30	30	8.4	1.03073	8.88889
2005-01-31	31	8.2	0.671108	7.22222
2005-02-01	32	8	0.600316	5.55556
2005-02-02	33	7.6	0.470059	5.55556
2005-02-03	34	7.1	0.444574	4.44444
2005-02-04	35	7.1	0.498376	7.22222
2005-02-05	36	6.7	0.4559	5
2005-02-06	37	6.7	1.09869	4.44444
2005-02-07	38	6.8	1.18081	3.88889
2005-02-08	39	6	0.560673	3.88889
2005-02-09	40	5.8	0.470059	5
2005-02-10	41	5.4	0.416257	6.11111
2005-02-11	42	5.4	0.396435	7.77778
2005-02-12	43	5.9	0.529524	6.11111
2005-02-13	44	6.7	0.549346	5
2005-02-14	45	5.9	0.40493	3.33333
2005-02-15	46	5	0.362455	3.88889
2005-02-16	47	5	0.33697	7.22222
2005-02-17	48	4.9	0.311485	5.55556
2005-02-18	49	5.4	0.300158	6.66667
2005-02-19	50	5.7	0.297326	6.66667
2005-02-20	51	6.7	0.291663	7.77778
2005-02-21	52	6.7	0.276655	7.22222
2005-02-22	53	6.8	0.278637	8.33333
2005-02-23	54	7.1	0.243808	8.33333
2005-02-24	55	7.2	0.237295	9.44444
2005-02-25	56	7.5	0.230499	7.22222
2005-02-26	57	7.9	0.237861	8.88889
2005-02-27	58	8.2	0.252869	10.5556
2005-02-28	59	9.3	0.311485	11.6667
2005-03-01	60	9.9	0.532356	11.6667
2005-03-02	61	10.2	0.322812	8.88889
2005-03-03	62	9.9	0.261364	9.44444
2005-03-04	63	9.8	0.240693	11.1111
2005-03-05	64	9.8	0.230216	10
2005-03-06	65	9.9	0.220588	10.5556
2005-03-07	66	10.9	0.229083	14.4444
2005-03-08	67	11.5	0.220871	13.3333
2005-03-09	68	11.8	0.215491	13.8889
2005-03-10	69	12	0.206996	14.4444
2005-03-11	70	12.2	0.209827	15
2005-03-12	71	12.4	0.20473	12.7778
2005-03-13	72	11.6	0.190855	11.1111
2005-03-14	73	10.8	0.183776	10.5556
2005-03-15	74	10.3	0.185192	10
2005-03-16	75	10	0.202182	7.77778
2005-03-17	76	9.2	0.317148	7.22222
2005-03-18	77	9.2	0.233614	6.66667
2005-03-19	78	9.9	1.3762	10.5556
2005-03-20	79	10.2	1.12984	9.44444
2005-03-21	80	9.2	0.668276	7.22222
2005-03-22	81	8.7	0.342633	6.66667
2005-03-23	82	8.9	0.495544	7.22222
2005-03-24	83	8.9	0.611643	7.77778
2005-03-25	84	9.2	0.546514	8.88889
2005-03-26	85	9.8	2.40693	10
2005-03-27	86	10.4	14.6398	8.88889
2005-03-28	87	10	6.20138	8.33333
2005-03-29	88	9.6	5.06871	9.44444
2005-03-30	89	10	1.98784	8.88889
2005-03-31	90	10.8	1.34505	10.5556
2005-04-01	91	11.6	1.716	11.6667
2005-04-02	92	11.5	1.13267	10.5556
2005-04-03	93	11.2	1.13267	8.88889
2005-04-04	94	10.8	0.866494	8.88889
2005-04-05	95	11.3	0.642791	12.2222
2005-04-06	96	12	0.563504	13.8889
2005-04-07	97	12.2	1.49513	8.88889
2005-04-08	98	11.6	0.957108	9.44444
2005-04-09	99	11.3	0.577663	8.33333
2005-04-10	100	10.9	0.702257	9.44444
2005-04-11	101	11.1	2.7439	8.33333
2005-04-12	102	10.6	1.23461	7.22222
2005-04-13	103	10.1	1.17515	8.88889
2005-04-14	104	10.7	0.736237	8.88889
2005-04-15	105	10.6	0.719247	8.33333
2005-04-16	106	11.4	3.22812	11.1111
2005-04-17	107	11.1	1.5999	8.88889
2005-04-18	108	10.7	2.30499	11.1111
2005-04-19	109	11.2	1.10719	11.1111
2005-04-20	110	12.7	0.843841	12.7778
2005-04-21	111	14	0.710752	14.4444
2005-04-22	112	15.3	0.571999	16.6667
2005-04-23	113	14.6	0.795702	11.6667
2005-04-24	114	13.4	0.914633	11.6667
2005-04-25	115	12.8	1.9397	11.6667
2005-04-26	116	13.3	0.931623	15
2005-04-27	117	14.7	0.747564	16.6667
2005-04-28	118	15.8	2.12942	15.5556
2005-04-29	119	15.1	0.682435	13.3333
2005-04-30	120	14.3	0.563504	15.5556
2005-05-01	121	14.8	0.489881	14.4444
2005-05-02	122	15.5	0.70792	14.4444
2005-05-03	123	15.6	0.506871	16.1111
2005-05-04	124	16.05	1.35354	17.2222
2005-05-05	125	16.5	0.608811	15.5556
2005-05-06	126	16	0.472891	15
2005-05-07	127	15.6	0.393604	15
2005-05-08	128	15.2	0.583326	15.5556
2005-05-09	129	14.1	3.39802	11.6667
2005-05-10	130	12.3	6.71108	12.7778
2005-05-11	131	13.1	2.26534	12.7778
2005-05-12	132	14	1.22612	16.6667
2005-05-13	133	15.3	0.920296	16.6667
2005-05-14	134	16.3	1.94253	18.8889
2005-05-15	135	16.7	1.36487	16.1111
2005-05-16	136	15.4	2.45223	13.8889
2005-05-17	137	14.1	2.06146	12.2222
2005-05-18	138	14.3	4.47405	16.1111
2005-05-19	139	14.4	2.76938	14.4444
2005-05-20	140	14.4	2.61364	12.2222
2005-05-21	141	13.5	1.9482	12.2222
2005-05-22	142	13.1	1.92271	13.3333
2005-05-23	143	13.7	1.24311	12.7778
2005-05-24	144	14.4	0.863662	15.5556
2005-05-25	145	15.8	0.671108	19.4444
2005-05-26	146	17.5	0.557841	22.7778
2005-05-27	147	19	0.509702	25
2005-05-28	148	19.2	0.433247	19.4444
2005-05-29	149	17.5	0.399267	15.5556
2005-05-30	150	17.2	0.393604	18.8889
2005-05-31	151	16.9	0.365287	15
2005-06-01	152	16.2	0.467227	15
2005-06-02	153	15.8	0.538019	15
2005-06-03	154	15.5	0.356792	15.5556
2005-06-04	155	15.2	0.317148	14.4444
2005-06-05	156	14.6	0.571999	12.7778
2005-06-06	157	14	0.487049	12.7778
2005-06-07	158	14.6	0.659781	13.3333
2005-06-08	159	15.5	0.376613	16.6667
2005-06-09	160	16.4	0.305821	17.7778
2005-06-10	161	16.4	0.396435	15
2005-06-11	162	16.1	0.69093	13.8889
2005-06-12	163	15.8	0.402099	15.5556
2005-06-13	164	16.1	0.278637	17.7778
2005-06-14	165	16.1	0.249188	15.5556
2005-06-15	166	16.1	0.256267	15
2005-06-16	167	16.2	0.25202	17.2222
2005-06-17	168	15.8	1.30824	16.1111
2005-06-18	169	16.7	0.999583	17.2222
2005-06-19	170	16.3	1.46115	19.4444
2005-06-20	171	18.1	0.390772	20.5556
2005-06-21	172	18.8	0.314316	19.4444
2005-06-22	173	18.3	0.348297	17.7778
2005-06-23	174	18	0.538019	18.3333
2005-06-24	175	18	0.259382	19.4444
2005-06-25	176	18.5	0.217756	19.4444
2005-06-26	177	18	0.212942	17.7778
2005-06-27	178	16.9	1.51212	15.5556
2005-06-28	179	16.8	1.43283	17.2222
2005-06-29	180	17.95	0.416257	20.5556
2005-06-30	181	19.1	0.308653	21.6667
2005-07-01	182	19.6	0.268726	19.4444
2005-07-02	183	18.7	0.229366	17.7778
2005-07-03	184	18.3	0.224269	19.4444
2005-07-04	185	19.2	0.200766	21.6667
2005-07-05	186	20	0.167919	21.6667
2005-07-06	187	20.5	0.184059	20
2005-07-07	188	19.6	0.175281	19.4444
2005-07-08	189	18.3	0.458732	16.6667
2005-07-09	190	18.1	0.69093	17.7778
2005-07-10	191	18	0.265895	18.3333
2005-07-11	192	18.6	0.224835	21.6667
2005-07-12	193	18.9	0.178679	20
2005-07-13	194	18.5	0.15461	19.4444
2005-07-14	195	18.9	0.155742	21.6667
2005-07-15	196	20	0.134222	22.7778
2005-07-16	197	20.2	0.12063	21.1111
2005-07-17	198	20.3	0.11978	24.4444
2005-07-18	199	21.4	0.118081	25
2005-07-19	200	21	0.105055	21.1111
2005-07-20	201	20.5	0.0931623	21.1111
2005-07-21	202	20.7	0.100241	23.8889
2005-07-22	203	21	0.173016	21.1111
2005-07-23	204	20.4	0.153477	20.5556
2005-07-24	205	20	0.121196	20
2005-07-25	206	19.9	0.104489	21.1111
2005-07-26	207	20.5	0.102224	25
2005-07-27	208	21	0.0974098	25.5556
2005-07-28	209	21.6	0.0985425	23.8889
2005-07-29	210	21.2	0.108453	22.7778
2005-07-30	211	21.3	0.137053	24.4444
2005-07-31	212	21.6	0.130824	24.4444
2005-08-01	213	21.1	0.133089	20.8333
2005-08-02	214	19.7	0.150929	20.2778
2005-08-03	215	19.8	0.212376	23.6111
2005-08-04	216	20.4	0.311485	25.2778
2005-08-05	217	21.1	0.311485	24.7222
2005-08-06	218	21.2	0.154893	21.9444
2005-08-07	219	20.8	0.156309	21.9444
2005-08-08	220	20.8	0.210111	22.2222
2005-08-09	221	20.5	0.197085	20.8333
2005-08-10	222	19.8	0.174998	20
2005-08-11	223	19.2	0.179529	18.3333
2005-08-12	224	19.4	0.173299	21.1111
2005-08-13	225	19.6	0.18236	25
2005-08-14	226	20.5	0.198218	25.8333
2005-08-15	227	20.9	0.0906138	24.1667
2005-08-16	228	20.3	0.0962771	19.7222
2005-08-17	229	19.5	0.120063	19.4444
2005-08-18	230	19.3	0.109869	22.2222
2005-08-19	231	19.8	0.126293	23.3333
2005-08-20	232	20	0.109303	22.5
2005-08-21	233	20.2	0.0982593	21.1111
2005-08-22	234	19.6	0.10279	20.2778
2005-08-23	235	18.3	0.0940118	16.9444
2005-08-24	236	17.7	0.0991088	19.7222
2005-08-25	237	18.2	0.107604	23.0556
2005-08-26	238	18.9	0.0965603	22.5
2005-08-27	239	18.8	0.0925959	21.6667
2005-08-28	240	19	0.0903306	21.6667
2005-08-29	241	18.8	0.199633	17.5
2005-08-30	242	18.1	0.214925	18.6111
2005-08-31	243	18	0.137336	20.2778
2005-09-01	244	18.3	0.108737	21.6667
2005-09-02	245	18.4	0.105905	19.1667
2005-09-03	246	18.1	0.0999583	19.1667
2005-09-04	247	17.8	0.0985425	18.3333
2005-09-05	248	17	0.105055	18.0556
2005-09-06	249	16.9	0.099392	20
2005-09-07	250	17.3	0.0942949	21.3889
2005-09-08	251	17.4	0.0897643	21.6667
2005-09-09	252	16.7	0.0874989	17.5
2005-09-10	253	16	0.0979761	15.2778
2005-09-11	254	15.4	0.0974098	15.5556
2005-09-12	255	15.7	0.102507	17.5
2005-09-13	256	16	0.0971266	17.7778
2005-09-14	257	15.9	0.0906138	16.9444
2005-09-15	258	16.3	0.0988256	16.3889
2005-09-16	259	15.4	0.125727	13.8889
2005-09-17	260	15.2	0.167352	14.4444
2005-09-18	261	14.7	0.130257	15.5556
2005-09-19	262	14.6	0.113267	16.3889
2005-09-20	263	14.9	0.0979761	16.6667
2005-09-21	264	14.2	0.0866494	15.8333
2005-09-22	265	13.9	0.0846672	13.0556
2005-09-23	266	13.7	0.0815524	14.7222
2005-09-24	267	12.9	0.0801365	13.3333
2005-09-25	268	12.7	0.077588	14.7222
2005-09-26	269	13	0.0841009	16.6667
2005-09-27	270	13.6	0.0807029	16.9444
2005-09-28	271	13.6	0.0937286	16.1111
2005-09-29	272	14	0.100241	16.6667
2005-09-30	273	16	3.62455	16.3889
2005-10-01	274	15.9	4.70059	13.0556
2005-10-02	275	14.4	0.764554	11.1111
2005-10-03	276	13	0.662613	11.1111
2005-10-04	277	12.7	0.495544	12.7778
2005-10-05	278	13.1	0.308653	15.5556
2005-10-06	279	13.65	0.259099	14.1667
2005-10-07	280	14.2	0.464396	13.6111
2005-10-08	281	13.7	0.569168	12.2222
2005-10-09	282	13.8	0.988256	14.4444
2005-10-10	283	13.3	0.305821	13.0556
2005-10-11	284	13.6	0.232481	14.1667
2005-10-12	285	12.8	0.193404	11.1111
2005-10-13	286	13	0.192837	13.0556
2005-10-14	287	13.4	0.215491	15.2778
2005-10-15	288	13.8	0.450237	15.2778
2005-10-16	289	14.3	0.767385	15
2005-10-17	290	14.7	0.265045	16.6667
2005-10-18	291	14.8	0.165936	15.8333
2005-10-19	292	14.8	0.501207	15.2778
2005-10-20	293	14.3	0.291663	13.3333
2005-10-21	294	13.8	0.242958	16.3889
2005-10-22	295	13.3	0.168768	16.1111
2005-10-23	296	13.2	0.141867	13.8889
2005-10-24	297	13.8	0.136487	16.3889
2005-10-25	298	14.3	0.396435	14.7222
2005-10-26	299	13.7	0.923128	10.5556
2005-10-27	300	12.1	0.314316	8.88889
2005-10-28	301	11.9	1.62822	11.3889
2005-10-29	302	11.8	0.79287	10.2778
2005-10-30	303	11.3	0.538019	10.8333
2005-10-31	304	12	3.68118	12.5
2005-11-01	305	11.7	12.4594	10
2005-11-02	306	11.4	5.04039	9.72222
2005-11-03	307	11.1	3.51128	9.16667
2005-11-04	308	10.4	4.36079	8.61111
2005-11-05	309	9.8	5.09702	10
2005-11-06	310	10	3.51128	9.44444
2005-11-07	311	10	1.86891	5.83333
2005-11-08	312	8.8	1.05622	5.83333
2005-11-09	313	8	0.69093	6.94444
2005-11-10	314	8.3	0.69093	9.72222
2005-11-11	315	9.1	1.16948	7.77778
2005-11-12	316	8.8	3.7095	7.5
2005-11-13	317	9.8	3.34138	11.3889
2005-11-14	318	10.4	1.15533	7.5
2005-11-15	319	8.9	0.727742	5.55556
2005-11-16	320	7.9	0.574831	6.38889
2005-11-17	321	8.1	0.475722	9.44444
2005-11-18	322	7.7	0.424752	6.66667
2005-11-19	323	7.2	0.37095	6.38889
2005-11-20	324	6.9	0.331307	4.72222
2005-11-21	325	6.5	0.30299	5
2005-11-22	326	6.3	0.276938	5.27778
2005-11-23	327	5.9	0.267877	4.44444
2005-11-24	328	5.6	0.484217	3.33333
2005-11-25	329	6.5	4.89881	5.83333
2005-11-26	330	7	2.11526	5.27778
2005-11-27	331	6.9	0.95994	2.77778
2005-11-28	332	5.9	0.846672	2.5
2005-11-29	333	6	2.44374	3.33333
2005-11-30	334	5.9	1.44699	4.44444
2005-12-01	335	6.1	2.15774	4.44444
2005-12-02	336	5.9	8.41009	4.72222
2005-12-03	337	6.4	5.29524	4.72222
2005-12-04	338	6.7	1.81794	3.61111
2005-12-05	339	6.7	1.16948	3.88889
2005-12-06	340	6.5	0.900474	4.72222
2005-12-07	341	5.6	0.730573	3.05556
2005-12-08	342	3.9	0.603148	2.22222
2005-12-09	343	3.3	0.512534	1.38889
2005-12-10	344	3.1	0.470059	0.833333
2005-12-11	345	3	0.416257	1.66667
2005-12-12	346	3	0.385108	-0.277778
2005-12-13	347	3.1	0.359623	1.94444
2005-12-14	348	2.8	0.33697	0
2005-12-15	349	2	0.311485	-1.66667
2005-12-16	350	1.3	0.294495	-1.11111
2005-12-17	351	0.7	0.283168	0.555556
2005-12-18	352	0.2	0.265328	0
2005-12-19	353	1.3	1.55742	2.22222
2005-12-20	354	3.2	3.39802	3.88889
2005-12-21	355	5.5	5.91821	4.72222
2005-12-22	356	8	12.1196	8.61111
2005-12-23	357	8.2	6.85267	9.16667
2005-12-24	358	8.6	2.43524	8.88889
2005-12-25	359	9.4	2.01616	12.2222
2005-12-26	360	9.4	3.56792	10
2005-12-27	361	8.8	7.0792	9.16667
2005-12-28	362	8.8	19.2554	9.72222
2005-12-29	363	8.35	8.57999	6.94444
2005-12-30	364	7.9	22.2853	5.27778
2005-12-31	365	8.8	14.5548	8.05556
2006-01-01	1	8.9	4.67227	9.16667
2006-01-02	2	8.5	5.55009	6.66667
2006-01-03	3	7.9	4.10594	6.11111
2006-01-04	4	7.7	3.1998	6.38889
2006-01-05	5	8.2	2.2795	8.05556
2006-01-06	6	8.7	9.17464	7.22222
2006-01-07	7	9	10.279	8.05556
2006-01-08	8	8.4	5.26692	7.22222
2006-01-09	9	8.8	5.55009	9.44444
2006-01-10	10	9.9	17.1883	11.9444
2006-01-11	11	9.2	17.075	8.88889
2006-01-12	12	8.7	7.419	6.66667
2006-01-13	13	9	8.52336	8.05556
2006-01-14	14	9.1	5.52178	5.27778
2006-01-15	15	8.2	3.3697	5
2006-01-16	16	7.8	5.21029	7.5
2006-01-17	17	8.9	12.9691	8.33333
2006-01-18	18	8.7	6.82435	7.5
2006-01-19	19	8.8	3.68118	7.5
2006-01-20	20	8.3	6.9093	7.5
2006-01-21	21	8.2	3.82277	6.94444
2006-01-22	22	8.3	2.63913	6.38889
2006-01-23	23	8.3	1.95103	6.66667
2006-01-24	24	7.6	1.63671	7.77778
2006-01-25	25	7.3	1.97651	5.55556
2006-01-26	26	7.3	2.88831	6.11111
2006-01-27	27	7.3	3.34138	6.66667
2006-01-28	28	7.3	9.00474	8.05556
2006-01-29	29	7.8	7.81544	9.72222
2006-01-30	30	9.1	18.7457	9.16667
2006-01-31	31	8	9.25959	6.66667
2006-02-01	32	7.6	10.7887	10.2778
2006-02-02	33	8.8	8.41009	9.44444
2006-02-03	34	9	4.81386	8.88889
2006-02-04	35	8.9	8.24019	7.77778
2006-02-05	36	8	4.02099	5.83333
2006-02-06	37	7.7	2.7977	7.22222
2006-02-07	38	7.4	2.14641	6.66667
2006-02-08	39	8.1	1.73865	7.22222
2006-02-09	40	7.7	1.44416	6.94444
2006-02-10	41	6.9	1.24594	9.44444
2006-02-11	42	6.5	1.0194	7.5
2006-02-12	43	7.3	0.920296	8.61111
2006-02-13	44	7.8	0.883484	6.66667
2006-02-14	45	7.1	0.869326	4.16667
2006-02-15	46	5.8	0.818356	2.22222
2006-02-16	47	4.7	0.713583	1.66667
2006-02-17	48	3.6	0.642791	-0.555556
2006-02-18	49	1.7	0.566336	0.833333
2006-02-19	50	1.8	0.557841	1.66667
2006-02-20	51	2.2	0.529524	-1.11111
2006-02-21	52	4	0.529524	4.72222
2006-02-22	53	5.8	0.523861	7.5
2006-02-23	54	6.6	0.540851	6.38889
2006-02-24	55	6.2	0.625801	2.5
2006-02-25	56	5.6	0.484217	3.88889
2006-02-26	57	6	0.487049	5.83333
2006-02-27	58	7.2	1.23744	6.11111
2006-02-28	59	7.7	4.50237	7.22222
2006-03-01	60	8.2	1.61972	9.44444
2006-03-02	61	8.6	0.968435	6.66667
2006-03-03	62	7.5	0.784375	6.66667
2006-03-04	63	8.1	0.668276	8.33333
2006-03-05	64	8.4	1.27992	9.16667
2006-03-06	65	8.8	0.739068	9.44444
2006-03-07	66	9	1.02507	7.77778
2006-03-08	67	8.2	2.67027	5
2006-03-09	68	5.7	5.74831	2.77778
2006-03-10	69	6.05	4.75722	3.05556
2006-03-11	70	6.4	2.31065	3.05556
2006-03-12	71	7.1	1.65087	5.83333
2006-03-13	72	7.1	1.27142	5
2006-03-14	73	7.6	1.18647	6.38889
2006-03-15	74	7.8	1.09869	6.94444
2006-03-16	75	7.9	3.11485	7.5
2006-03-17	76	8.2	1.92271	8.33333
2006-03-18	77	8.6	1.1978	6.94444
2006-03-19	78	8.4	0.965603	6.38889
2006-03-20	79	8.6	0.880652	7.77778
2006-03-21	80	9.2	1.04206	8.88889
2006-03-22	81	9.6	1.03073	10.8333
2006-03-23	82	10	0.778712	11.9444
2006-03-24	83	10.3	1.96519	9.16667
2006-03-25	84	9.7	2.03598	6.94444
2006-03-26	85	9.1	1.41867	7.77778
2006-03-27	86	9.8	0.897643	10.5556
2006-03-28	87	10	0.798534	13.3333
2006-03-29	88	10.2	0.72491	9.16667
2006-03-30	89	10.5	0.857999	10
2006-03-31	90	11	1.32806	11.3889
2006-04-01	91	10.8	2.7892	10
2006-04-02	92	10.8	1.23178	11.1111
2006-04-03	93	11.1	1.14117	11.1111
2006-04-04	94	11.3	0.826851	10.2778
2006-04-05	95	12.5	1.0902	12.5
2006-04-06	96	12.1	0.761722	10.8333
2006-04-07	97	12.1	0.60598	13.6111
2006-04-08	98	12.2	1.78962	11.9444
2006-04-09	99	12.2	1.12984	11.6667
2006-04-10	100	11.6	3.8794	11.9444
2006-04-11	101	12.3	1.42434	11.9444
2006-04-12	102	13.4	1.08737	13.3333
2006-04-13	103	13.3	0.855167	11.3889
2006-04-14	104	11.9	1.65087	8.61111
2006-04-15	105	10.1	3.05821	6.38889
2006-04-16	106	9.5	2.38144	7.5
2006-04-17	107	10.2	1.64804	8.05556
2006-04-18	108	10.7	1.26576	10
2006-04-19	109	12.1	0.965603	13.0556
2006-04-20	110	13.4	0.857999	13.8889
2006-04-21	111	13.05	0.815524	11.1111
2006-04-22	112	12.7	0.696593	11.1111
2006-04-23	113	13.1	0.625801	14.1667
2006-04-24	114	13.9	0.569168	13.6111
2006-04-25	115	14.1	0.526692	14.7222
2006-04-26	116	13.6	0.464396	12.2222
2006-04-27	117	14	0.472891	15.5556
2006-04-28	118	15.5	0.453069	18.6111
2006-04-29	119	15.4	0.682435	11.6667
2006-04-30	120	13.5	0.900474	9.72222
2006-05-01	121	13.2	0.4559	10.5556
2006-05-02	122	12.9	0.40493	11.1111
2006-05-03	123	13.4	0.38794	15
2006-05-04	124	14.5	0.356792	16.6667
2006-05-05	125	15.1	0.33697	16.1111
2006-05-06	126	14.5	0.351128	12.2222
2006-05-07	127	13.1	0.620138	10.2778
2006-05-08	128	12.7	0.903306	10
2006-05-09	129	12.3	0.427584	12.5
2006-05-10	130	13.7	0.368118	16.1111
2006-05-11	131	15.1	0.339802	13.8889
2006-05-12	132	14.7	0.31998	12.2222
2006-05-13	133	14.4	0.305821	14.4444
2006-05-14	134	15.1	0.288831	18.3333
2006-05-15	135	17	0.280053	23.6111
2006-05-16	136	18.7	0.265895	22.7778
2006-05-17	137	19.3	0.254002	21.9444
2006-05-18	138	19.6	0.254002	21.1111
2006-05-19	139	18.6	0.331307	16.3889
2006-05-20	140	18.1	0.424752	18.6111
2006-05-21	141	17.9	1.05622	17.7778
2006-05-22	142	17.1	3.25643	16.3889
2006-05-23	143	16	2.59665	15.2778
2006-05-24	144	15.8	1.90572	14.4444
2006-05-25	145	15.6	1.09586	13.6111
2006-05-26	146	14.4	1.35637	12.5
2006-05-27	147	13.7	2.19455	11.1111
2006-05-28	148	13.7	1.68768	13.0556
2006-05-29	149	14.6	0.688098	15.2778
2006-05-30	150	15.5	0.487049	16.6667
2006-05-31	151	16.3	0.458732	18.0556
2006-06-01	152	17	1.56309	18.0556
2006-06-02	153	17.4	1.74431	18.8889
2006-06-03	154	17.5	0.625801	17.7778
2006-06-04	155	17.6	1.16099	19.7222
2006-06-05	156	18.5	0.591821	19.4444
2006-06-06	157	18.1	0.427584	17.7778
2006-06-07	158	17.35	0.37095	16.9444
2006-06-08	159	16.6	0.325643	15.2778
2006-06-09	160	15.5	0.305821	14.7222
2006-06-10	161	15.7	0.297326	17.5
2006-06-11	162	16.8	0.286	20.2778
2006-06-12	163	17.3	0.331307	18.8889
2006-06-13	164	17.2	0.35396	17.7778
2006-06-14	165	16.6	0.253435	16.3889
2006-06-15	166	16.4	0.24494	17.2222
2006-06-16	167	17.1	0.286	18.0556
2006-06-17	168	17.5	0.342633	17.2222
2006-06-18	169	16.9	0.218889	16.3889
2006-06-19	170	16.2	0.20473	16.6667
2006-06-20	171	16	0.186608	16.1111
2006-06-21	172	16.6	0.180095	16.9444
2006-06-22	173	17.1	0.165653	18.3333
2006-06-23	174	17.6	0.154893	19.1667
2006-06-24	175	18.6	0.156592	23.3333
2006-06-25	176	20.2	0.139319	27.5
2006-06-26	177	21.7	0.135637	28.3333
2006-06-27	178	22.5	0.127992	22.5
2006-06-28	179	21.1	0.136487	20
2006-06-29	180	19.8	0.113267	20.5556
2006-06-30	181	20.3	0.113834	23.8889
2006-07-01	182	20.7	0.1144	22.7778
2006-07-02	183	21	0.122329	22.7778
2006-07-03	184	21.3	0.115816	20.8333
2006-07-04	185	21	0.120346	19.4444
2006-07-05	186	19.1	0.115249	15.8333
2006-07-06	187	18.5	0.129125	17.5
2006-07-07	188	17.9	0.158008	19.7222
2006-07-08	189	19.1	0.127426	23.8889
2006-07-09	190	20.6	0.109586	24.7222
2006-07-10	191	20.5	0.111285	18.6111
2006-07-11	192	19.5	0.102507	19.4444
2006-07-12	193	18.7	0.180944	18.0556
2006-07-13	194	19	0.260515	21.3889
2006-07-14	195	19.8	0.153477	21.1111
2006-07-15	196	20.6	0.127142	21.3889
2006-07-16	197	20.3	0.122612	21.3889
2006-07-17	198	19.9	0.122329	18.6111
2006-07-18	199	19.1	0.128841	18.8889
2006-07-19	200	19.4	0.132239	21.3889
2006-07-20	201	20.2	0.141867	24.7222
2006-07-21	202	21.4	0.146964	29.1667
2006-07-22	203	22.5	0.144416	28.6111
2006-07-23	204	23	0.162255	29.4444
2006-07-24	205	24	0.138186	28.0556
2006-07-25	206	23	0.0790039	23.0556
2006-07-26	207	22.2	0.0637128	24.4444
2006-07-27	208	22.1	0.0611643	21.6667
2006-07-28	209	20.5	0.0586158	18.3333
2006-07-29	210	19.4	0.0614475	18.8889
2006-07-30	211	18.5	0.0631465	18.3333
2006-07-31	212	17.9	0.067394	18.6111
2006-08-01	213	18	0.0713583	19.1667
2006-08-02	214	18.1	0.0841009	20
2006-08-03	215	18.4	0.0855167	20
2006-08-04	216	18.4	0.0908969	20
2006-08-05	217	18.9	0.080986	22.2222
2006-08-06	218	19.8	0.080986	24.1667
2006-08-07	219	20.5	0.0826851	23.6111
2006-08-08	220	20.3	0.0877821	20.5556
2006-08-09	221	20.4	0.080986	21.1111
2006-08-10	222	19.8	0.0676772	20.2778
2006-08-11	223	18.8	0.0733405	18.6111
2006-08-12	224	18	0.0778712	19.7222
2006-08-13	225	18.6	0.0872157	23.0556
2006-08-14	226	19.4	0.0925959	23.0556
2006-08-15	227	18.8	0.0849504	17.7778
2006-08-16	228	17.9	0.0815524	17.2222
2006-08-17	229	17.8	0.0781544	19.4444
2006-08-18	230	18.4	0.0855167	23.3333
2006-08-19	231	19.2	0.0897643	25
2006-08-20	232	19.7	0.0790039	23.6111
2006-08-21	233	19.5	0.075889	20
2006-08-22	234	18.6	0.0750395	18.6111
2006-08-23	235	17.9	0.0852336	18.0556
2006-08-24	236	17.6	0.0940118	17.5
2006-08-25	237	17.3	0.0974098	20.5556
2006-08-26	238	18.3	0.10194	24.1667
2006-08-27	239	19	0.0928791	24.7222
2006-08-28	240	19.4	0.0965603	23.8889
2006-08-29	241	18.5	0.0790039	16.6667
2006-08-30	242	17.1	0.0906138	16.3889
2006-08-31	243	16.3	0.106188	18.0556
2006-09-01	244	17.2	0.0957108	22.2222
2006-09-02	245	18	0.0668276	24.7222
2006-09-03	246	18.4	0.065695	22.2222
2006-09-04	247	18.6	0.0645623	21.3889
2006-09-05	248	18.5	0.062297	20.8333
2006-09-06	249	18.4	0.0594653	21.6667
2006-09-07	250	17.8	0.0614475	19.4444
2006-09-08	251	17.3	0.0625801	18.3333
2006-09-09	252	17.5	0.0586158	18.6111
2006-09-10	253	16.6	0.0574831	18.3333
2006-09-11	254	16.4	0.060598	20.2778
2006-09-12	255	16.8	0.0600316	21.1111
2006-09-13	256	16.4	0.0509702	15.2778
2006-09-14	257	15.6	0.0838177	13.3333
2006-09-15	258	15.1	0.597484	13.6111
2006-09-16	259	14.6	0.130257	14.1667
2006-09-17	260	14.7	0.080986	17.5
2006-09-18	261	15.7	0.396435	18.6111
2006-09-19	262	15.9	0.444574	15.5556
2006-09-20	263	15.1	0.270709	12.7778
2006-09-21	264	15	0.317148	13.8889
2006-09-22	265	14.3	0.136487	14.4444
2006-09-23	266	14.1	0.0880652	18.0556
2006-09-24	267	14.8	0.0744732	19.4444
2006-09-25	268	15.3	0.0642791	19.7222
2006-09-26	269	15.5	0.0914633	19.7222
2006-09-27	270	15.6	0.0784375	20.5556
2006-09-28	271	15.6	0.0730573	20
2006-09-29	272	15.8	0.0801365	20
2006-09-30	273	15.5	0.0843841	15.8333
2006-10-01	274	14.7	0.0829682	14.4444
2006-10-02	275	14.2	0.0948613	15
2006-10-03	276	14	0.105622	14.4444
2006-10-04	277	13.6	0.103923	15
2006-10-05	278	13.6	0.100241	15.2778
2006-10-06	279	13.7	0.101374	13.0556
2006-10-07	280	13.3	0.0948613	13.6111
2006-10-08	281	12.6	0.136204	10.8333
2006-10-09	282	12.7	0.151495	15.2778
2006-10-10	283	11.9	0.124311	14.1667
2006-10-11	284	11.7	0.0971266	15
2006-10-12	285	11.5	0.0917464	15.8333
2006-10-13	286	11.5	0.0942949	13.3333
2006-10-14	287	11.5	0.0968435	12.2222
2006-10-15	288	11.8	0.798534	12.5
2006-10-16	289	12.3	1.57725	12.7778
2006-10-17	290	12.6	0.518197	13.3333
2006-10-18	291	12.3	0.196235	11.9444
2006-10-19	292	12.8	0.682435	13.3333
2006-10-20	293	12.7	0.342633	12.5
2006-10-21	294	11.6	0.164804	13.3333
2006-10-22	295	11.5	0.11355	15
2006-10-23	296	11.1	0.0962771	10
2006-10-24	297	10.4	0.221154	8.88889
2006-10-25	298	10.1	0.264479	9.72222
2006-10-26	299	9.4	0.167069	8.88889
2006-10-27	300	9.1	0.13762	11.1111
2006-10-28	301	9	0.135071	10.2778
2006-10-29	302	9.1	0.140451	7.22222
2006-10-30	303	8	0.113267	5.55556
2006-10-31	304	7.1	0.097693	5.27778
2006-11-01	305	6.2	0.0804197	8.88889
2006-11-02	306	7.3	2.61364	6.66667
2006-11-03	307	9.7	4.02099	11.1111
2006-11-04	308	11.8	3.31307	14.7222
2006-11-05	309	12.9	4.98376	13.8889
2006-11-06	310	14.8	10.5905	18.6111
2006-11-07	311	15.4	22.0588	13.3333
2006-11-08	312	13.2	6.20138	10.2778
2006-11-09	313	11.5	3.31307	9.72222
2006-11-10	314	10.6	4.0493	8.88889
2006-11-11	315	9.9	6.5695	8.88889
2006-11-12	316	9.8	3.08653	9.16667
2006-11-13	317	9.4	5.71999	9.44444
2006-11-14	318	9.8	2.00766	8.33333
2006-11-15	319	10.2	2.16624	11.6667
2006-11-16	320	10.2	3.28475	9.16667
2006-11-17	321	9.5	1.12418	6.38889
2006-11-18	322	9.1	0.812692	6.94444
2006-11-19	323	9.4	2.35029	8.88889
2006-11-20	324	10.1	1.92554	10.8333
2006-11-21	325	9.5	2.67311	10
2006-11-22	326	8.9	7.5889	7.5
2006-11-23	327	8.5	7.33405	6.66667
2006-11-24	328	8.7	7.7588	6.94444
2006-11-25	329	8.8	2.65895	6.11111
2006-11-26	330	7.7	6.82435	6.94444
2006-11-27	331	7.6	3.34138	2.77778
2006-11-28	332	6.7	1.89723	0.833333
2006-11-29	333	5.9	1.18931	-0.555556
2006-11-30	334	6.2	2.13792	3.05556
2006-12-01	335	7.1	1.18931	5.27778
2006-12-02	336	6.8	0.923128	3.88889
2006-12-03	337	5.6	0.804197	2.5
2006-12-04	338	5.2	0.733405	2.5
2006-12-05	339	6	0.659781	5.55556
2006-12-06	340	5.7	0.574831	4.16667
2006-12-07	341	5.7	0.518197	4.44444
2006-12-08	342	5.9	0.481386	4.72222
2006-12-09	343	6.2	1.22612	5
2006-12-10	344	7	0.679603	6.94444
2006-12-11	345	8.4	4.02099	9.72222
2006-12-12	346	8.9	4.2192	9.72222
2006-12-13	347	9.4	8.18356	11.3889
2006-12-14	348	9.2	14.6115	11.1111
2006-12-15	349	8.7	14.9796	4.16667
2006-12-16	350	7.3	3.79445	1.94444
2006-12-17	351	6	2.09261	0.277778
2006-12-18	352	5.3	1.47814	0.555556
2006-12-19	353	5.1	1.19214	0.555556
2006-12-20	354	5.1	1.144	1.38889
2006-12-21	355	5.5	3.93604	3.88889
2006-12-22	356	6.7	1.91988	5.55556
2006-12-23	357	6.8	5.26692	4.44444
2006-12-24	358	7.3	3.85108	4.44444
2006-12-25	359	7.8	10.6471	5.83333
2006-12-26	360	7.7	9.99583	5.83333
2006-12-27	361	7.7	7.16415	4.44444
2006-12-28	362	6.4	2.56267	1.66667
2006-12-29	363	5.6	1.85192	2.5
2006-12-30	364	5.5	1.43	0.555556
2006-12-31	365	5.2	1.15816	2.5
2007-01-01	1	5.2	1.54893	2.5
2007-01-02	2	7.1	3.7095	9.16667
2007-01-03	3	8.8	14.0168	7.22222
2007-01-04	4	7.3	7.98534	3.61111
2007-01-05	5	6.6	3.90772	4.44444
2007-01-06	6	6.8	5.57841	6.11111
2007-01-07	7	8	3.73782	9.16667
2007-01-08	8	8.5	2.81186	6.38889
2007-01-09	9	8.9	2.2795	7.5
2007-01-10	10	7.6	2.57966	1.94444
2007-01-11	11	6	1.64237	1.66667
2007-01-12	12	4	1.24311	-2.5
2007-01-13	13	3.1	1.06754	-2.77778
2007-01-14	14	2.6	0.928791	-2.5
2007-01-15	15	2.1	0.824019	-1.94444
2007-01-16	16	2.1	0.804197	-2.22222
2007-01-17	17	3	0.826851	0.277778
2007-01-18	18	4.1	1.12701	2.22222
2007-01-19	19	4.5	1.31673	2.5
2007-01-20	20	4.8	1.38752	4.44444
2007-01-21	21	5	0.914633	3.33333
2007-01-22	22	5.8	0.807029	6.94444
2007-01-23	23	5.9	0.733405	7.22222
2007-01-24	24	5.3	0.67394	5.55556
2007-01-25	25	4.7	0.625801	1.11111
2007-01-26	26	5	0.594653	5.83333
2007-01-27	27	4.8	0.552178	3.61111
2007-01-28	28	4	0.512534	3.88889
2007-01-29	29	3.7	0.487049	2.77778
2007-01-30	30	3.7	0.475722	3.33333
2007-01-31	31	3.5	0.461564	4.16667
2007-02-01	32	3.3	0.444574	2.77778
2007-02-02	33	3.4	0.427584	2.5
2007-02-03	34	3.6	0.430415	1.11111
2007-02-04	35	5	0.467227	8.61111
2007-02-05	36	6.1	0.441742	6.66667
2007-02-06	37	6.7	0.540851	7.22222
2007-02-07	38	7	0.42192	5.83333
2007-02-08	39	7.6	0.651286	7.5
2007-02-09	40	8.1	1.34222	8.61111
2007-02-10	41	8.1	0.730573	6.38889
2007-02-11	42	8.1	1.8774	9.44444
2007-02-12	43	8.5	0.942949	9.16667
2007-02-13	44	8.5	0.668276	7.5
2007-02-14	45	8.4	0.911801	6.94444
2007-02-15	46	9.2	2.50037	11.3889
2007-02-16	47	9.7	3.08653	10.5556
2007-02-17	48	10	1.41584	11.6667
2007-02-18	49	9.6	1.10719	7.77778
2007-02-19	50	8.8	1.33372	8.61111
2007-02-20	51	8.3	5.52178	7.5
2007-02-21	52	7.7	2.52869	5.83333
2007-02-22	53	7.8	3.22812	6.11111
2007-02-23	54	7.6	1.89439	5.55556
2007-02-24	55	7.6	5.06871	6.11111
2007-02-25	56	7.6	5.88989	5.83333
2007-02-26	57	7.1	4.41742	5
2007-02-27	58	6.1	5.91821	3.61111
2007-02-28	59	6.2	4.67227	4.16667
2007-03-01	60	6.6	2.61081	4.72222
2007-03-02	61	7.3	4.78554	4.72222
2007-03-03	62	8.4	5.38019	8.05556
2007-03-04	63	9.1	2.56833	8.88889
2007-03-05	64	10	1.8859	12.2222
2007-03-06	65	10.1	1.50079	11.6667
2007-03-07	66	9.9	1.9397	10.2778
2007-03-08	67	9.7	1.33938	9.72222
2007-03-09	68	9.4	1.24594	8.61111
2007-03-10	69	10	1.22329	11.3889
2007-03-11	70	11.3	1.0194	17.7778
2007-03-12	71	12.2	1.7075	11.9444
2007-03-13	72	11	1.11285	8.05556
2007-03-14	73	10.1	0.835346	7.77778
2007-03-15	74	9.5	0.727742	6.66667
2007-03-16	75	10.3	0.67394	13.3333
2007-03-17	76	11.4	0.631465	13.0556
2007-03-18	77	12.5	0.60598	15.8333
2007-03-19	78	12.4	1.12701	12.7778
2007-03-20	79	11.3	1.73582	6.38889
2007-03-21	80	9.9	0.70792	6.11111
2007-03-22	81	10.4	0.597484	11.1111
2007-03-23	82	11.2	0.569168	11.6667
2007-03-24	83	11.5	2.03881	12.5
2007-03-25	84	11.4	5.97484	10.5556
2007-03-26	85	10.6	1.81794	6.94444
2007-03-27	86	9.6	1.33372	8.33333
2007-03-28	87	9.3	0.940118	8.05556
2007-03-29	88	10.15	0.790039	11.3889
2007-03-30	89	11	0.730573	12.2222
2007-03-31	90	11.8	1.97934	9.16667
2007-04-01	91	10.5	1.37053	5.83333
2007-04-02	92	9.5	0.733405	6.66667
2007-04-03	93	8.8	0.648455	6.94444
2007-04-04	94	10.4	0.634296	13.8889
2007-04-05	95	12.3	0.583326	15
2007-04-06	96	14	0.535188	17.2222
2007-04-07	97	14.6	2.94495	14.7222
2007-04-08	98	13.2	1.67069	11.1111
2007-04-09	99	12	2.82885	10.2778
2007-04-10	100	11.6	1.4215	10.2778
2007-04-11	101	11.3	1.01091	9.16667
2007-04-12	102	10.3	1.01657	8.61111
2007-04-13	103	10.5	0.767385	10.8333
2007-04-14	104	11.7	1.24594	10
2007-04-15	105	11.7	0.818356	9.16667
2007-04-16	106	10.8	0.688098	7.22222
2007-04-17	107	10.4	1.35637	7.5
2007-04-18	108	9.7	2.63346	7.5
2007-04-19	109	9.9	1.44416	8.61111
2007-04-20	110	10.7	0.838177	9.44444
2007-04-21	111	11.3	1.25443	8.88889
2007-04-22	112	11.4	1.44982	12.2222
2007-04-23	113	12.4	0.7419	13.0556
2007-04-24	114	13.1	0.608811	12.7778
2007-04-25	115	12.8	0.509702	11.6667
2007-04-26	116	13	0.487049	12.7778
2007-04-27	117	14.1	0.481386	15.8333
2007-04-28	118	15.1	0.444574	15.5556
2007-04-29	119	14.9	0.396435	13.3333
2007-04-30	120	14.2	0.368118	11.6667
2007-05-01	121	13.8	0.368118	11.9444
2007-05-02	122	13.3	1.58008	9.44444
2007-05-03	123	12.2	1.4923	9.44444
2007-05-04	124	11.7	1.82077	10
2007-05-05	125	11.8	0.651286	9.44444
2007-05-06	126	12.6	0.495544	13.3333
2007-05-07	127	14.7	0.441742	18.8889
2007-05-08	128	16.3	0.402099	16.9444
2007-05-09	129	15.6	0.359623	13.3333
2007-05-10	130	15	0.356792	14.7222
2007-05-11	131	14.8	0.31998	13.8889
2007-05-12	132	14.2	0.328475	11.6667
2007-05-13	133	13.5	0.396435	11.3889
2007-05-14	134	13.8	0.300158	16.3889
2007-05-15	135	15.9	0.276938	20.5556
2007-05-16	136	16.4	0.261081	14.4444
2007-05-17	137	16.1	0.247772	15
2007-05-18	138	15.9	0.230216	16.1111
2007-05-19	139	15.7	0.263346	14.4444
2007-05-20	140	14.5	0.603148	10.8333
2007-05-21	141	13.9	0.436079	11.6667
2007-05-22	142	13.4	0.33697	13.6111
2007-05-23	143	14.1	0.288831	15
2007-05-24	144	15.6	0.288831	17.2222
2007-05-25	145	16.4	0.257683	18.6111
2007-05-26	146	17.1	0.245223	17.7778
2007-05-27	147	16	0.232481	12.7778
2007-05-28	148	14.8	0.224835	15
2007-05-29	149	15.9	0.215208	20
2007-05-30	150	17.9	0.210677	22.7778
2007-05-31	151	18.8	0.215208	21.1111
2007-06-01	152	19.4	0.201899	20.2778
2007-06-02	153	19.7	0.197934	21.6667
2007-06-03	154	20.2	0.192554	22.5
2007-06-04	155	20	0.191705	19.4444
2007-06-05	156	18.4	0.339802	13.6111
2007-06-06	157	16.8	0.201049	13.6111
2007-06-07	158	16.4	0.18236	14.1667
2007-06-08	159	16	0.180661	16.3889
2007-06-09	160	15.8	0.495544	14.1667
2007-06-10	161	16.1	0.283168	16.1111
2007-06-11	162	15.6	0.193121	14.1667
2007-06-12	163	16	0.164237	16.9444
2007-06-13	164	17	0.153194	16.9444
2007-06-14	165	16.8	0.152911	16.3889
2007-06-15	166	16.8	0.152911	17.5
2007-06-16	167	16	0.185758	15.5556
2007-06-17	168	15.5	0.158857	14.7222
2007-06-18	169	15.6	0.156026	15.5556
2007-06-19	170	16.6	0.15376	18.8889
2007-06-20	171	18.1	0.15376	21.3889
2007-06-21	172	18.7	0.146964	18.8889
2007-06-22	173	18.3	0.146681	16.9444
2007-06-23	174	17.2	0.146681	15.8333
2007-06-24	175	16.2	0.288831	14.7222
2007-06-25	176	16.3	0.193121	15.8333
2007-06-26	177	17.6	0.155459	21.1111
2007-06-27	178	17.8	0.141867	18.6111
2007-06-28	179	17.8	0.211243	18.0556
2007-06-29	180	17.5	0.254285	16.6667
2007-06-30	181	17.7	0.195669	17.5
2007-07-01	182	18.1	0.165653	18.6111
2007-07-02	183	18.8	0.151778	20.2778
2007-07-03	184	19.7	0.152061	22.2222
2007-07-04	185	20.8	0.139319	23.8889
2007-07-05	186	21.6	0.14215	23.6111
2007-07-06	187	21	0.13139	21.1111
2007-07-07	188	20.4	0.127142	20.5556
2007-07-08	189	20.1	0.120913	20
2007-07-09	190	20.6	0.135354	22.7778
2007-07-10	191	21.6	0.112418	27.7778
2007-07-11	192	21.95	0.106188	27.2222
2007-07-12	193	22.3	0.0957108	23.8889
2007-07-13	194	22.4	0.0979761	22.5
2007-07-14	195	22.4	0.0979761	24.4444
2007-07-15	196	21.8	0.0979761	22.2222
2007-07-16	197	21	0.104206	21.3889
2007-07-17	198	20	0.16537	19.4444
2007-07-18	199	19.2	0.37095	19.1667
2007-07-19	200	19.6	0.168202	20.2778
2007-07-20	201	19.2	0.120913	19.7222
2007-07-21	202	18.8	0.111851	20.5556
2007-07-22	203	19.8	0.111568	23.8889
2007-07-23	204	20.5	0.113267	20.8333
2007-07-24	205	19.8	0.106754	18.3333
2007-07-25	206	19.6	0.103356	20.8333
2007-07-26	207	19.7	0.103356	19.7222
2007-07-27	208	20	0.0968435	21.1111
2007-07-28	209	20.1	0.0968435	20.8333
2007-07-29	210	19.7	0.0951444	19.1667
2007-07-30	211	19.1	0.0968435	19.1667
2007-07-31	212	19.2	0.0968435	21.1111
2007-08-01	213	19.6	0.0911801	23.6111
2007-08-02	214	20.4	0.0874989	24.4444
2007-08-03	215	20.2	0.0843841	19.7222
2007-08-04	216	19.4	0.0852336	20
2007-08-05	217	18.8	0.0872157	19.1667
2007-08-06	218	18.3	0.0900474	18.0556
2007-08-07	219	18.2	0.100525	17.7778
2007-08-08	220	18.4	0.0923128	20.2778
2007-08-09	221	18.7	0.0962771	19.1667
2007-08-10	222	18.2	0.0880652	18.6111
2007-08-11	223	18.2	0.0880652	18.8889
2007-08-12	224	18	0.0857999	16.1111
2007-08-13	225	17.7	0.0857999	20.2778
2007-08-14	226	18.9	0.0857999	22.7778
2007-08-15	227	19.9	0.0818356	23.6111
2007-08-16	228	19.2	0.0818356	20
2007-08-17	229	18.5	0.0795702	19.4444
2007-08-18	230	18.3	0.0795702	18.6111
2007-08-19	231	17.6	0.430415	17.7778
2007-08-20	232	18.1	0.393604	17.7778
2007-08-21	233	18.9	0.142434	20.8333
2007-08-22	234	18.6	0.0931623	19.4444
2007-08-23	235	18.5	0.0852336	21.6667
2007-08-24	236	19	0.0826851	21.6667
2007-08-25	237	19.1	0.0880652	18.8889
2007-08-26	238	18.9	0.0761722	18.3333
2007-08-27	239	17.8	0.0739068	18.3333
2007-08-28	240	17.7	0.0787207	21.1111
2007-08-29	241	18.2	0.0713583	23.8889
2007-08-30	242	19.3	0.070792	24.4444
2007-08-31	243	19.5	0.0699425	20
2007-09-01	244	18.7	0.0761722	20.2778
2007-09-02	245	18.5	0.0778712	20.5556
2007-09-03	246	18.8	0.0818356	21.6667
2007-09-04	247	19	0.225968	19.4444
2007-09-05	248	18.6	0.112135	20.5556
2007-09-06	249	18.2	0.109869	18.6111
2007-09-07	250	17.4	0.0940118	17.5
2007-09-08	251	17.1	0.0744732	20.5556
2007-09-09	252	16.9	0.0645623	21.3889
2007-09-10	253	17.2	0.0679603	22.7778
2007-09-11	254	17.5	0.0702257	21.6667
2007-09-12	255	17.7	0.0716415	18.6111
2007-09-13	256	17	0.0787207	15.5556
2007-09-14	257	16.8	0.0940118	16.9444
2007-09-15	258	16.8	0.0897643	16.6667
2007-09-16	259	16.5	0.0962771	16.1111
2007-09-17	260	16.2	0.207845	16.1111
2007-09-18	261	15.5	0.151212	12.7778
2007-09-19	262	14.9	0.124028	14.7222
2007-09-20	263	15	0.104772	13.6111
2007-09-21	264	15	0.10279	16.1111
2007-09-22	265	15.3	0.0962771	15.8333
2007-09-23	266	14.8	0.0838177	13.8889
2007-09-24	267	14.1	0.0821187	14.1667
2007-09-25	268	13.7	0.0914633	13.6111
2007-09-26	269	13.6	0.0945781	16.3889
2007-09-27	270	13.9	0.112418	16.3889
2007-09-28	271	14	0.841009	11.3889
2007-09-29	272	13.3	0.197368	11.1111
2007-09-30	273	13.2	0.988256	11.9444
2007-10-01	274	13.2	0.620138	14.1667
2007-10-02	275	13.8	0.552178	13.8889
2007-10-03	276	13.6	1.66786	11.3889
2007-10-04	277	13.2	0.538019	11.6667
2007-10-05	278	12.5	0.331307	10
2007-10-06	279	12	0.254851	10.8333
2007-10-07	280	12.8	0.70792	14.7222
2007-10-08	281	13.2	0.566336	11.9444
2007-10-09	282	13	0.339802	13.8889
2007-10-10	283	13.4	0.991088	12.2222
2007-10-11	284	13	0.566336	12.2222
2007-10-12	285	13	0.252869	13.8889
2007-10-13	286	12.9	0.181794	13.6111
2007-10-14	287	12.6	0.15914	13.6111
2007-10-15	288	12.6	0.147814	13.8889
2007-10-16	289	12.2	0.70792	10.5556
2007-10-17	290	11.75	0.80986	10.2778
2007-10-18	291	11.3	2.06429	13.3333
2007-10-19	292	12.1	3.22812	11.9444
2007-10-20	293	10.6	6.42791	10.2778
2007-10-21	294	11.1	1.67919	12.5
2007-10-22	295	11.7	0.574831	13.6111
2007-10-23	296	11.8	0.430415	15.5556
2007-10-24	297	12	0.40493	9.16667
2007-10-25	298	11	0.385108	7.77778
2007-10-26	299	9.7	0.275239	10.5556
2007-10-27	300	9.4	0.21181	10
2007-10-28	301	9.2	0.196519	9.72222
2007-10-29	302	9.2	0.191988	9.44444
2007-10-30	303	9.5	0.184909	9.72222
2007-10-31	304	8.7	0.180095	7.22222
2007-11-01	305	8.9	0.165653	8.61111
2007-11-02	306	8.2	0.156875	6.38889
2007-11-03	307	7.7	0.156026	9.44444
2007-11-04	308	8.3	0.15461	11.6667
2007-11-05	309	8.9	0.148097	10.8333
2007-11-06	310	8.8	0.149796	8.05556
2007-11-07	311	8.9	0.143	9.44444
2007-11-08	312	9	0.139885	8.88889
2007-11-09	313	9.4	0.161406	10.2778
2007-11-10	314	10.4	0.80986	10
2007-11-11	315	9.7	0.348297	10
2007-11-12	316	9.6	0.685267	10.8333
2007-11-13	317	8.8	0.529524	6.94444
2007-11-14	318	8.9	0.280903	6.11111
2007-11-15	319	9	0.249754	10.5556
2007-11-16	320	10.7	2.5202	11.6667
2007-11-17	321	11.3	6.42791	12.7778
2007-11-18	322	10.3	4.2192	6.11111
2007-11-19	323	8.8	5.52178	5.55556
2007-11-20	324	8.7	2.20022	5.55556
2007-11-21	325	7.9	0.928791	4.72222
2007-11-22	326	6.5	0.659781	5
2007-11-23	327	5.4	0.512534	2.77778
2007-11-24	328	5	0.453069	1.94444
2007-11-25	329	4.7	0.399267	2.22222
2007-11-26	330	4.3	0.659781	1.66667
2007-11-27	331	4.9	1.74148	5.27778
2007-11-28	332	5.7	1.54043	2.5
2007-11-29	333	5.9	2.35879	4.44444
2007-11-30	334	6.3	1.16382	3.33333
2007-12-01	335	5.9	0.934454	3.33333
2007-12-02	336	6.2	8.01365	6.94444
2007-12-03	337	9.2	39.9267	10.8333
2007-12-04	338	10.9	20.3881	11.6667
2007-12-05	339	10	3.99267	5.83333
2007-12-06	340	9.7	4.41742	7.22222
2007-12-07	341	9.3	3.05821	5.83333
2007-12-08	342	8.2	2.06429	2.77778
2007-12-09	343	6.5	1.64804	0
2007-12-10	344	6.2	1.60556	3.88889
2007-12-11	345	5.5	1.39319	1.11111
2007-12-12	346	5.5	1.15816	3.33333
2007-12-13	347	5.3	1.05055	1.66667
2007-12-14	348	5.5	0.991088	3.88889
2007-12-15	349	6.2	1.29408	6.94444
2007-12-16	350	6.5	1.22895	5.83333
2007-12-17	351	6.7	1.65936	5.83333
2007-12-18	352	7.1	2.88831	8.05556
2007-12-19	353	7.6	3.90772	7.5
2007-12-20	354	7.4	6.34296	4.72222
2007-12-21	355	6.7	2.48055	4.16667
2007-12-22	356	6.4	2.40126	5
2007-12-23	357	7.7	4.70059	8.88889
2007-12-24	358	7.8	8.35346	3.61111
2007-12-25	359	6.6	3.76613	2.22222
2007-12-26	360	5.8	4.24752	2.77778
2007-12-27	361	5.8	4.81386	3.33333
2007-12-28	362	6.1	4.95544	5.55556
2007-12-29	363	7.1	2.97326	5
2007-12-30	364	6.6	3.31307	3.61111
2007-12-31	365	5.8	2.19738	2.22222
2008-01-01	1	5.5	1.77263	5
2008-01-02	2	5.5	5.35188	3.05556
2008-01-03	3	6.6	6.85267	5.83333
2008-01-04	4	7.3	5.35188	8.05556
2008-01-05	5	6.8	7.05088	5
2008-01-06	6	6.5	3.99267	4.16667
2008-01-07	7	6.4	3.08653	3.88889
2008-01-08	8	5.6	6.93762	5
2008-01-09	9	6.2	4.61564	3.88889
2008-01-10	10	7.1	5.15366	7.77778
2008-01-11	11	8.2	4.559	8.61111
2008-01-12	12	8.4	4.64396	7.5
2008-01-13	13	8.1	2.69576	6.38889
2008-01-14	14	7.6	3.00158	4.72222
2008-01-15	15	6.3	3.25643	2.77778
2008-01-16	16	5.6	1.84909	0.555556
2008-01-17	17	5	1.56026	0.277778
2008-01-18	18	5.1	1.3762	2.77778
2008-01-19	19	5.2	1.24594	2.77778
2008-01-20	20	5.6	1.18647	3.88889
2008-01-21	21	4.1	0.97693	0.555556
2008-01-22	22	2.5	0.855167	0.277778
2008-01-23	23	1.9	0.795702	1.11111
2008-01-24	24	1.8	0.773049	1.11111
2008-01-25	25	2	0.710752	0.833333
2008-01-26	26	2.4	2.00766	0.277778
2008-01-27	27	3.2	3.62455	3.05556
2008-01-28	28	4.1	1.61406	3.61111
2008-01-29	29	4.4	3.56792	3.88889
2008-01-30	30	4.4	3.42633	3.88889
2008-01-31	31	5.2	6.88098	6.38889
2008-02-01	32	5.7	3.90772	4.72222
2008-02-02	33	5.1	6.37128	2.77778
2008-02-03	34	5.4	4.84217	3.33333
2008-02-04	35	5.7	2.17473	2.77778
2008-02-05	36	6.1	1.89439	6.11111
2008-02-06	37	5.8	2.48622	4.72222
2008-02-07	38	5.8	8.60831	7.5
2008-02-08	39	6.7	3.56792	7.5
2008-02-09	40	7.5	2.54002	10.8333
2008-02-10	41	8.4	1.8236	9.44444
2008-02-11	42	8.2	1.44133	6.66667
2008-02-12	43	7.7	1.22045	6.66667
2008-02-13	44	7.4	1.16099	4.72222
2008-02-14	45	7	1.03923	4.44444
2008-02-15	46	6.9	0.877821	5.27778
2008-02-16	47	6.9	0.801365	5
2008-02-17	48	6.5	0.733405	7.22222
2008-02-18	49	6.8	0.69093	7.77778
2008-02-19	50	6.8	0.662613	6.94444
2008-02-20	51	7.6	0.634296	7.77778
2008-02-21	52	7.6	0.600316	7.77778
2008-02-22	53	7.8	0.574831	9.44444
2008-02-23	54	7.4	0.540851	6.66667
2008-02-24	55	8	0.608811	9.72222
2008-02-25	56	8.7	0.583326	9.44444
2008-02-26	57	8.5	0.591821	8.05556
2008-02-27	58	8.7	0.472891	11.1111
2008-02-28	59	9.15	0.461564	11.3889
2008-02-29	60	9.6	0.549346	11.6667
2008-03-01	61	9.4	1.04489	6.94444
2008-03-02	62	8.3	0.756059	5.83333
2008-03-03	63	7.8	0.563504	7.22222
2008-03-04	64	7.8	0.557841	6.38889
2008-03-05	65	7.8	0.478554	7.5
2008-03-06	66	7.7	0.450237	7.5
2008-03-07	67	7.5	0.43891	6.38889
2008-03-08	68	8.3	2.09544	8.33333
2008-03-09	69	8.7	0.736237	10
2008-03-10	70	9.9	0.60598	13.6111
2008-03-11	71	10.3	0.72491	8.05556
2008-03-12	72	9.9	0.608811	8.33333
2008-03-13	73	9.4	3.3697	9.44444
2008-03-14	74	8.9	4.41742	8.61111
2008-03-15	75	8.9	2.63913	8.05556
2008-03-16	76	8.7	1.69618	7.5
2008-03-17	77	8.6	1.51495	9.16667
2008-03-18	78	9.5	3.59623	9.44444
2008-03-19	79	9.5	1.61406	7.77778
2008-03-20	80	9.2	1.53194	7.22222
2008-03-21	81	8.5	1.70467	6.38889
2008-03-22	82	8.4	1.02224	7.77778
2008-03-23	83	9.1	1.80661	8.33333
2008-03-24	84	8.9	1.51212	6.94444
2008-03-25	85	8.4	0.985425	6.66667
2008-03-26	86	8.1	2.86	6.11111
2008-03-27	87	7.8	1.56309	6.11111
2008-03-28	88	7.7	2.14641	5
2008-03-29	89	7.1	1.99067	4.72222
2008-03-30	90	7	1.87457	4.16667
2008-03-31	91	7.5	1.46681	5.83333
2008-04-01	92	8.1	1.0902	6.11111
2008-04-02	93	8.7	0.923128	7.77778
2008-04-03	94	9.2	0.815524	8.88889
2008-04-04	95	9.5	1.12701	8.61111
2008-04-05	96	9.6	0.954276	8.33333
2008-04-06	97	9.8	1.05622	9.44444
2008-04-07	98	9.8	1.04772	8.33333
2008-04-08	99	9.9	0.829682	8.05556
2008-04-09	100	9.7	1.16665	8.61111
2008-04-10	101	10.2	0.923128	9.44444
2008-04-11	102	10.6	0.696593	11.6667
2008-04-12	103	12.5	0.63996	15.8333
2008-04-13	104	13.7	0.597484	13.3333
2008-04-14	105	12.8	0.659781	6.94444
2008-04-15	106	11.55	0.730573	6.66667
2008-04-16	107	10.3	0.807029	9.44444
2008-04-17	108	10.7	0.591821	11.1111
2008-04-18	109	10.6	0.549346	7.22222
2008-04-19	110	9.5	0.521029	5.55556
2008-04-20	111	8.9	0.532356	5.83333
2008-04-21	112	9	0.538019	6.11111
2008-04-22	113	9	1.43566	8.05556
2008-04-23	114	8.9	3.25643	8.61111
2008-04-24	115	9.1	1.47247	8.33333
2008-04-25	116	9.6	0.931623	8.05556
2008-04-26	117	11	0.676772	12.7778
2008-04-27	118	12.4	0.577663	14.4444
2008-04-28	119	13.3	0.555009	14.7222
2008-04-29	120	12.2	1.07604	8.33333
2008-04-30	121	11.8	1.27142	8.33333
2008-05-01	122	11.6	0.668276	10.2778
2008-05-02	123	12.8	0.538019	15
2008-05-03	124	13.5	0.560673	10.8333
2008-05-04	125	13.5	0.540851	13.3333
2008-05-05	126	14.9	0.441742	16.3889
2008-05-06	127	14.6	0.410594	13.0556
2008-05-07	128	13.1	0.393604	10.8333
2008-05-08	129	12.2	0.385108	10.2778
2008-05-09	130	12.2	0.40493	11.6667
2008-05-10	131	12.7	0.365287	13.3333
2008-05-11	132	12.6	0.351128	10.5556
2008-05-12	133	12.2	0.325643	11.6667
2008-05-13	134	12.5	0.362455	12.5
2008-05-14	135	13.7	0.413425	17.7778
2008-05-15	136	16.1	0.325643	21.3889
2008-05-16	137	18.3	0.297326	23.0556
2008-05-17	138	20	0.280903	25.8333
2008-05-18	139	20.3	0.263346	21.6667
2008-05-19	140	19.9	0.25202	21.1111
2008-05-20	141	18.2	1.00241	14.4444
2008-05-21	142	16.1	0.526692	12.7778
2008-05-22	143	14.1	0.458732	11.9444
2008-05-23	144	13.1	0.608811	11.1111
2008-05-24	145	14.4	0.557841	17.7778
2008-05-25	146	15.1	1.12701	13.8889
2008-05-26	147	14.8	0.965603	14.7222
2008-05-27	148	15.1	0.577663	16.6667
2008-05-28	149	15	0.546514	13.6111
2008-05-29	150	14.5	1.06754	13.3333
2008-05-30	151	15.2	0.538019	15.8333
2008-05-31	152	15.8	0.393604	16.1111
2008-06-01	153	15.3	0.376613	12.5
2008-06-02	154	15	0.38794	14.7222
2008-06-03	155	14.5	3.48297	15.2778
2008-06-04	156	14.6	0.934454	12.7778
2008-06-05	157	13.7	0.552178	11.6667
2008-06-06	158	12.8	0.487049	11.6667
2008-06-07	159	12.7	0.441742	12.2222
2008-06-08	160	13.9	0.399267	14.7222
2008-06-09	161	14.5	0.331307	14.1667
2008-06-10	162	13	0.339802	10.5556
2008-06-11	163	12.9	0.31998	12.2222
2008-06-12	164	13.5	0.288831	16.3889
2008-06-13	165	15.1	0.267027	16.6667
2008-06-14	166	15.5	0.241542	14.4444
2008-06-15	167	16	0.220871	16.1111
2008-06-16	168	16.6	0.203881	16.9444
2008-06-17	169	16.3	0.188873	14.7222
2008-06-18	170	15.6	0.174148	15
2008-06-19	171	16.1	0.172449	18.3333
2008-06-20	172	17.3	0.182077	21.9444
2008-06-21	173	17.8	0.168768	22.5
[truncated: 3,480 more rows]

## Sheet: Irondequoit Creek
Date	DOY	Tw	Q (m3/s)	Ta
2005-01-01	1	4.5	6.76772	6.11111
2005-01-02	2	4	5.55009	3.88889
2005-01-03	3	5	5.35188	5
2005-01-04	4	5	8.89148	1.11111
2005-01-05	5	4	7.50395	-2.77778
2005-01-06	6	3	6.54118	-0.555556
2005-01-07	7	2.5	8.01365	-2.22222
2005-01-08	8	2.5	6.34296	-1.11111
2005-01-09	9	3	5.38019	-0.555556
2005-01-10	10	3.5	5.57841	2.22222
2005-01-11	11	3.5	5.88989	-1.66667
2005-01-12	12	3.5	7.73049	5
2005-01-13	13	4.5	15.0079	10
2005-01-14	14	4.5	19.7368	-2.77778
2005-01-15	15	2	12.8841	-7.22222
2005-01-16	16	2	6.99425	-6.11111
2005-01-17	17	1.5	5.09702	-10
2005-01-18	18	1	3.96435	-15.5556
2005-01-19	19	1	4.10594	-10
2005-01-20	20	1	4.10594	-8.33333
2005-01-21	21	1	3.5396	-17.7778
2005-01-22	22	1	2.83168	-17.2222
2005-01-23	23	1	3.11485	-16.6667
2005-01-24	24	1	3.39802	-13.3333
2005-01-25	25	1	3.5396	-6.66667
2005-01-26	26	1	3.39802	-8.88889
2005-01-27	27	1	3.25643	-16.6667
2005-01-28	28	1	2.83168	-15
2005-01-29	29	0.5	2.83168	-8.88889
2005-01-30	30	1	3.11485	-7.77778
2005-01-31	31	1	2.83168	-8.33333
2005-02-01	32	0.5	2.83168	-9.44444
2005-02-02	33	0.5	2.6901	-7.77778
2005-02-03	34	1	3.22812	-2.22222
2005-02-04	35	1	3.28475	-1.66667
2005-02-05	36	1	3.34138	-1.66667
2005-02-06	37	1	3.42633	1.66667
2005-02-07	38	2.5	3.76613	5.55556
2005-02-08	39	2.5	7.05088	3.33333
2005-02-09	40	1.5	10.4772	-1.66667
2005-02-10	41	1	8.83484	-3.88889
2005-02-11	42	1	6.79603	-5.55556
2005-02-12	43	1.5	6.2297	0
2005-02-13	44	1.5	5.09702	-5
2005-02-14	45	1.5	5.38019	-0.555556
2005-02-15	46	2.5	13.7053	6.11111
2005-02-16	47	1.5	19.0572	0.555556
2005-02-17	48	1.5	13.4788	-3.88889
2005-02-18	49	1	8.86316	-10.5556
2005-02-19	50	1	5.94653	-7.77778
2005-02-20	51	1	5.38019	-7.22222
2005-02-21	52	1.5	5.09702	-0.555556
2005-02-22	53	2.5	5.09702	-1.11111
2005-02-23	54	2	4.81386	-7.22222
2005-02-24	55	1	4.24752	-10
2005-02-25	56	1	4.24752	-8.88889
2005-02-26	57	1.5	3.96435	-4.44444
2005-02-27	58	1.5	3.68118	-7.22222
2005-02-28	59	2	3.68118	-1.66667
2005-03-01	60	1.5	3.96435	-2.77778
2005-03-02	61	1.5	3.96435	-5.55556
2005-03-03	62	1	3.68118	-7.22222
2005-03-04	63	1.5	3.68118	-6.66667
2005-03-05	64	1.5	3.5396	-6.66667
2005-03-06	65	2	3.96435	-0.555556
2005-03-07	66	3	6.5695	4.44444
2005-03-08	67	1.5	14.6964	-7.22222
2005-03-09	68	1	10.7604	-9.44444
2005-03-10	69	1	7.7588	-7.22222
2005-03-11	70	1.5	5.38019	-3.88889
2005-03-12	71	2.5	4.81386	-3.33333
2005-03-13	72	2.5	4.53069	-5
2005-03-14	73	2	3.96435	-5
2005-03-15	74	2.5	3.68118	-3.33333
2005-03-16	75	3	4.10594	-2.22222
2005-03-17	76	3	3.96435	-0.555556
2005-03-18	77	3.5	4.81386	-2.22222
2005-03-19	78	3	4.53069	-1.66667
2005-03-20	79	3.5	5.38019	0.555556
2005-03-21	80	4	7.22078	2.22222
2005-03-22	81	4	9.54276	1.66667
2005-03-23	82	3.5	10.4206	-0.555556
2005-03-24	83	3	8.18356	2.22222
2005-03-25	84	4	9.00474	0.555556
2005-03-26	85	4	8.04197	1.11111
2005-03-27	86	5	8.49504	3.88889
2005-03-28	87	5.5	10.1091	4.44444
2005-03-29	88	5.5	10.3639	6.66667
2005-03-30	89	5.5	8.63662	6.66667
2005-03-31	90	7	7.22078	12.2222
2005-04-01	91	8.5	6.45623	10
2005-04-02	92	7	21.3226	4.44444
2005-04-03	93	4.5	70.2257	2.77778
2005-04-04	94	5	58.3326	5.55556
2005-04-05	95	7	20.4164	7.77778
2005-04-06	96	8.5	13.0257	10
2005-04-07	97	9	9.62771	10.5556
2005-04-08	98	9	7.64554	6.66667
2005-04-09	99	10	6.45623	7.77778
2005-04-10	100	10	5.49346	8.88889
2005-04-11	101	10	4.61564	3.33333
2005-04-12	102	9	4.27584	3.33333
2005-04-13	103	9	3.99267	3.88889
2005-04-14	104	9.5	3.11485	5
2005-04-15	105	10	2.53152	6.66667
2005-04-16	106	10.5	2.42675	10
2005-04-17	107	11.5	2.64479	13.3333
2005-04-18	108	12.5	3.11485	12.7778
2005-04-19	109	13.5	3.17148	16.1111
2005-04-20	110	14	3.85108	13.3333
2005-04-21	111	12	5.66336	5.55556
2005-04-22	112	11.5	4.75722	8.33333
2005-04-23	113	11	13.2806	8.33333
2005-04-24	114	10	21.634	3.88889
2005-04-25	115	8.5	13.5921	3.88889
2005-04-26	116	9	8.46672	12.7778
2005-04-27	117	11	6.93762	12.2222
2005-04-28	118	11	5.60673	6.66667
2005-04-29	119	10.5	4.72891	6.66667
2005-04-30	120	10	4.95544	7.22222
2005-05-01	121	10	5.26692	7.22222
2005-05-02	122	10	4.3891	7.22222
2005-05-03	123	9.5	3.90772	6.11111
2005-05-04	124	9	3.79445	5.55556
2005-05-05	125	9.5	3.59623	7.22222
2005-05-06	126	11.5	3.34138	11.1111
2005-05-07	127	13	3.1998	11.6667
2005-05-08	128	13.5	3.0299	12.2222
2005-05-09	129	14	2.94495	13.8889
2005-05-10	130	15.5	2.88831	18.3333
2005-05-11	131	17	2.81469	17.2222
2005-05-12	132	14.5	2.66744	5.55556
2005-05-13	133	13	2.55984	7.77778
2005-05-14	134	14	3.08653	18.3333
2005-05-15	135	15.5	5.21029	12.7778
2005-05-16	136	14	3.34138	8.33333
2005-05-17	137	12	2.88831	7.22222
2005-05-18	138	13	2.79487	10
2005-05-19	139	13.5	2.62497	11.1111
2005-05-20	140	14.5	2.49471	12.7778
2005-05-21	141	15	2.37012	12.2222
2005-05-22	142	14	2.50037	9.44444
2005-05-23	143	13	2.58249	9.44444
2005-05-24	144	13	2.83168	10.5556
2005-05-25	145	14	2.76938	13.3333
2005-05-26	146	15	2.42392	15.5556
2005-05-27	147	15	2.24552	14.4444
2005-05-28	148	15	2.25119	13.3333
2005-05-29	149	14.5	2.10677	13.3333
2005-05-30	150	15	2.03031	13.8889
2005-05-31	151	16	1.96235	15.5556
2005-06-01	152	17	1.95386	17.2222
2005-06-02	153	17.5	1.90006	18.3333
2005-06-03	154	18	1.84342	18.3333
2005-06-04	155	17.5	1.82927	18.8889
2005-06-05	156	18.5	1.81511	22.2222
2005-06-06	157	19.5	1.73299	25.5556
2005-06-07	158	20.5	1.67635	22.7778
2005-06-08	159	21	1.57725	23.8889
2005-06-09	160	21	1.4923	26.1111
2005-06-10	161	21.5	1.75281	24.4444
2005-06-11	162	21.5	1.85758	25.5556
2005-06-12	163	22.5	6.79603	25
2005-06-13	164	23.5	5.12534	26.6667
2005-06-14	165	23	8.0986	25
2005-06-15	166	23	3.85108	21.1111
2005-06-16	167	20	3.48297	15
2005-06-17	168	17.5	3.59623	15.5556
2005-06-18	169	17	3.79445	15
2005-06-19	170	16.5	2.86	13.8889
2005-06-20	171	17	2.30499	16.6667
2005-06-21	172	18	2.03881	20
2005-06-22	173	19	1.96235	16.1111
2005-06-23	174	18.5	1.82077	16.6667
2005-06-24	175	19	1.67069	22.7778
2005-06-25	176	20.5	1.58291	26.6667
2005-06-26	177	21.5	1.46398	23.8889
2005-06-27	178	21.5	1.40734	25.5556
2005-06-28	179	22.5	1.4215	27.2222
2005-06-29	180	22	1.79245	24.4444
2005-06-30	181	21.5	1.7698	25
2005-07-01	182	21.5	1.48946	22.7778
2005-07-02	183	20	1.35354	17.2222
2005-07-03	184	19.5	1.29974	19.4444
2005-07-04	185	21	1.24877	25
2005-07-05	186	21.5	1.39035	25
2005-07-06	187	21	1.33938	20
2005-07-07	188	20.5	1.21762	20
2005-07-08	189	19.5	2.24552	19.4444
2005-07-09	190	19.5	2.91663	21.6667
2005-07-10	191	20	2.01616	22.7778
2005-07-11	192	21	1.716	24.4444
2005-07-12	193	22	1.45265	27.2222
2005-07-13	194	23	1.41584	27.7778
2005-07-14	195	23	1.59707	26.6667
2005-07-15	196	23	1.80378	25
2005-07-16	197	22.5	3.39802	25.5556
2005-07-17	198	23.5	4.30415	26.6667
2005-07-18	199	24	2.73257	26.6667
2005-07-19	200	24	2.1096	25.5556
2005-07-20	201	22.5	1.62538	22.2222
2005-07-21	202	22	1.52344	23.3333
2005-07-22	203	22	1.48946	25
2005-07-23	204	21.5	1.45548	21.1111
2005-07-24	205	20.5	1.37336	21.1111
2005-07-25	206	22	1.34222	26.6667
2005-07-26	207	22	1.5914	24.4444
2005-07-27	208	21.5	5.18197	18.3333
2005-07-28	209	20	2.86	18.3333
2005-07-29	210	19.5	1.86325	19.4444
2005-07-30	211	20	1.60839	20
2005-07-31	212	20	1.54043	20.5556
2005-08-01	213	20.5	1.37903	24.1667
2005-08-02	214	21.5	1.27992	25.5556
2005-08-03	215	22	1.22612	26.6667
2005-08-04	216	22.5	1.14683	27.7778
2005-08-05	217	22.5	1.03639	23.3333
2005-08-06	218	21	0.991088	21.1111
2005-08-07	219	20.5	0.996751	22.2222
2005-08-08	220	20.5	1.0279	23.6111
2005-08-09	221	21.5	1.01374	26.1111
2005-08-10	222	21.5	0.991088	26.9444
2005-08-11	223	22	0.974098	25.2778
2005-08-12	224	21	1.02224	23.3333
2005-08-13	225	21	1.11851	25.2778
2005-08-14	226	20.5	2.11243	20
2005-08-15	227	20	1.36487	21.6667
2005-08-16	228	20	1.15533	21.6667
2005-08-17	229	20	1.07321	20.2778
2005-08-18	230	19	1.03639	20.5556
2005-08-19	231	19.5	1.05622	23.8889
2005-08-20	232	20	1.63388	23.6111
2005-08-21	233	21.5	3.28475	22.7778
2005-08-22	234	20	1.43	19.4444
2005-08-23	235	19	1.18931	18.6111
2005-08-24	236	18.5	1.10436	17.7778
2005-08-25	237	18	1.00241	18.6111
2005-08-26	238	18.5	0.965603	21.3889
2005-08-27	239	18.5	0.937286	21.9444
2005-08-28	240	19.5	1.31956	23.6111
2005-08-29	241	19.4	1.27426	22.5
2005-08-30	242	19.3	5.66336	21.9444
2005-08-31	243	19.2	22.6534	20.2778
2005-09-01	244	19.1	8.80652	21.1111
2005-09-02	245	19	3.5396	20.8333
2005-09-03	246	19	2.48905	19.4444
2005-09-04	247	18.5	2.09544	16.9444
2005-09-05	248	17.5	1.76697	16.6667
2005-09-06	249	17.5	1.39602	20
2005-09-07	250	18	1.21762	20.5556
2005-09-08	251	17.5	1.1978	18.6111
2005-09-09	252	17.5	1.20913	18.3333
2005-09-10	253	16.5	1.1355	15.2778
2005-09-11	254	16	1.02507	17.7778
2005-09-12	255	17	0.988256	22.2222
2005-09-13	256	18	0.95994	23.0556
2005-09-14	257	18.5	0.928791	23.6111
2005-09-15	258	18.5	0.920296	20.5556
2005-09-16	259	18	14.0734	18.0556
2005-09-17	260	19	10.6188	19.7222
2005-09-18	261	18.5	4.0493	18.6111
2005-09-19	262	18.5	2.72408	19.7222
2005-09-20	263	18.5	2.49471	18.8889
2005-09-21	264	18	2.10111	19.7222
2005-09-22	265	17.5	1.78113	20.5556
2005-09-23	266	18	1.71033	15.2778
2005-09-24	267	16	1.61406	15.5556
2005-09-25	268	17	2.29083	21.6667
2005-09-26	269	18.5	5.94653	18.0556
2005-09-27	270	17.5	5.09702	15
2005-09-28	271	16	2.86	16.1111
2005-09-29	272	15.5	2.94495	13.8889
2005-09-30	273	14	2.35879	12.2222
2005-10-01	274	14	2.01616	16.6667
2005-10-02	275	14.5	1.85192	18.3333
2005-10-03	276	15.5	1.77263	20.8333
2005-10-04	277	16.5	1.61689	22.2222
2005-10-05	278	16.5	1.50362	20.8333
2005-10-06	279	17	1.38186	21.3889
2005-10-07	280	16.5	2.24269	15.5556
2005-10-08	281	14	4.07762	9.44444
2005-10-09	282	12.5	2.41259	10
2005-10-10	283	12.5	1.97934	12.2222
2005-10-11	284	13	1.95103	13.0556
2005-10-12	285	13.5	1.89156	13.8889
2005-10-13	286	13.5	1.90855	14.1667
2005-10-14	287	14	1.85192	14.1667
2005-10-15	288	14	1.7698	13.8889
2005-10-16	289	12.5	2.01616	11.6667
2005-10-17	290	12	1.90289	11.9444
2005-10-18	291	12	1.90572	10.8333
2005-10-19	292	11.5	1.63388	12.5
2005-10-20	293	10.5	1.46115	7.5
2005-10-21	294	10	1.38752	7.22222
2005-10-22	295	9.5	3.08653	6.66667
2005-10-23	296	9.5	8.04197	6.11111
2005-10-24	297	9.5	4.81386	5.83333
2005-10-25	298	9.5	8.77821	6.11111
2005-10-26	299	8.5	17.698	6.11111
2005-10-27	300	8.5	7.73049	5.27778
2005-10-28	301	8	3.93604	3.61111
2005-10-29	302	8.5	3.59623	7.22222
2005-10-30	303	9	3.08653	10.2778
2005-10-31	304	9	2.72974	12.2222
2005-11-01	305	10	2.44091	11.6667
2005-11-02	306	9.5	2.29932	8.05556
2005-11-03	307	9.5	3.14316	12.2222
2005-11-04	308	10	3.17148	12.2222
2005-11-05	309	10.5	2.58532	13.6111
2005-11-06	310	11.5	2.66461	16.1111
2005-11-07	311	10.5	2.91663	10
2005-11-08	312	10.5	2.47206	7.22222
2005-11-09	313	9	8.89148	8.61111
2005-11-10	314	8.5	11.3267	5.55556
2005-11-11	315	7.5	6.28633	4.16667
2005-11-12	316	7	4.10594	8.33333
2005-11-13	317	8	3.31307	13.8889
2005-11-14	318	9	2.88831	8.88889
2005-11-15	319	8.5	5.06871	10.8333
2005-11-16	320	10	5.86158	11.1111
2005-11-17	321	7.5	5.43683	0.277778
2005-11-18	322	5.5	3.90772	-1.38889
2005-11-19	323	5.5	3.22812	4.16667
2005-11-20	324	5.5	2.83168	7.22222
2005-11-21	325	6	2.62497	7.22222
2005-11-22	326	6.5	2.59099	-0.277778
2005-11-23	327	4	2.59099	-4.44444
2005-11-24	328	3	2.65328	-4.16667
2005-11-25	329	1.5	2.29083	-4.44444
2005-11-26	330	2	2.1096	-2.77778
2005-11-27	331	3	2.09544	1.11111
2005-11-28	332	5.5	2.48905	13.0556
2005-11-29	333	9.5	8.49504	12.7778
2005-11-30	334	8.5	15.8857	3.61111
2005-12-01	335	6.5	9.31623	1.11111
2005-12-02	336	5	6.08811	-1.38889
2005-12-03	337	3.5	4.78554	-3.05556
2005-12-04	338	3	3.96435	-2.22222
2005-12-05	339	2.5	3.56792	-3.33333
2005-12-06	340	2	3.34138	-5.27778
2005-12-07	341	1.5	2.94495	-5.83333
2005-12-08	342	1	2.6901	-6.94444
2005-12-09	343	1.5	3.31307	-1.66667
2005-12-10	344	2	3.22812	-1.38889
2005-12-11	345	2	3.1998	-0.833333
2005-12-12	346	2	2.97326	-6.11111
2005-12-13	347	1	2.57117	-8.33333
2005-12-14	348	0	2.28233	-11.3889
2005-12-15	349	0.5	2.55134	-5
2005-12-16	350	1	3.1998	0.277778
2005-12-17	351	1.5	3.22812	-1.94444
2005-12-18	352	2	3.0299	-3.33333
2005-12-19	353	1.5	2.94495	-5.55556
2005-12-20	354	0.5	2.78354	-5
2005-12-21	355	1	2.79204	-6.11111
2005-12-22	356	1.5	2.77221	0.277778
2005-12-23	357	2.5	2.88831	3.05556
2005-12-24	358	3	3.73782	3.61111
2005-12-25	359	3	4.95544	2.77778
2005-12-26	360	3	7.81544	1.38889
2005-12-27	361	2	7.30573	0.555556
2005-12-28	362	2.5	5.43683	2.22222
2005-12-29	363	3.5	4.70059	3.61111
2005-12-30	364	3	4.47405	-0.833333
2005-12-31	365	2.5	3.90772	-1.66667
2006-01-01	1	2.5	3.56792	0.277778
2006-01-02	2	3.5	3.85108	2.22222
2006-01-03	3	4	5.40851	3.05556
2006-01-04	4	3.5	5.26692	2.77778
2006-01-05	5	4	5.88989	2.77778
2006-01-06	6	3	5.21029	-3.33333
2006-01-07	7	2	4.24752	-4.16667
2006-01-08	8	2.5	3.79445	1.66667
2006-01-09	9	3.5	3.68118	5.83333
2006-01-10	10	3.5	3.51128	2.5
2006-01-11	11	4.5	3.93604	8.61111
2006-01-12	12	5.5	5.29524	6.94444
2006-01-13	13	4.5	4.3891	10.5556
2006-01-14	14	5.5	11.2701	2.5
2006-01-15	15	2	11.1002	-8.61111
2006-01-16	16	0.5	5.63504	-9.44444
2006-01-17	17	1	4.72891	-1.66667
2006-01-18	18	2.5	8.35346	3.33333
2006-01-19	19	2	7.30573	1.94444
2006-01-20	20	3.5	6.08811	9.16667
2006-01-21	21	5	5.55009	5.83333
2006-01-22	22	3.5	4.61564	0.277778
2006-01-23	23	3.5	4.13425	3.05556
2006-01-24	24	3	3.96435	1.94444
2006-01-25	25	3.5	4.10594	-0.833333
2006-01-26	26	1.5	3.8794	-7.77778
2006-01-27	27	1	3.34138	-3.33333
2006-01-28	28	2.5	3.56792	5.83333
2006-01-29	29	3.5	6.14475	6.66667
2006-01-30	30	4.5	8.32514	7.77778
2006-01-31	31	4.5	5.91821	2.77778
2006-02-01	32	4	4.559	0.833333
2006-02-02	33	4.5	4.02099	7.5
2006-02-03	34	5.5	5.86158	4.72222
2006-02-04	35	5	6.88098	3.33333
2006-02-05	36	5	10.5622	2.22222
2006-02-06	37	3	7.05088	-2.22222
2006-02-07	38	2	5.21029	-3.33333
2006-02-08	39	2	4.58732	-6.38889
2006-02-09	40	1	4.16257	-7.77778
2006-02-10	41	1	4.02099	-6.38889
2006-02-11	42	1.5	3.85108	-4.44444
2006-02-12	43	1.5	3.76613	-6.11111
2006-02-13	44	1.5	3.45465	-4.72222
2006-02-14	45	2	3.51128	0
2006-02-15	46	3.5	3.85108	5.27778
2006-02-16	47	4	5.32356	7.77778
2006-02-17	48	4	5.63504	5.55556
2006-02-18	49	1.5	4.3891	-6.94444
2006-02-19	50	0.5	3.25643	-9.16667
2006-02-20	51	0.5	3.08653	-6.11111
2006-02-21	52	1.5	2.94495	-2.22222
2006-02-22	53	2	2.88831	0
2006-02-23	54	3	3.1998	1.94444
2006-02-24	55	2.5	3.62455	-3.05556
2006-02-25	56	2	3.34138	0
2006-02-26	57	1.5	3.22812	-8.05556
2006-02-27	58	1	3.0299	-8.88889
2006-02-28	59	1	3.11485	-9.44444
2006-03-01	60	1.5	3.05821	-3.88889
2006-03-02	61	1.5	2.94495	-4.72222
2006-03-03	62	1	2.83168	-5.55556
2006-03-04	63	1.5	2.72974	-1.11111
2006-03-05	64	2.5	2.72408	-0.555556
2006-03-06	65	2.5	2.7354	-2.5
2006-03-07	66	2.5	2.65045	-2.5
2006-03-08	67	2.5	2.59382	-0.277778
2006-03-09	68	4	4.10594	7.77778
2006-03-10	69	5	5.43683	10
2006-03-11	70	5.5	4.64396	6.11111
2006-03-12	71	6	4.0493	9.44444
2006-03-13	72	8	9.11801	12.5
2006-03-14	73	8	20.6429	6.94444
2006-03-15	74	5	12.2045	1.38889
2006-03-16	75	4.5	6.3996	1.38889
2006-03-17	76	4	4.75722	-1.94444
2006-03-18	77	3.5	3.96435	-2.77778
2006-03-19	78	3	3.59623	-0.833333
2006-03-20	79	3	3.3697	-2.77778
2006-03-21	80	3.5	3.14316	-2.77778
2006-03-22	81	3.5	3.05821	-0.555556
2006-03-23	82	3.5	3.00158	-0.555556
2006-03-24	83	3.5	2.94495	0.833333
2006-03-25	84	4.5	2.94495	2.5
2006-03-26	85	5.5	2.94495	3.88889
2006-03-27	86	6	2.83168	4.44444
2006-03-28	87	6.5	2.76089	5.83333
2006-03-29	88	7.5	2.66461	5.55556
2006-03-30	89	8.5	2.55418	8.33333
2006-03-31	90	10	2.50321	15.2778
2006-04-01	91	10.5	3.25643	10.8333
2006-04-02	92	9.5	3.00158	5.55556
2006-04-03	93	10	3.25643	13.0556
2006-04-04	94	9	4.27584	2.5
2006-04-05	95	6.5	3.31307	-0.277778
2006-04-06	96	6.5	2.97326	5.55556
2006-04-07	97	7	3.62455	5
2006-04-08	98	7	4.61564	0.833333
2006-04-09	99	7.5	3.59623	3.33333
2006-04-10	100	8.5	3.0299	7.5
2006-04-11	101	10.5	2.79204	12.7778
2006-04-12	102	11	2.71841	14.7222
2006-04-13	103	12.5	2.88831	15
2006-04-14	104	12	2.40126	12.5
2006-04-15	105	13	2.23136	12.2222
2006-04-16	106	12	2.09261	8.05556
2006-04-17	107	11.5	2.02465	8.33333
2006-04-18	108	12	2.16907	11.1111
2006-04-19	109	13	2.20871	11.9444
2006-04-20	110	14	2.15208	13.0556
2006-04-21	111	14	2.16907	15.2778
2006-04-22	112	13	5.15366	10.5556
2006-04-23	113	11.5	6.3996	11.6667
2006-04-24	114	11	6.28633	9.44444
2006-04-25	115	10.5	4.70059	5.55556
2006-04-26	116	10.5	3.73782	6.38889
2006-04-27	117	11.5	3.22812	9.16667
2006-04-28	118	11.5	3.45465	6.38889
2006-04-29	119	12	3.5396	7.22222
2006-04-30	120	12.5	2.91663	11.6667
2006-05-01	121	13.5	2.65328	13.8889
2006-05-02	122	14	2.46073	11.1111
2006-05-03	123	14.5	2.31065	13.8889
2006-05-04	124	15	2.20588	16.9444
2006-05-05	125	15	2.13792	13.6111
2006-05-06	126	13.5	2.20588	6.94444
2006-05-07	127	12.5	2.15774	8.05556
2006-05-08	128	14	2.09544	13.6111
2006-05-09	129	15	2.0473	14.7222
2006-05-10	130	16	2.00766	16.6667
2006-05-11	131	16	2.18323	17.5
2006-05-12	132	16	4.70059	16.1111
2006-05-13	133	16	2.91663	15.2778
2006-05-14	134	16	2.41542	15.2778
2006-05-15	135	15.5	2.11526	13.6111
2006-05-16	136	14.5	2.46922	12.7778
2006-05-17	137	14.5	2.3333	15.2778
2006-05-18	138	14.5	2.29366	12.2222
2006-05-19	139	13	2.31631	11.1111
2006-05-20	140	12.5	2.35313	11.6667
2006-05-21	141	12	2.37012	8.88889
2006-05-22	142	10.5	2.25685	7.5
2006-05-23	143	11.5	2.08128	11.3889
2006-05-24	144	13.5	1.96802	13.8889
2006-05-25	145	14.5	1.86608	16.6667
2006-05-26	146	14.5	2.42675	18.6111
2006-05-27	147	15.5	2.70709	17.2222
2006-05-28	148	16.5	2.1096	19.4444
2006-05-29	149	18.5	1.88873	25.5556
2006-05-30	150	20.5	1.716	26.9444
2006-05-31	151	21.5	1.64237	26.3889
2006-06-01	152	20	1.91422	21.1111
2006-06-02	153	19	1.74148	19.7222
2006-06-03	154	17.5	3.45465	15.8333
2006-06-04	155	16.5	4.81386	16.6667
2006-06-05	156	17	3.00158	19.1667
2006-06-06	157	18	2.18039	19.4444
2006-06-07	158	18.5	1.71883	19.7222
2006-06-08	159	18	1.33089	17.7778
2006-06-09	160	17	2.5202	15.8333
2006-06-10	161	15	2.01616	13.0556
2006-06-11	162	14	1.67352	13.6111
2006-06-12	163	15.5	1.61406	15.2778
2006-06-13	164	16	1.58857	17.5
2006-06-14	165	17	1.43283	18.6111
2006-06-15	166	17.5	1.43849	18.6111
2006-06-16	167	18	1.28558	19.7222
2006-06-17	168	19.5	1.22895	25.5556
2006-06-18	169	20.5	1.15816	26.9444
2006-06-19	170	20.5	3.45465	23.6111
2006-06-20	171	20	2.29083	19.1667
2006-06-21	172	19	1.58574	18.0556
2006-06-22	173	20	1.28558	25.8333
2006-06-23	174	20.5	1.2063	21.1111
2006-06-24	175	20	1.16665	20.8333
2006-06-25	176	20	1.22612	23.6111
2006-06-26	177	19.5	1.15533	21.9444
2006-06-27	178	20	4.16257	23.0556
2006-06-28	179	20.5	3.82277	23.6111
2006-06-29	180	20	3.1998	20.8333
2006-06-30	181	19.5	3.34138	20.5556
2006-07-01	182	20	2.0558	21.9444
2006-07-02	183	21.5	1.80661	25.8333
2006-07-03	184	22	1.38752	25
2006-07-04	185	21.5	2.69859	23.0556
2006-07-05	186	20.5	1.96519	18.8889
2006-07-06	187	19.5	1.29408	18.0556
2006-07-07	188	20	1.12135	21.1111
2006-07-08	189	20	1.03073	21.1111
2006-07-09	190	20.5	1.01374	23.6111
2006-07-10	191	20	1.97085	23.8889
2006-07-11	192	20	4.41742	22.5
2006-07-12	193	21	31.998	21.9444
2006-07-13	194	22	47.5722	23.3333
2006-07-14	195	22.5	12.2329	25
2006-07-15	196	22.5	14.3849	25.8333
2006-07-16	197	23	8.26851	26.6667
2006-07-17	198	23.5	4.3891	28.0556
2006-07-18	199	23.5	3.11485	24.1667
2006-07-19	200	22	2.59948	23.3333
2006-07-20	201	22	2.49754	25.2778
2006-07-21	202	22	2.80903	25
2006-07-22	203	21	4.24752	20.8333
2006-07-23	204	20.5	3.59623	21.9444
2006-07-24	205	20.5	2.60231	21.9444
2006-07-25	206	21	2.18323	26.1111
2006-07-26	207	22	1.96235	26.3889
2006-07-27	208	22.5	1.77546	26.9444
2006-07-28	209	22.5	11.7515	25
2006-07-29	210	23	4.67227	25.8333
2006-07-30	211	22.5	3.65287	24.7222
2006-07-31	212	23	2.97326	26.3889
2006-08-01	213	24	2.55134	30
2006-08-02	214	24.5	2.16907	29.1667
2006-08-03	215	23.5	3.17148	23.8889
2006-08-04	216	22.5	7.19247	24.4444
2006-08-05	217	22	3.14316	21.9444
2006-08-06	218	21	2.34746	23.3333
2006-08-07	219	21.5	2.01616	24.1667
2006-08-08	220	21	1.98784	19.1667
2006-08-09	221	19.5	1.73016	19.4444
2006-08-10	222	19.5	1.64804	21.9444
2006-08-11	223	19	1.58574	17.2222
2006-08-12	224	18	1.47531	16.6667
2006-08-13	225	17.5	1.40734	18.3333
2006-08-14	226	17.5	1.39885	20.2778
2006-08-15	227	19	1.80378	21.6667
2006-08-16	228	19	1.44133	20
2006-08-17	229	19	1.33938	21.1111
2006-08-18	230	20	1.31107	25
2006-08-19	231	20	1.46964	23.0556
2006-08-20	232	19.5	1.56309	21.3889
2006-08-21	233	19.5	1.37336	20
2006-08-22	234	19	1.43566	21.1111
2006-08-23	235	19	1.49513	19.1667
2006-08-24	236	19	1.24028	21.3889
2006-08-25	237	18.5	1.2601	19.4444
2006-08-26	238	18	1.32239	20.5556
2006-08-27	239	18.5	1.32239	23.8889
2006-08-28	240	19	1.33655	21.6667
2006-08-29	241	18.5	2.53719	18.8889
2006-08-30	242	17.5	1.76697	15.8333
2006-08-31	243	16.5	1.50362	15.2778
2006-09-01	244	17	1.65087	16.9444
2006-09-02	245	16	5.57841	16.1111
2006-09-03	246	15.5	6.28633	15.8333
2006-09-04	247	16	2.97326	17.2222
2006-09-05	248	16.5	2.19738	18.0556
2006-09-06	249	17	1.97651	19.1667
2006-09-07	250	17	1.82927	20
2006-09-08	251	17.5	1.71883	20.8333
2006-09-09	252	17.5	1.65936	18.3333
2006-09-10	253	16.5	1.61123	13.6111
2006-09-11	254	15	1.43283	13.6111
2006-09-12	255	14.5	1.36487	16.3889
2006-09-13	256	15.5	4.72891	18.0556
2006-09-14	257	16.5	13.1956	18.0556
2006-09-15	258	17	9.00474	18.3333
2006-09-16	259	17	5.26692	19.1667
2006-09-17	260	17	3.65287	20.8333
2006-09-18	261	17.5	2.88831	23.0556
2006-09-19	262	18	2.86	18.0556
2006-09-20	263	16.5	2.46922	13.3333
2006-09-21	264	14.5	2.24835	13.3333
2006-09-22	265	13.5	2.12093	13.8889
2006-09-23	266	15	3.05821	19.7222
2006-09-24	267	16.5	2.60798	18.3333
2006-09-25	268	15.5	2.48622	13.8889
2006-09-26	269	15	2.77221	13.8889
2006-09-27	270	14.5	2.27667	16.6667
2006-09-28	271	15	3.62455	14.7222
2006-09-29	272	14	4.2192	10.8333
2006-09-30	273	12.5	3.05821	10.5556
2006-10-01	274	13	6.14475	14.1667
2006-10-02	275	13.5	4.07762	13.8889
2006-10-03	276	13.5	3.3697	17.2222
2006-10-04	277	14.5	4.72891	16.1111
2006-10-05	278	13.5	4.67227	9.72222
2006-10-06	279	12	2.83168	9.72222
2006-10-07	280	11.5	2.46922	10
2006-10-08	281	12	2.29083	14.4444
2006-10-09	282	13	2.21437	17.5
2006-10-10	283	13.5	2.18606	13.0556
2006-10-11	284	13.5	2.55984	15.8333
2006-10-12	285	13.5	3.11485	9.44444
2006-10-13	286	11	2.76938	6.11111
2006-10-14	287	10.5	2.5117	6.94444
2006-10-15	288	10	2.35596	6.66667
2006-10-16	289	10.5	3.17148	9.44444
2006-10-17	290	11.5	5.52178	13.0556
2006-10-18	291	12	5.46514	13.8889
2006-10-19	292	12.5	4.75722	14.4444
2006-10-20	293	11	15.6026	7.77778
2006-10-21	294	10	18.5475	6.94444
2006-10-22	295	10	9.11801	10.5556
2006-10-23	296	10	6.17306	6.38889
2006-10-24	297	8.5	4.95544	5
2006-10-25	298	8.5	4.50237	7.5
2006-10-26	299	8.5	3.99267	3.88889
2006-10-27	300	7.5	3.85108	3.88889
2006-10-28	301	8	17.16	7.5
2006-10-29	302	7.5	14.9513	6.38889
2006-10-30	303	7.5	7.73049	8.33333
2006-10-31	304	8.5	5.49346	14.4444
2006-11-01	305	9.5	4.47405	7.77778
2006-11-02	306	8	3.93604	3.05556
2006-11-03	307	6.5	3.51128	2.77778
2006-11-04	308	6	3.22812	1.66667
2006-11-05	309	6.5	3.08653	7.22222
2006-11-06	310	7.5	2.94495	10.2778
2006-11-07	311	8	2.54002	9.44444
2006-11-08	312	9.5	2.75239	12.5
2006-11-09	313	10.5	3.05821	13.6111
2006-11-10	314	10	2.97326	7.77778
2006-11-11	315	9	3.17148	10.2778
2006-11-12	316	8.5	5.32356	4.44444
2006-11-13	317	8	4.47405	6.94444
2006-11-14	318	8.5	6.31465	7.5
2006-11-15	319	9	5.26692	9.72222
2006-11-16	320	10.5	11.5816	14.1667
2006-11-17	321	10.5	29.1663	8.88889
2006-11-18	322	9	17.2449	5.55556
2006-11-19	323	8	8.94811	3.61111
2006-11-20	324	7	6.85267	1.66667
2006-11-21	325	6	6.00316	1.66667
2006-11-22	326	5.5	5.01207	1.94444
2006-11-23	327	5	4.30415	2.77778
2006-11-24	328	4.5	3.85108	4.16667
2006-11-25	329	5	3.56792	8.05556
2006-11-26	330	6	3.39802	11.6667
2006-11-27	331	7.5	3.22812	12.7778
2006-11-28	332	9	3.08653	10.8333
2006-11-29	333	9.5	2.63629	14.1667
2006-11-30	334	10.5	2.54285	14.1667
2006-12-01	335	9	28.3168	6.94444
2006-12-02	336	6.5	31.998	1.94444
2006-12-03	337	5.5	11.978	1.66667
2006-12-04	338	4.5	7.7588	-1.38889
2006-12-05	339	3.5	6.17306	-2.5
2006-12-06	340	4	4.95544	3.61111
2006-12-07	341	4	4.44574	-1.66667
2006-12-08	342	2	3.85108	-6.11111
2006-12-09	343	2.5	3.51128	0.833333
2006-12-10	344	3.5	3.42633	5.83333
2006-12-11	345	4.5	3.39802	6.94444
2006-12-12	346	5.5	3.31307	9.72222
2006-12-13	347	6.5	3.34138	9.44444
2006-12-14	348	6.5	2.88831	8.61111
2006-12-15	349	6.5	2.67877	10
2006-12-16	350	6.5	2.65045	4.16667
2006-12-17	351	6.5	2.67027	9.72222
2006-12-18	352	7	2.78071	6.38889
2006-12-19	353	6	2.71275	1.66667
2006-12-20	354	5	2.63913	3.61111
2006-12-21	355	5.5	2.62497	4.72222
2006-12-22	356	5.5	3.42633	5
2006-12-23	357	6.5	9.03306	8.61111
2006-12-24	358	6	6.03148	4.72222
2006-12-25	359	5	4.70059	4.44444
2006-12-26	360	5	14.4133	2.77778
2006-12-27	361	4.5	11.0152	1.38889
2006-12-28	362	4	6.88098	3.05556
2006-12-29	363	4	5.21029	1.11111
2006-12-30	364	4	4.50237	0
2006-12-31	365	4	4.24752	4.44444
2007-01-01	1	5.5	4.89881	7.77778
2007-01-02	2	5	5.09702	3.61111
2007-01-03	3	4.5	4.61564	6.11111
2007-01-04	4	5	4.61564	10.2778
2007-01-05	5	6.5	5.77663	12.7778
2007-01-06	6	8	19.0855	9.44444
2007-01-07	7	7	13.5637	5.27778
2007-01-08	8	6.5	10.5055	5.27778
2007-01-09	9	5	8.66494	0.833333
2007-01-10	10	3.5	6.54118	-3.88889
2007-01-11	11	3	5.52178	-0.277778
2007-01-12	12	4	6.08811	6.94444
2007-01-13	13	5	9.03306	5
2007-01-14	14	4	9.23128	-0.277778
2007-01-15	15	3	17.783	-0.277778
2007-01-16	16	2	17.613	-6.11111
2007-01-17	17	1.5	9.25959	-7.5
2007-01-18	18	1.5	6.79603	-5
2007-01-19	19	2	6.51286	-1.38889
2007-01-20	20	2	6.00316	-7.5
2007-01-21	21	1.5	5.09702	-10
2007-01-22	22	2	4.95544	-5
2007-01-23	23	2	4.84217	-3.88889
2007-01-24	24	2.5	4.67227	-4.16667
2007-01-25	25	1.5	4.58732	-9.72222
2007-01-26	26	1	4.13425	-13.0556
2007-01-27	27	1.5	4.53069	-3.88889
2007-01-28	28	1.5	4.41742	-4.16667
2007-01-29	29	1	4.27584	-8.33333
2007-01-30	30	1	3.96435	-6.66667
2007-01-31	31	1	3.68118	-6.66667
2007-02-01	32	1.5	3.68118	-3.05556
2007-02-02	33	2	3.39802	-3.33333
2007-02-03	34	1	3.11485	-9.16667
2007-02-04	35	0.5	2.97326	-13.3333
2007-02-05	36	0.5	2.88831	-13.3333
2007-02-06	37	0.5	2.77505	-11.3889
2007-02-07	38	0.5	2.71841	-10.8333
2007-02-08	39	0.5	2.63346	-7.5
2007-02-09	40	0.5	2.54851	-6.66667
2007-02-10	41	1	2.49188	-6.38889
2007-02-11	42	1	2.40693	-7.22222
2007-02-12	43	1	2.32198	-6.66667
2007-02-13	44	0.5	2.26534	-11.9444
2007-02-14	45	0.5	2.20871	-9.72222
2007-02-15	46	0.5	2.15208	-13.0556
2007-02-16	47	0.5	2.09544	-7.77778
2007-02-17	48	0.5	2.03881	-5.83333
2007-02-18	49	0.5	1.98218	-8.33333
2007-02-19	50	0.5	2.26534	-6.66667
2007-02-20	51	1.5	3.11485	4.16667
2007-02-21	52	2	3.8794	0.555556
2007-02-22	53	1.5	4.2192	-0.555556
2007-02-23	54	1	4.50237	-5.83333
2007-02-24	55	1	3.96435	-8.05556
2007-02-25	56	1	3.96435	-6.11111
2007-02-26	57	1.5	4.07762	-0.555556
2007-02-27	58	2	4.10594	-1.11111
2007-02-28	59	2	4.07762	-2.77778
2007-03-01	60	1.5	3.99267	-2.77778
2007-03-02	61	2	8.32514	3.33333
2007-03-03	62	1.5	10.0808	0.833333
2007-03-04	63	1.5	8.89148	-1.66667
2007-03-05	64	1	7.22078	-7.22222
2007-03-06	65	0.5	5.77663	-15
2007-03-07	66	0.5	4.89881	-10.2778
2007-03-08	67	0.5	4.53069	-8.61111
2007-03-09	68	1	4.24752	-4.16667
2007-03-10	69	2	4.53069	6.38889
2007-03-11	70	2.5	6.76772	1.38889
2007-03-12	71	2	9.06138	4.16667
2007-03-13	72	3	17.8962	12.5
2007-03-14	73	3	41.9089	12.2222
2007-03-15	74	3.5	41.0594	2.22222
2007-03-16	75	2.5	17.3016	-4.16667
2007-03-17	76	1.5	9.71266	-3.33333
2007-03-18	77	2	8.26851	-1.66667
2007-03-19	78	2	7.30573	-1.66667
2007-03-20	79	2.5	6.99425	-1.94444
2007-03-21	80	3	7.10752	0.555556
2007-03-22	81	4.5	11.0719	12.2222
2007-03-23	82	5.5	12.0346	6.38889
2007-03-24	83	5.5	11.44	4.16667
2007-03-25	84	5.5	14.5265	6.11111
2007-03-26	85	6.5	15.2344	14.1667
2007-03-27	86	9	18.4909	14.4444
2007-03-28	87	9	11.7232	5
2007-03-29	88	8	8.07029	3.88889
2007-03-30	89	7.5	6.65445	5.27778
2007-03-31	90	7	5.91821	4.44444
2007-04-01	91	7.5	6.51286	8.05556
2007-04-02	92	8	7.27742	10.8333
2007-04-03	93	8.5	6.11643	8.05556
2007-04-04	94	9	6.37128	5.83333
2007-04-05	95	6.5	5.97484	-2.22222
2007-04-06	96	5	5.38019	-3.61111
2007-04-07	97	4.5	4.92712	-3.33333
2007-04-08	98	4	4.70059	-1.66667
2007-04-09	99	4	4.53069	1.11111
2007-04-10	100	5	4.33247	1.94444
2007-04-11	101	5.5	4.2192	3.88889
2007-04-12	102	6.5	8.55167	7.77778
2007-04-13	103	6	7.73049	3.61111
2007-04-14	104	6	6.0598	4.44444
2007-04-15	105	6	7.05088	2.22222
2007-04-16	106	4	32.2812	2.5
2007-04-17	107	3.5	61.1643	4.16667
2007-04-18	108	5.5	35.9623	7.22222
2007-04-19	109	7.5	15.7441	8.33333
2007-04-20	110	9.5	10.4489	10.2778
2007-04-21	111	10.5	8.18356	13.6111
2007-04-22	112	12	6.79603	16.1111
2007-04-23	113	13.5	6.0598	19.4444
2007-04-24	114	13.5	8.46672	10.8333
2007-04-25	115	11.5	7.0792	7.5
2007-04-26	116	10.5	6.62613	9.72222
2007-04-27	117	12	6.34296	16.1111
2007-04-28	118	12.5	6.59781	10
2007-04-29	119	13	5.40851	13.6111
2007-04-30	120	14.5	4.64396	12.7778
2007-05-01	121	12.5	4.02099	9.44444
2007-05-02	122	12.5	3.82277	11.1111
2007-05-03	123	13	3.5396	10.5556
2007-05-04	124	13	3.28475	10.5556
2007-05-05	125	13.5	3.11485	10.8333
2007-05-06	126	13	2.94495	9.72222
2007-05-07	127	13	2.83168	11.6667
2007-05-08	128	14.5	2.72691	18.8889
2007-05-09	129	16.5	2.66178	21.9444
2007-05-10	130	16.5	2.68726	19.1667
2007-05-11	131	17	2.74107	18.3333
2007-05-12	132	15.5	2.63346	9.72222
2007-05-13	133	14	2.47772	9.16667
2007-05-14	134	14	2.36162	13.3333
2007-05-15	135	15.5	2.27384	22.2222
2007-05-16	136	15.5	3.08653	12.7778
2007-05-17	137	14	2.70142	9.72222
2007-05-18	138	13	2.16907	8.61111
2007-05-19	139	13.5	2.03881	13.0556
2007-05-20	140	13.5	1.92271	11.6667
2007-05-21	141	13.5	1.94253	10.5556
2007-05-22	142	13.5	1.98784	13.6111
2007-05-23	143	15.5	2.05014	19.7222
2007-05-24	144	18	2.88831	24.7222
2007-05-25	145	19.5	3.00158	24.4444
2007-05-26	146	19	2.47489	18.8889
2007-05-27	147	17.5	2.27667	21.6667
2007-05-28	148	17.5	2.21437	17.2222
2007-05-29	149	17	1.9482	15.5556
2007-05-30	150	17.5	1.92271	20.8333
2007-05-31	151	18.5	1.88307	24.7222
2007-06-01	152	18.5	1.89723	23.6111
2007-06-02	153	19	1.85475	25.2778
2007-06-03	154	19.5	2.33047	23.8889
2007-06-04	155	18.5	5.26692	20.2778
2007-06-05	156	17.5	3.25643	14.1667
2007-06-06	157	14.5	2.53152	11.1111
2007-06-07	158	15	2.1634	18.3333
2007-06-08	159	18	2.43808	25
2007-06-09	160	19	3.73782	17.2222
2007-06-10	161	18	2.27667	17.7778
2007-06-11	162	18	1.99633	19.4444
2007-06-12	163	19	1.93687	22.7778
2007-06-13	164	19	2.12942	22.7778
2007-06-14	165	19.5	1.91988	20.8333
2007-06-15	166	19	1.74431	20
2007-06-16	167	19.5	1.62822	21.9444
2007-06-17	168	19.5	1.56309	23.3333
2007-06-18	169	20	1.45832	23.6111
2007-06-19	170	20.5	2.55701	24.7222
2007-06-20	171	19.5	2.97326	17.7778
2007-06-21	172	18.5	2.04164	20
2007-06-22	173	18	1.86041	16.9444
2007-06-23	174	17	1.6622	14.7222
2007-06-24	175	18	1.57158	21.1111
2007-06-25	176	19.5	1.49796	23.6111
2007-06-26	177	20.5	1.43566	26.1111
2007-06-27	178	22	1.37336	28.3333
2007-06-28	179	22	1.34788	23.8889
2007-06-29	180	20.5	1.30257	18.8889
2007-06-30	181	19	1.2601	17.7778
2007-07-01	182	18.5	1.24877	15.5556
2007-07-02	183	18	1.22612	16.6667
2007-07-03	184	18	1.2063	18.8889
2007-07-04	185	17.5	1.30257	17.2222
2007-07-05	186	18	1.76414	21.6667
2007-07-06	187	19	1.7075	21.9444
2007-07-07	188	19.5	1.44982	22.2222
2007-07-08	189	19.5	1.33655	23.3333
2007-07-09	190	21.5	1.33655	29.1667
2007-07-10	191	22.5	1.31956	28.3333
2007-07-11	192	22	2.25685	22.2222
2007-07-12	193	20	1.86608	18.8889
2007-07-13	194	19	1.71033	18.6111
2007-07-14	195	18	1.52061	18.3333
2007-07-15	196	18.5	1.58574	19.7222
2007-07-16	197	18.5	1.77263	18.6111
2007-07-17	198	19	1.4215	20.2778
2007-07-18	199	19.5	1.58008	22.5
2007-07-19	200	19.5	1.63671	21.6667
2007-07-20	201	19.5	5.94653	18.6111
2007-07-21	202	19	2.50887	18.0556
2007-07-22	203	19	1.8321	19.1667
2007-07-23	204	18.5	1.6622	19.1667
2007-07-24	205	18.5	1.90006	20
2007-07-25	206	19.5	1.62538	21.9444
2007-07-26	207	20	1.55459	23.8889
2007-07-27	208	20.5	2.29932	22.5
2007-07-28	209	20.5	2.27384	22.7778
2007-07-29	210	21	1.74148	21.9444
2007-07-30	211	20.5	1.51212	21.6667
2007-07-31	212	20.5	1.41584	23.6111
2007-08-01	213	21.5	1.41584	25.2778
2007-08-02	214	22	1.39602	27.2222
2007-08-03	215	22.5	1.40734	26.6667
2007-08-04	216	22	1.35921	21.1111
2007-08-05	217	20.5	1.31107	21.3889
2007-08-06	218	21.5	1.35637	25.8333
2007-08-07	219	21.5	1.82077	23.3333
2007-08-08	220	22	1.81794	26.3889
2007-08-09	221	21	1.40168	23.3333
2007-08-10	222	20.5	1.54043	22.7778
2007-08-11	223	21	1.42434	22.2222
2007-08-12	224	20.5	1.36204	23.6111
2007-08-13	225	21	1.37053	20.5556
2007-08-14	226	19.5	1.3139	19.1667
2007-08-15	227	20	1.3054	22.2222
2007-08-16	228	20	1.31673	24.4444
2007-08-17	229	19.5	1.33655	19.1667
2007-08-18	230	18	1.36204	15.8333
2007-08-19	231	17.5	1.37903	17.5
2007-08-20	232	16.5	1.33655	16.1111
2007-08-21	233	16.5	1.49513	17.2222
2007-08-22	234	17	1.60839	20.2778
2007-08-23	235	18	1.69334	23.6111
2007-08-24	236	20	1.74715	28.0556
2007-08-25	237	21	2.01332	25.5556
2007-08-26	238	20.5	1.48663	20
2007-08-27	239	19.5	1.39319	19.7222
2007-08-28	240	19.5	1.35637	22.2222
2007-08-29	241	20	1.32239	25.8333
2007-08-30	242	20	1.31956	19.1667
2007-08-31	243	18.5	1.39035	17.7778
2007-09-01	244	18	1.34788	15.8333
2007-09-02	245	17	1.27992	16.9444
2007-09-03	246	17.5	1.23178	20.8333
2007-09-04	247	17.5	1.2063	17.7778
2007-09-05	248	17.5	1.2601	20.8333
2007-09-06	249	19	1.2516	25.8333
2007-09-07	250	20.5	1.21196	28.3333
2007-09-08	251	21	1.43	22.7778
2007-09-09	252	19.5	2.28233	18.6111
2007-09-10	253	19	1.94536	19.1667
2007-09-11	254	18	2.01332	16.6667
2007-09-12	255	17	1.95103	15.2778
2007-09-13	256	16	1.45548	16.1111
2007-09-14	257	17	1.38752	20
2007-09-15	258	16	1.46964	10
2007-09-16	259	14.5	1.4215	10.5556
2007-09-17	260	14	1.35637	13.0556
2007-09-18	261	14	1.32806	15.2778
2007-09-19	262	15	1.32239	18.8889
2007-09-20	263	16	1.29125	19.1667
2007-09-21	264	17	1.22329	21.3889
2007-09-22	265	17.5	1.19214	19.7222
2007-09-23	266	16.5	1.18931	15.5556
2007-09-24	267	15.5	1.22329	18.3333
2007-09-25	268	16.5	1.19497	22.7778
2007-09-26	269	18.5	1.144	22.5
2007-09-27	270	18.5	2.62497	16.3889
2007-09-28	271	17	2.71275	15.8333
2007-09-29	272	16	1.64237	14.1667
2007-09-30	273	15	1.3762	16.1111
2007-10-01	274	15.5	1.30257	18.0556
2007-10-02	275	15.5	1.33089	16.9444
2007-10-03	276	16	1.26576	20.8333
2007-10-04	277	16.5	1.23178	18.3333
2007-10-05	278	16.5	1.27142	21.6667
2007-10-06	279	17	1.41584	22.7778
2007-10-07	280	18	3.05821	17.2222
2007-10-08	281	17.5	1.78679	21.9444
2007-10-09	282	18.5	1.96235	18.6111
2007-10-10	283	16.5	1.44416	14.4444
2007-10-11	284	14.5	1.28275	10.8333
2007-10-12	285	13.5	1.35637	7.5
2007-10-13	286	12	1.27426	8.61111
2007-10-14	287	12	1.29125	10
2007-10-15	288	12.5	1.22895	11.3889
2007-10-16	289	12.5	1.2063	11.6667
2007-10-17	290	13	1.35354	16.9444
2007-10-18	291	14	1.15816	17.2222
2007-10-19	292	15	1.04206	19.1667
2007-10-20	293	15	1.15249	13.6111
2007-10-21	294	14	1.11851	18.0556
2007-10-22	295	14.5	1.05055	20.5556
2007-10-23	296	15	4.50237	14.1667
2007-10-24	297	14	3.48297	10.5556
2007-10-25	298	13	2.44374	9.16667
2007-10-26	299	12.5	1.83776	11.3889
2007-10-27	300	13.5	1.79245	13.0556
2007-10-28	301	12	1.97651	4.72222
2007-10-29	302	11.5	2.44657	5.55556
2007-10-30	303	12	2.63346	10
2007-10-31	304	11.5	2.01332	11.9444
2007-11-01	305	11.5	1.69334	9.44444
2007-11-02	306	10	1.52061	6.11111
2007-11-03	307	9	1.43283	5.55556
2007-11-04	308	9	1.37903	6.38889
2007-11-05	309	8	1.3762	5.83333
2007-11-06	310	8.5	2.00483	3.88889
2007-11-07	311	7.5	2.12376	2.5
2007-11-08	312	6.5	1.74715	1.94444
2007-11-09	313	6.5	1.59424	3.61111
2007-11-10	314	7	1.54043	1.38889
2007-11-11	315	6	1.46681	2.5
2007-11-12	316	7	1.44416	8.33333
2007-11-13	317	8.5	1.43849	7.77778
2007-11-14	318	8.5	1.40451	9.72222
2007-11-15	319	9	3.56792	7.5
2007-11-16	320	7.5	2.50887	2.5
2007-11-17	321	6.5	1.8774	1.11111
2007-11-18	322	5.5	1.52061	0.555556
2007-11-19	323	5	1.46964	2.5
2007-11-20	324	7	3.85108	8.05556
2007-11-21	325	7.5	5.55009	5.83333
2007-11-22	326	6.5	18.5475	1.11111
2007-11-23	327	5	9.06138	-4.72222
2007-11-24	328	3.5	6.2297	-3.61111
2007-11-25	329	4	5.38019	2.77778
2007-11-26	330	5	5.66336	3.61111
2007-11-27	331	5.5	10.0241	2.5
2007-11-28	332	4.5	6.71108	1.11111
2007-11-29	333	4.5	4.72891	2.77778
2007-11-30	334	3.5	3.90772	0.277778
2007-12-01	335	2.5	3.45465	-5.83333
2007-12-02	336	1.5	3.22812	-3.05556
2007-12-03	337	2.5	10.3073	1.11111
2007-12-04	338	1	8.66494	-3.88889
2007-12-05	339	1	6.08811	-8.33333
2007-12-06	340	1	4.70059	-7.77778
2007-12-07	341	1.5	4.30415	-2.77778
2007-12-08	342	3	3.93604	-1.66667
2007-12-09	343	2.5	3.76613	-2.22222
2007-12-10	344	2.5	3.59623	-1.11111
2007-12-11	345	3.5	4.2192	1.11111
2007-12-12	346	3.5	10.7604	1.38889
2007-12-13	347	2	9.11801	0
2007-12-14	348	2.5	6.5695	-1.66667
2007-12-15	349	1.5	5.23861	-7.5
2007-12-16	350	0	4.41742	-5.55556
2007-12-17	351	0.5	4.19089	-5.55556
2007-12-18	352	1.5	4.0493	-3.33333
2007-12-19	353	1	3.8794	-2.77778
2007-12-20	354	2.5	3.93604	-0.833333
2007-12-21	355	2	3.90772	-1.94444
2007-12-22	356	2	3.85108	2.5
2007-12-23	357	3	12.4311	5.27778
2007-12-24	358	1.5	23.6162	-0.833333
2007-12-25	359	1.5	14.4133	-1.11111
2007-12-26	360	2	7.9287	-1.11111
2007-12-27	361	2.5	6.65445	2.22222
2007-12-28	362	3	6.42791	3.05556
2007-12-29	363	3.5	7.27742	4.44444
2007-12-30	364	3.5	6.7394	1.11111
2007-12-31	365	3	6.0598	0
2008-01-01	1	3	5.83326	-0.277778
2008-01-02	2	1.5	5.60673	-6.94444
2008-01-03	3	0.5	4.47405	-10
2008-01-04	4	1	4.27584	-3.88889
2008-01-05	5	1.5	4.10594	0
2008-01-06	6	3	4.75722	7.77778
2008-01-07	7	5	6.3996	13.8889
2008-01-08	8	6.5	6.5695	16.1111
2008-01-09	9	7.5	6.54118	9.72222
2008-01-10	10	5.5	5.66336	1.94444
2008-01-11	11	5	9.99583	6.11111
2008-01-12	12	5	8.38177	2.77778
2008-01-13	13	4.5	6.28633	1.11111
2008-01-14	14	4.5	5.66336	1.38889
2008-01-15	15	3.5	5.32356	-1.66667
2008-01-16	16	3	4.84217	-1.38889
2008-01-17	17	3	4.47405	0
2008-01-18	18	3	4.53069	0
2008-01-19	19	2	4.13425	-6.11111
2008-01-20	20	0.5	3.28475	-10.5556
2008-01-21	21	0	3.1998	-8.88889
2008-01-22	22	0.5	3.11485	-3.05556
2008-01-23	23	0.5	2.97326	-6.94444
2008-01-24	24	0.5	2.86	-7.5
2008-01-25	25	0.5	2.79204	-6.38889
2008-01-26	26	1	2.75239	-5.55556
2008-01-27	27	1.5	2.74673	-5
2008-01-28	28	2	2.75522	-1.94444
2008-01-29	29	2.5	2.88831	3.05556
2008-01-30	30	2.5	3.3697	2.22222
2008-01-31	31	1	2.86	-6.94444
2008-02-01	32	1	3.51128	-1.11111
2008-02-02	33	1.5	5.09702	0.277778
2008-02-03	34	2.5	4.36079	0.555556
2008-02-04	35	3	3.93604	1.94444
2008-02-05	36	2.5	18.1228	6.38889
2008-02-06	37	1.5	43.891	0.277778
2008-02-07	38	1	28.8831	-3.05556
2008-02-08	39	1.5	12.0346	-1.38889
2008-02-09	40	2.5	8.35346	1.66667
2008-02-10	41	2	6.2297	-7.5
2008-02-11	42	0	5.66336	-11.3889
2008-02-12	43	0	5.09702	-7.5
2008-02-13	44	1	4.64396	-3.61111
2008-02-14	45	1.5	4.30415	-2.77778
2008-02-15	46	2	4.10594	-2.5
2008-02-16	47	1.5	3.82277	-6.38889
2008-02-17	48	1.5	4.0493	0
2008-02-18	49	2	14.0734	5.55556
2008-02-19	50	1	8.49504	-3.88889
2008-02-20	51	0.5	5.66336	-7.5
2008-02-21	52	1	4.50237	-7.22222
2008-02-22	53	1	4.10594	-3.33333
2008-02-23	54	2	3.85108	-3.88889
2008-02-24	55	2	3.65287	-2.77778
2008-02-25	56	2.5	3.65287	-0.833333
2008-02-26	57	2.5	3.90772	-1.38889
2008-02-27	58	1	3.90772	-7.22222
2008-02-28	59	0	3.11485	-13.3333
2008-02-29	60	0	2.6901	-8.88889
2008-03-01	61	1	3.25643	-0.833333
2008-03-02	62	2	3.39802	-3.33333
2008-03-03	63	3.5	8.66494	8.88889
2008-03-04	64	2	15.9424	1.94444
2008-03-05	65	1.5	9.96751	-1.66667
2008-03-06	66	2	7.67385	-0.277778
2008-03-07	67	2	8.26851	0
2008-03-08	68	1	6.9093	-3.61111
2008-03-09	69	1	5.83326	-6.38889
2008-03-10	70	1	5.38019	-6.66667
2008-03-11	71	2	5.09702	-3.33333
2008-03-12	72	2.5	5.09702	-2.5
2008-03-13	73	2	5.01207	-1.11111
2008-03-14	74	3.5	6.00316	5
2008-03-15	75	3.5	9.88256	2.5
2008-03-16	76	2.5	11.5249	-0.277778
2008-03-17	77	2.5	8.77821	-2.5
2008-03-18	78	3	8.55167	1.38889
2008-03-19	79	3	18.0378	4.16667
2008-03-20	80	2	28.8831	0.277778
2008-03-21	81	2	17.698	-1.38889
2008-03-22	82	3	11.44	-2.77778
2008-03-23	83	3	8.83484	-3.05556
2008-03-24	84	3	7.419	-2.22222
2008-03-25	85	3	6.25801	-0.277778
2008-03-26	86	5	6.7394	3.33333
2008-03-27	87	5	7.419	3.33333
2008-03-28	88	4	8.49504	-0.833333
2008-03-29	89	4	7.81544	-3.88889
2008-03-30	90	4	6.79603	-0.277778
2008-03-31	91	5	13.9319	7.77778
2008-04-01	92	6.5	16.9618	9.72222
2008-04-02	93	6.5	11.3834	0.833333
2008-04-03	94	6	7.7588	4.72222
2008-04-04	95	7	6.7394	5
2008-04-05	96	7.5	6.51286	6.94444
2008-04-06	97	8.5	5.74831	9.16667
2008-04-07	98	10	5.12534	11.1111
2008-04-08	99	11	4.72891	14.1667
2008-04-09	100	11.5	4.44574	14.1667
2008-04-10	101	11	4.19089	7.77778
2008-04-11	102	10	6.93762	10.2778
2008-04-12	103	9	12.601	7.5
2008-04-13	104	9	9.74098	4.16667
2008-04-14	105	9.5	7.02257	6.66667
2008-04-15	106	10	5.52178	5.83333
2008-04-16	107	10.5	4.72891	11.1111
2008-04-17	108	12	4.33247	15.5556
2008-04-18	109	13.5	4.07762	17.2222
2008-04-19	110	15	3.93604	19.7222
2008-04-20	111	16	3.90772	21.3889
2008-04-21	112	16.5	3.73782	18.6111
2008-04-22	113	16.5	3.56792	17.5
2008-04-23	114	16	3.56792	16.6667
2008-04-24	115	15.5	3.34138	12.5
2008-04-25	116	14.5	2.97326	14.4444
2008-04-26	117	15.5	3.90772	20
2008-04-27	118	16	4.27584	13.8889
2008-04-28	119	14	4.67227	9.72222
2008-04-29	120	12	4.27584	6.11111
2008-04-30	121	11	3.56792	5.27778
2008-05-01	122	11	3.28475	7.5
2008-05-02	123	12	3.22812	13.6111
2008-05-03	124	13.5	4.2192	17.7778
2008-05-04	125	13.5	6.62613	9.44444
2008-05-05	126	13.5	4.41742	11.9444
2008-05-06	127	14	3.48297	13.3333
2008-05-07	128	14	3.45465	15.5556
2008-05-08	129	14	4.50237	10.8333
2008-05-09	130	13	3.51128	9.44444
2008-05-10	131	13.5	3.11485	12.5
2008-05-11	132	13.5	2.86	12.5
2008-05-12	133	14	2.7354	13.8889
2008-05-13	134	14.5	2.69859	13.3333
2008-05-14	135	14.5	2.6193	15.2778
2008-05-15	136	15	2.63913	13.0556
2008-05-16	137	13.5	2.88831	11.1111
2008-05-17	138	13	2.67594	12.7778
2008-05-18	139	12.5	2.59099	9.16667
2008-05-19	140	11	2.7439	7.77778
2008-05-20	141	11	2.43241	10.5556
2008-05-21	142	11	2.27384	8.33333
2008-05-22	143	11	2.21721	10.5556
2008-05-23	144	12	2.19738	12.2222
2008-05-24	145	13.5	2.07279	13.3333
2008-05-25	146	14.5	1.9935	14.4444
2008-05-26	147	15.5	1.9397	19.4444
2008-05-27	148	15.5	1.96802	14.1667
2008-05-28	149	14	1.89723	9.44444
2008-05-29	150	14	1.87174	13.3333
2008-05-30	151	14.5	1.85758	15.2778
2008-05-31	152	16	2.1634	20.5556
2008-06-01	153	16	2.19455	14.7222
2008-06-02	154	16	2.00766	17.5
2008-06-03	155	16.5	1.92554	17.5
2008-06-04	156	16	1.88307	18.3333
2008-06-05	157	17.5	1.89723	22.2222
2008-06-06	158	20	1.99633	27.7778
2008-06-07	159	21.5	1.85475	26.6667
2008-06-08	160	22	1.75847	26.1111
2008-06-09	161	23	1.73299	27.5
2008-06-10	162	22.5	2.13509	24.1667
2008-06-11	163	21	2.46639	21.6667
2008-06-12	164	20	1.77263	19.7222
2008-06-13	165	20	1.63388	23.8889
2008-06-14	166	20.5	2.88831	20.5556
2008-06-15	167	20.5	2.65895	21.9444
2008-06-16	168	20	3.25643	20.2778
2008-06-17	169	18.5	2.97326	15.5556
2008-06-18	170	17.5	2.2795	15.8333
2008-06-19	171	17	2.14075	15
2008-06-20	172	17.5	2.10394	18.0556
2008-06-21	173	18	2.06146	20
2008-06-22	174	18.5	2.35596	20.8333
2008-06-23	175	19	2.25119	20.2778
2008-06-24	176	19	1.99917	20
2008-06-25	177	19.5	1.7783	20.8333
2008-06-26	178	20	1.75281	23.3333
2008-06-27	179	20.5	1.65087	23.3333
2008-06-28	180	21	1.85192	23.6111
2008-06-29	181	21.5	2.37012	22.5
2008-06-30	182	20.5	3.68118	20.2778
2008-07-01	183	20.5	2.32764	20
2008-07-02	184	20	1.86608	20.8333
2008-07-03	185	20	2.23703	18.6111
2008-07-04	186	19	2.57117	17.7778
2008-07-05	187	19.5	1.91988	18.0556
2008-07-06	188	20	1.64237	21.9444
2008-07-07	189	21.5	1.53194	25.5556
2008-07-08	190	22.5	1.41018	27.5
2008-07-09	191	22.5	1.43566	22.5
2008-07-10	192	21.5	1.45832	20
2008-07-11	193	20.5	1.35354	20.5556
2008-07-12	194	21	1.36487	24.4444
2008-07-13	195	21.5	1.86325	22.2222
2008-07-14	196	20.5	2.74107	21.1111
2008-07-15	197	20.5	1.81794	20
2008-07-16	198	21	1.48946	23.8889
2008-07-17	199	22	1.80095	24.7222
2008-07-18	200	22.5	1.57441	26.3889
2008-07-19	201	23	1.37336	26.1111
2008-07-20	202	22.5	2.24269	24.7222
2008-07-21	203	22.5	3.62455	23.0556
2008-07-22	204	22	3.0299	22.2222
2008-07-23	205	21.5	6.71108	22.2222
2008-07-24	206	21	5.21029	19.1667
2008-07-25	207	20.5	4.50237	21.3889
2008-07-26	208	21	2.94495	22.7778
2008-07-27	209	21.5	2.26251	21.9444
2008-07-28	210	21.5	2.02748	22.7778
2008-07-29	211	21.5	1.9482	21.9444
2008-07-30	212	20.5	1.73582	21.9444
2008-07-31	213	21	2.43808	22.7778
2008-08-01	214	21	2.002	22.5
2008-08-02	215	21	2.04164	21.3889
2008-08-03	216	20	2.09544	20.2778
2008-08-04	217	20	1.7613	21.1111
2008-08-05	218	20.5	1.95386	22.7778
2008-08-06	219	22	5.77663	23.6111
2008-08-07	220	21.5	3.1998	20.2778
2008-08-08	221	20	4.41742	19.1667
2008-08-09	222	19.5	4.67227	19.1667
2008-08-10	223	19.5	5.80494	18.3333
2008-08-11	224	19	5.49346	18.0556
2008-08-12	225	19	3.93604	18.8889
2008-08-13	226	18.5	2.74107	19.7222
2008-08-14	227	18.5	2.56267	18.6111
2008-08-15	228	18.5	2.50887	19.1667
2008-08-16	229	18.5	2.06996	20
2008-08-17	230	19	1.89156	21.3889
2008-08-18	231	20	1.76414	23.0556
2008-08-19	232	20	2.53719	15.2778
2008-08-20	233	18	2.31065	15.5556
2008-08-21	234	18	1.94536	19.1667
2008-08-22	235	19	1.78962	22.7778
2008-08-23	236	20	1.69334	22.5
2008-08-24	237	20	1.65653	24.1667
2008-08-25	238	19.5	1.68202	15.8333
2008-08-26	239	17.5	1.58857	16.1111
2008-08-27	240	17	1.57158	16.9444
2008-08-28	241	17.5	1.57158	17.5
2008-08-29	242	17.5	1.83493	20.2778
2008-08-30	243	18.5	1.89439	20.2778
2008-08-31	244	18	1.70184	19.1667
2008-09-01	245	18	1.64521	19.7222
2008-09-02	246	18	1.58291	20.8333
2008-09-03	247	18.5	1.56309	22.2222
2008-09-04	248	19.5	1.46681	23.0556
2008-09-05	249	20	1.42717	26.6667
2008-09-06	250	19.5	1.45832	18.0556
2008-09-07	251	18	1.48663	17.2222
2008-09-08	252	17.5	1.42717	18.6111
2008-09-09	253	17.5	1.84909	14.7222
2008-09-10	254	16	1.59707	13.3333
2008-09-11	255	15	1.43	15
2008-09-12	256	16	2.25968	19.1667
2008-09-13	257	17	3.11485	22.2222
2008-09-14	258	19.5	4.47405	25.8333
2008-09-15	259	18.5	2.25968	16.6667
2008-09-16	260	16.5	1.81228	14.1667
2008-09-17	261	15.5	1.61689	16.3889
2008-09-18	262	16	1.47531	13.3333
2008-09-19	263	14.5	1.4215	13.0556
2008-09-20	264	15	1.38752	18.6111
2008-09-21	265	15	1.39035	12.2222
2008-09-22	266	14	1.46964	11.6667
2008-09-23	267	13.5	1.43283	13.3333
2008-09-24	268	14	1.39319	16.9444
2008-09-25	269	15	1.35637	17.2222
2008-09-26	270	14.5	1.35637	13.6111
2008-09-27	271	15.5	1.45265	19.1667
2008-09-28	272	16	1.85475	16.3889
2008-09-29	273	15.5	1.88024	13.3333
2008-09-30	274	15	1.63105	15.2778
2008-10-01	275	14.5	1.74148	13.0556
2008-10-02	276	13.5	2.57683	11.1111
2008-10-03	277	12.5	2.61081	9.72222
2008-10-04	278	12	1.88024	8.88889
2008-10-05	279	11.5	1.59424	10.2778
2008-10-06	280	12	1.50929	7.77778
2008-10-07	281	11	1.42717	8.33333
2008-10-08	282	11	1.48663	11.6667
2008-10-09	283	13	1.74148	16.3889
2008-10-10	284	13	1.47814	13.3333
2008-10-11	285	12.5	1.41018	13.3333
2008-10-12	286	12.5	1.39602	16.1111
2008-10-13	287	13.5	1.38186	19.1667
2008-10-14	288	13.5	1.3762	16.1111
2008-10-15	289	13	1.3677	11.9444
2008-10-16	290	14	6.45623	14.4444
2008-10-17	291	12.5	3.39802	6.38889
2008-10-18	292	10.5	2.13509	5.83333
2008-10-19	293	9.5	1.72732	5.83333
2008-10-20	294	9	1.56592	8.88889
2008-10-21	295	10	2.29366	6.94444
2008-10-22	296	9	3.96435	3.88889
2008-10-23	297	8.5	3.05821	5.27778
2008-10-24	298	8.5	2.73257	6.11111
2008-10-25	299	10	6.54118	11.1111
2008-10-26	300	10.5	5.88989	11.9444
2008-10-27	301	10	3.73782	6.94444
2008-10-28	302	9	3.28475	5
2008-10-29	303	7	3.22812	2.5
2008-10-30	304	6.5	2.68726	3.88889
2008-10-31	305	7	2.18889	11.6667
2008-11-01	306	8.5	1.96802	4.72222
2008-11-02	307	7	1.78679	2.5
2008-11-03	308	7	1.66786	9.72222
2008-11-04	309	8.5	1.61406	14.7222
2008-11-05	310	9	1.58291	14.1667
2008-11-06	311	9	1.5461	11.6667
2008-11-07	312	9.5	1.63954	11.9444
2008-11-08	313	10	1.84909	10.2778
2008-11-09	314	9	1.70467	5.83333
2008-11-10	315	7.5	1.79812	2.5
2008-11-11	316	7	1.65087	4.16667
2008-11-12	317	7	1.58857	6.38889
2008-11-13	318	7.5	1.86891	9.16667
2008-11-14	319	8.5	2.00766	13.0556
2008-11-15	320	9	3.79445	8.88889
2008-11-16	321	8.5	4.10594	3.33333
2008-11-17	322	6	3.00158	1.11111
2008-11-18	323	4.5	2.6278	-1.66667
2008-11-19	324	3.5	2.54568	-4.72222
2008-11-20	325	3.5	2.80053	-1.11111
2008-11-21	326	3	2.78071	-4.72222
2008-11-22	327	2	2.53719	-6.38889
2008-11-23	328	1.5	2.26534	-5.27778
2008-11-24	329	2	2.33614	1.66667
2008-11-25	330	3.5	4.3891	2.22222
2008-11-26	331	4	5.83326	1.38889
2008-11-27	332	3.5	6.99425	1.94444
2008-11-28	333	4	5.12534	3.88889
2008-11-29	334	4	4.50237	1.66667
2008-11-30	335	3	4.13425	-1.38889
2008-12-01	336	3.5	6.2297	4.16667
2008-12-02	337	3.5	5.66336	0.555556
2008-12-03	338	3	4.27584	1.94444
2008-12-04	339	4	3.93604	2.5
2008-12-05	340	2.5	4.0493	-3.33333
2008-12-06	341	1.5	3.68118	-3.88889
2008-12-07	342	1.5	3.48297	-5.55556
2008-12-08	343	0.5	3.11485	-6.94444
2008-12-09	344	1.5	3.25643	3.05556
2008-12-10	345	3	5.09702	3.88889
2008-12-11	346	2.5	4.75722	-2.22222
2008-12-12	347	2	4.19089	-3.61111
2008-12-13	348	1	3.56792	-5.55556
2008-12-14	349	2	3.25643	3.88889
2008-12-15	350	4	4.44574	5.55556
2008-12-16	351	3	5.09702	-4.44444
2008-12-17	352	1.5	3.73782	-0.833333
2008-12-18	353	2	3.31307	-1.11111
2008-12-19	354	1	2.88831	-4.44444
2008-12-20	355	0	2.6816	-8.88889
2008-12-21	356	0.5	2.86	-5.55556
2008-12-22	357	0	2.97326	-9.72222
2008-12-23	358	0.5	2.94495	-4.44444
2008-12-24	359	1	3.65287	4.44444
2008-12-25	360	1.5	10.3356	1.38889
2008-12-26	361	1	8.77821	-0.833333
2008-12-27	362	2.5	20.1899	9.72222
2008-12-28	363	3	43.6079	9.16667
2008-12-29	364	3	19.3121	4.16667
2008-12-30	365	3	10.1374	-0.277778
2008-12-31	366	1	7.0792	-7.5
2009-01-01	1	0.5	5.66336	-10.5556
2009-01-02	2	1	5.60673	-2.5
2009-01-03	3	1.5	5.21029	-6.94444
2009-01-04	4	0.5	4.44574	-6.66667
2009-01-05	5	1.5	4.64396	-3.33333
2009-01-06	6	1	4.0493	-6.38889
2009-01-07	7	1.5	7.67385	0.833333
2009-01-08	8	1.5	10.194	-3.05556
2009-01-09	9	1	7.44732	-8.33333
2009-01-10	10	0.5	5.43683	-10.2778
2009-01-11	11	0.5	4.81386	-6.11111
2009-01-12	12	0.5	4.3891	-6.11111
2009-01-13	13	1	3.93604	-3.88889
2009-01-14	14	0.5	3.45465	-13.0556
2009-01-15	15	0.5	3.34138	-12.2222
2009-01-16	16	0.5	3.3697	-14.4444
2009-01-17	17	0.5	3.59623	-13.0556
2009-01-18	18	0.5	3.65287	-5
2009-01-19	19	0.5	3.34138	-10.2778
2009-01-20	20	0.5	3.05821	-11.6667
2009-01-21	21	0.5	2.97326	-8.88889
2009-01-22	22	0.5	2.91663	-3.05556
2009-01-23	23	1	2.86	1.38889
2009-01-24	24	0.5	2.91663	-7.5
2009-01-25	25	0.5	2.6816	-10.2778
2009-01-26	26	0.5	2.62497	-10.2778
2009-01-27	27	0.5	2.53435	-7.77778
2009-01-28	28	0.5	2.53435	-3.33333
2009-01-29	29	0.5	2.58249	-5.83333
2009-01-30	30	0.5	2.54851	-5.83333
2009-01-31	31	0.5	2.48338	-7.5
2009-02-01	32	0.5	2.65328	1.11111
2009-02-02	33	1.5	2.75806	-2.77778
2009-02-03	34	1	2.60515	-5.27778
2009-02-04	35	0.5	2.45223	-9.72222
2009-02-05	36	0	2.37578	-13.0556
2009-02-06	37	0.5	2.37578	-6.11111
2009-02-07	38	0.5	2.86	0.555556
2009-02-08	39	1	10.8453	3.88889
2009-02-09	40	1	11.1851	0
2009-02-10	41	1.5	9.31623	5.55556
2009-02-11	42	2	12.8841	9.44444
2009-02-12	43	2.5	37.3782	6.11111
2009-02-13	44	1.5	42.4752	-1.94444
2009-02-14	45	1.5	16.2255	-3.33333
2009-02-15	46	1.5	9.74098	-2.5
2009-02-16	47	1.5	7.16415	-3.33333
2009-02-17	48	1.5	5.74831	-2.22222
2009-02-18	49	2	5.23861	0.555556
2009-02-19	50	2.5	5.12534	-1.94444
2009-02-20	51	1	4.24752	-5.55556
2009-02-21	52	1.5	3.96435	-2.5
2009-02-22	53	2.5	3.76613	-1.38889
2009-02-23	54	1.5	3.45465	-6.66667
2009-02-24	55	1	3.14316	-7.5
2009-02-25	56	1.5	3.05821	0.555556
2009-02-26	57	3.5	3.25643	5.83333
2009-02-27	58	4.5	4.36079	4.16667
2009-02-28	59	2.5	4.92712	-8.05556
2009-03-01	60	1.5	3.79445	-6.38889
2009-03-02	61	1	3.1998	-8.33333
2009-03-03	62	0.5	2.82885	-8.88889
2009-03-04	63	1	2.64196	-4.44444
2009-03-05	64	2	2.57117	2.22222
2009-03-06	65	4.5	2.97326	10.2778
2009-03-07	66	5	4.98376	3.88889
2009-03-08	67	3.5	25.0887	4.16667
2009-03-09	68	3	37.3782	3.33333
2009-03-10	69	3	18.321	2.5
2009-03-11	70	4.5	25.3435	5.27778
2009-03-12	71	4	18.0378	-4.16667
2009-03-13	72	3	9.74098	-2.77778
2009-03-14	73	3.5	7.30573	1.38889
2009-03-15	74	4.5	6.17306	3.61111
2009-03-16	75	5.5	5.40851	4.44444
2009-03-17	76	6.5	4.98376	6.94444
2009-03-18	77	7.5	4.70059	9.44444
2009-03-19	78	8	4.67227	2.5
2009-03-20	79	6.5	4.559	-2.5
2009-03-21	80	5.5	4.10594	0
2009-03-22	81	6	3.65287	1.11111
2009-03-23	82	5	3.39802	-3.88889
2009-03-24	83	4.5	3.14316	-1.66667
2009-03-25	84	5.5	3.05821	7.5
2009-03-26	85	7.5	3.0299	9.16667
2009-03-27	86	8.5	3.73782	6.94444
2009-03-28	87	9.5	3.5396	8.05556
2009-03-29	88	10	3.34138	10.2778
2009-03-30	89	8	3.93604	2.5
2009-03-31	90	7	3.45465	3.05556
2009-04-01	91	8	3.45465	8.88889
2009-04-02	92	9	3.68118	10.5556
2009-04-03	93	10.5	5.38019	8.88889
2009-04-04	94	8	15.8857	2.5
2009-04-05	95	6.5	16.0839	6.11111
2009-04-06	96	8	11.0719	5.83333
2009-04-07	97	6.5	10.8453	-1.66667
2009-04-08	98	5.5	8.21187	2.5
2009-04-09	99	6.5	6.2297	5.55556
2009-04-10	100	8	5.01207	3.61111
2009-04-11	101	8.5	4.27584	3.88889
2009-04-12	102	8	3.79445	1.38889
2009-04-13	103	8	3.5396	1.66667
2009-04-14	104	8.5	3.3697	6.66667
2009-04-15	105	9.5	3.14316	7.5
2009-04-16	106	10	2.97326	6.11111
2009-04-17	107	10.5	2.88831	9.16667
2009-04-18	108	11.5	2.7977	12.7778
2009-04-19	109	11.5	2.74107	7.22222
2009-04-20	110	10.5	2.76938	8.33333
2009-04-21	111	10.5	3.05821	10.8333
2009-04-22	112	10.5	3.05821	6.66667
2009-04-23	113	9.5	2.94495	6.66667
2009-04-24	114	11	2.78354	14.4444
2009-04-25	115	15	2.67311	22.5
2009-04-26	116	16.5	2.78071	12.5
2009-04-27	117	16.5	2.55134	19.1667
2009-04-28	118	16	2.67877	13.0556
2009-04-29	119	13.5	3.05821	7.77778
2009-04-30	120	13	2.68443	12.2222
2009-05-01	121	14.5	2.88831	14.7222
2009-05-02	122	14.5	3.05821	9.72222
2009-05-03	123	14	2.72691	12.5
2009-05-04	124	14	2.54002	10.5556
2009-05-05	125	13	2.41542	10.5556
2009-05-06	126	14	2.38711	14.7222
2009-05-07	127	14	4.02099	13.8889
2009-05-08	128	15.5	3.51128	17.2222
2009-05-09	129	16	3.62455	15.8333
2009-05-10	130	14	3.22812	7.77778
2009-05-11	131	13	2.72408	7.22222
2009-05-12	132	13	2.46356	10
2009-05-13	133	14	2.31348	13.0556
2009-05-14	134	15	2.4579	16.9444
2009-05-15	135	15	2.31631	12.5
2009-05-16	136	15.5	2.57966	16.9444
2009-05-17	137	14.5	2.80336	7.77778
2009-05-18	138	13.5	2.33047	7.77778
2009-05-19	139	13.5	2.11526	11.9444
2009-05-20	140	15	1.9935	18.6111
2009-05-21	141	17	1.96519	21.3889
2009-05-22	142	17.5	1.88307	16.6667
2009-05-23	143	17	1.86891	16.3889
2009-05-24	144	17	1.83493	17.7778
2009-05-25	145	16	1.7783	11.9444
2009-05-26	146	14.5	1.80095	12.5
2009-05-27	147	15	2.02465	18.6111
2009-05-28	148	17	6.3996	20.5556
2009-05-29	149	18	7.95702	16.6667
2009-05-30	150	17	3.76613	15
2009-05-31	151	16	2.97326	8.88889
2009-06-01	152	14	2.43808	12.2222
2009-06-02	153	14.5	2.24835	13.8889
2009-06-03	154	14.5	2.03031	13.6111
2009-06-04	155	14.5	1.91422	11.9444
2009-06-05	156	15	1.79812	13.8889
2009-06-06	157	15.5	1.65936	17.2222
2009-06-07	158	15.5	1.53477	16.1111
2009-06-08	159	15.5	1.4838	14.1667
2009-06-09	160	17	2.21721	18.3333
2009-06-10	161	17	1.82643	15
2009-06-11	162	17	1.79245	17.5
2009-06-12	163	17.5	3.3697	18.6111
2009-06-13	164	17.5	2.12942	16.6667
2009-06-14	165	17.5	1.76697	16.9444
2009-06-15	166	17.5	1.80661	17.7778
2009-06-16	167	17.5	1.73865	17.7778
2009-06-17	168	18	3.25643	17.5
2009-06-18	169	17	12.9974	16.3889
2009-06-19	170	17	6.79603	18.0556
2009-06-20	171	17	9.20296	15.8333
2009-06-21	172	17	15.376	19.1667
2009-06-22	173	18.5	8.43841	21.1111
2009-06-23	174	19	4.559	20.2778
2009-06-24	175	19.5	3.25643	21.3889
2009-06-25	176	19.5	2.97326	23.6111
2009-06-26	177	19.5	3.28475	21.6667
2009-06-27	178	19.5	3.05821	20.8333
2009-06-28	179	19	3.42633	18.8889
2009-06-29	180	19	3.59623	19.7222
2009-06-30	181	18.5	3.99267	18.6111
2009-07-01	182	18	3.34138	18.3333
2009-07-02	183	18.5	10.4489	18.8889
2009-07-03	184	18.5	7.36237	18.8889
2009-07-04	185	18	4.36079	15.8333
2009-07-05	186	17.5	3.34138	16.6667
2009-07-06	187	18	3.1998	17.7778
2009-07-07	188	17.5	3.17148	16.6667
2009-07-08	189	17.5	3.11485	17.5
2009-07-09	190	18	3.22812	16.9444
2009-07-10	191	18.5	2.38711	20
2009-07-11	192	19	5.23861	20.5556
2009-07-12	193	18.5	4.19089	16.3889
2009-07-13	194	18	2.91663	16.1111
2009-07-14	195	17.5	2.45507	15.2778
2009-07-15	196	17.5	2.16624	17.5
2009-07-16	197	19	2.07562	21.9444
2009-07-17	198	18.5	1.97651	17.7778
2009-07-18	199	18.5	2.21437	17.7778
2009-07-19	200	18	1.90006	16.3889
2009-07-20	201	18	1.74431	18.0556
2009-07-21	202	18	2.72124	19.1667
2009-07-22	203	18.5	5.21029	20
2009-07-23	204	19.5	5.77663	22.5
2009-07-24	205	19.5	4.10594	20.5556
2009-07-25	206	19.5	4.13425	21.3889
2009-07-26	207	20.5	5.09702	21.9444
2009-07-27	208	20	2.77788	20.8333
2009-07-28	209	20.5	2.3418	23.0556
2009-07-29	210	20.5	2.39843	21.9444
2009-07-30	211	20	2.27667	20.2778
2009-07-31	212	20	2.25968	21.9444
2009-08-01	213	20	2.16624	20.8333
2009-08-02	214	20	2.70709	19.4444
2009-08-03	215	19.5	2.37012	19.4444
2009-08-04	216	20	1.94253	23.3333
2009-08-05	217	20	1.75847	18.6111
2009-08-06	218	18.5	1.60839	17.5
2009-08-07	219	18	1.49796	17.2222
2009-08-08	220	17.5	1.4923	17.2222
2009-08-09	221	18.5	1.97934	21.9444
2009-08-10	222	20	3.68118	24.7222
2009-08-11	223	20.5	2.97326	22.5
2009-08-12	224	20.5	2.03031	21.3889
2009-08-13	225	20.5	2.1181	22.5
2009-08-14	226	20.5	1.67352	22.7778
2009-08-15	227	20.5	1.49513	23.8889
2009-08-16	228	21	1.43283	25
2009-08-17	229	21	1.34788	26.3889
2009-08-18	230	21.5	1.95386	25.2778
2009-08-19	231	21.5	1.63954	22.5
2009-08-20	232	20.5	1.29408	23.8889
2009-08-21	233	21	2.30499	23.3333
2009-08-22	234	21	2.20871	22.2222
2009-08-23	235	20	1.65087	20
2009-08-24	236	19.5	1.58008	18.8889
2009-08-25	237	19	1.47814	19.1667
2009-08-26	238	18.5	1.44133	18.6111
2009-08-27	239	17.5	1.45265	16.3889
2009-08-28	240	16.5	1.38186	16.3889
2009-08-29	241	17.5	2.03881	20
2009-08-30	242	17	1.9397	16.1111
2009-08-31	243	16.5	1.66786	14.1667
2009-09-01	244	15.5	1.51212	14.7222
2009-09-02	245	16	1.37903	16.6667
2009-09-03	246	16.5	1.29408	17.7778
2009-09-04	247	16.5	1.37053	17.5
2009-09-05	248	17	1.31956	17.5
2009-09-06	249	16.5	1.25443	17.5
2009-09-07	250	16.5	1.22895	18.6111
2009-09-08	251	17.5	1.22045	20.2778
2009-09-09	252	17.5	1.30257	18.6111
2009-09-10	253	16.5	1.21762	16.6667
2009-09-11	254	16	1.22895	14.7222
2009-09-12	255	16	1.21196	16.6667
2009-09-13	256	16	1.24028	16.6667
2009-09-14	257	16	1.22895	17.2222
2009-09-15	258	16.5	1.21479	16.6667
2009-09-16	259	15.5	1.24311	14.4444
2009-09-17	260	15	1.1978	14.7222
2009-09-18	261	15	1.19214	15
2009-09-19	262	14	1.17232	10.8333
2009-09-20	263	13	1.11851	14.1667
2009-09-21	264	14.5	1.16382	18.3333
2009-09-22	265	16	1.144	20.8333
2009-09-23	266	17	1.11851	22.5
2009-09-24	267	17	1.0902	16.3889
2009-09-25	268	15.5	1.03923	10.5556
2009-09-26	269	13.5	1.11851	11.3889
2009-09-27	270	14.5	3.34138	16.1111
2009-09-28	271	14.5	2.71558	15
2009-09-29	272	14	4.19089	12.7778
2009-09-30	273	12.5	2.2342	8.05556
2009-10-01	274	11.6	1.68202	7.77778
2009-10-02	275	11.4	2.42958	9.16667
2009-10-03	276	12.4	3.08653	13.3333
2009-10-04	277	12.3	1.91988	11.1111
2009-10-05	278	12.4	1.61123	10.8333
2009-10-06	279	12.1	1.47531	10.5556
2009-10-07	280	12.4	1.97934	12.5
2009-10-08	281	12.1	1.80661	11.1111
2009-10-09	282	12.4	1.53477	11.9444
2009-10-10	283	12.3	2.76089	10
2009-10-11	284	11.1	2.0558	5
2009-10-12	285	9.4	1.68202	4.16667
2009-10-13	286	9.5	1.60556	6.66667
2009-10-14	287	9	1.59424	2.77778
2009-10-15	288	7.6	1.58291	0.833333
2009-10-16	289	7.6	1.54327	3.88889
2009-10-17	290	7.8	1.55176	5.27778
2009-10-18	291	7.8	1.59707	3.33333
2009-10-19	292	7.3	1.54043	5.55556
2009-10-20	293	9.1	1.53477	12.7778
2009-10-21	294	10.4	1.55459	13.6111
2009-10-22	295	11.1	1.58574	11.6667
2009-10-23	296	10.1	1.63388	8.33333
2009-10-24	297	11.2	2.37578	12.7778
2009-10-25	298	10.8	1.74148	8.33333
2009-10-26	299	9.9	1.56309	8.61111
2009-10-27	300	10	1.61689	13.0556
2009-10-28	301	11	7.10752	10.2778
2009-10-29	302	11.3	5.04039	9.72222
2009-10-30	303	11.5	3.22812	12.7778
2009-10-31	304	11.7	2.86	11.6667
2009-11-01	305	10.4	2.5202	5
2009-11-02	306	8.8	2.15491	5
2009-11-03	307	9.1	1.95952	5.83333
2009-11-04	308	7.8	1.8859	2.22222
2009-11-05	309	6.9	1.93404	1.66667
2009-11-06	310	6.3	1.97368	1.66667
2009-11-07	311	6.3	1.84059	7.5
2009-11-08	312	7.9	1.74148	11.6667
2009-11-09	313	8.8	1.66503	13.3333
2009-11-10	314	9.7	1.57441	9.44444
2009-11-11	315	8.4	1.53477	3.61111
2009-11-12	316	6.6	1.56592	2.22222
2009-11-13	317	5.5	1.52344	3.33333
2009-11-14	318	6.4	1.50079	6.94444
2009-11-15	319	7.5	1.50079	10
2009-11-16	320	7.9	1.46115	2.5
2009-11-17	321	6.3	1.43849	1.94444
2009-11-18	322	5.6	1.4215	5.27778
2009-11-19	323	6.3	2.29649	6.66667
2009-11-20	324	7.9	4.30415	6.94444
2009-11-21	325	7.4	3.0299	5
2009-11-22	326	7.9	2.3333	6.11111
2009-11-23	327	7	2.19455	5
2009-11-24	328	7.4	2.49188	8.05556
2009-11-25	329	8.4	2.46073	8.61111
2009-11-26	330	8.4	2.51736	8.05556
2009-11-27	331	7.6	2.56267	2.5
2009-11-28	332	6.9	2.67594	1.94444
2009-11-29	333	6.2	2.44091	4.44444
2009-11-30	334	6.6	2.58532	2.5
2009-12-01	335	5.6	2.80053	1.94444
2009-12-02	336	5.7	3.0299	6.38889
2009-12-03	337	7.3	4.47405	7.77778
2009-12-04	338	6.4	3.45465	1.38889
2009-12-05	339	4.9	2.80053	-1.94444
2009-12-06	340	3.8	2.30499	-0.555556
2009-12-07	341	3.2	2.08695	-0.833333
2009-12-08	342	3.3	1.97934	0
2009-12-09	343	3	3.76613	3.05556
2009-12-10	344	2.9	5.29524	-3.61111
2009-12-11	345	0.6	3.45465	-8.05556
2009-12-12	346	0.5	2.74673	-3.88889
2009-12-13	347	1	2.91663	-1.94444
2009-12-14	348	2.5	3.73782	2.5
2009-12-15	349	3.5	4.559	1.11111
2009-12-16	350	2.2	3.73782	-4.72222
2009-12-17	351	0.9	3.08653	-10.8333
2009-12-18	352	0.3	2.43241	-10.5556
2009-12-19	353	0.4	2.66178	-6.66667
2009-12-20	354	0.7	2.47772	-3.88889
2009-12-21	355	1.4	2.21154	-3.05556
2009-12-22	356	0.8	2.2257	-6.94444
2009-12-23	357	0.6	2.21154	-7.22222
2009-12-24	358	1.2	2.21154	-3.61111
2009-12-25	359	1.6	3.0299	-0.555556
2009-12-26	360	2.5	7.98534	4.16667
2009-12-27	361	2.6	8.60831	0.277778
2009-12-28	362	1.7	5.91821	-4.16667
2009-12-29	363	0.3	3.96435	-10.5556
2009-12-30	364	0.6	3.56792	-5.27778
2009-12-31	365	1.5	3.3697	-0.555556
2010-01-01	1	2.2	3.42633	-2.77778
2010-01-02	2	0.7	3.17148	-9.72222
2010-01-03	3	0.3	3.08653	-11.6667
2010-01-04	4	0.3	3.05821	-9.44444
2010-01-05	5	0.3	3.00158	-7.5
2010-01-06	6	0.5	2.97326	-6.11111
2010-01-07	7	0.7	2.88831	-3.33333
2010-01-08	8	0.6	2.86	-6.11111
2010-01-09	9	0.3	2.64196	-13.0556
2010-01-10	10	0.3	2.56267	-11.9444
2010-01-11	11	0.4	2.53435	-5.27778
2010-01-12	12	0.5	2.50321	-6.38889
2010-01-13	13	0.6	2.49471	-4.72222
2010-01-14	14	1	2.56833	0
2010-01-15	15	2.1	3.14316	3.33333
2010-01-16	16	2.7	3.65287	2.22222
2010-01-17	17	2.7	4.0493	2.22222
2010-01-18	18	2.9	4.53069	1.11111
2010-01-19	19	2.6	4.87049	-0.277778
2010-01-20	20	2.5	4.30415	-1.94444
2010-01-21	21	2.2	3.73782	-2.77778
2010-01-22	22	1.8	3.31307	-0.555556
2010-01-23	23	1.7	3.11485	-1.94444
2010-01-24	24	2.7	3.48297	5.27778
2010-01-25	25	4.5	14.3283	6.66667
2010-01-26	26	3	13.5354	-0.555556
2010-01-27	27	2.1	7.33405	-2.77778
2010-01-28	28	1.2	4.98376	-6.66667
2010-01-29	29	0.5	3.76613	-12.7778
2010-01-30	30	0.4	3.31307	-15.2778
2010-01-31	31	0.5	3.17148	-11.9444
2010-02-01	32	0.7	3.14316	-6.11111
2010-02-02	33	0.8	3.05821	-6.11111
2010-02-03	34	1	3.0299	-3.33333
2010-02-04	35	1.1	2.97326	-6.94444
2010-02-05	36	1.2	2.91663	-4.16667
2010-02-06	37	0.8	2.82318	-10.5556
2010-02-07	38	0.6	2.67594	-10.5556
2010-02-08	39	0.8	2.63346	-5.83333
2010-02-09	40	1.2	2.6193	-5
2010-02-10	41	1.5	2.61364	-3.05556
2010-02-11	42	1.4	2.56267	-5.83333
2010-02-12	43	1.3	2.54285	-4.16667
2010-02-13	44	1.4	2.53152	-6.38889
2010-02-14	45	1.7	2.54851	-2.5
2010-02-15	46	2	2.52869	-1.66667
2010-02-16	47	2.1	2.57117	-3.33333
2010-02-17	48	2.1	2.61364	-1.94444
2010-02-18	49	2.1	2.70425	-0.833333
2010-02-19	50	2.5	2.83168	0.277778
2010-02-20	51	2.9	2.88831	-0.277778
2010-02-21	52	3	2.94495	-2.77778
2010-02-22	53	2.1	2.86	-4.44444
2010-02-23	54	2.6	3.25643	1.11111
2010-02-24	55	3	3.31307	-0.277778
2010-02-25	56	2.5	3.34138	-3.33333
2010-02-26	57	0.8	2.97326	-3.33333
2010-02-27	58	1.6	3.5396	-0.277778
2010-02-28	59	2.3	4.0493	0.833333
2010-03-01	60	3	4.36079	1.66667
2010-03-02	61	3.6	5.04039	1.38889
2010-03-03	62	3.8	5.55009	0.555556
2010-03-04	63	3.3	5.83326	0.277778
2010-03-05	64	3.2	5.46514	-1.11111
2010-03-06	65	3.2	5.18197	-0.833333
2010-03-07	66	4	5.71999	3.33333
2010-03-08	67	4.5	7.90039	4.72222
2010-03-09	68	4.4	11.3267	4.16667
2010-03-10	69	4.3	12.5727	4.72222
2010-03-11	70	5.5	13.7336	10.5556
2010-03-12	71	6.1	16.4521	8.88889
2010-03-13	72	6	14.0168	5.27778
2010-03-14	73	5.2	22.9083	3.33333
2010-03-15	74	5.4	18.321	4.72222
2010-03-16	75	6	13.3372	5.55556
2010-03-17	76	7	8.29682	7.5
2010-03-18	77	8.3	6.85267	9.72222
2010-03-19	78	9.3	5.83326	11.1111
2010-03-20	79	9.3	5.18197	6.38889
2010-03-21	80	8.4	4.64396	3.88889
2010-03-22	81	7.4	5.52178	2.77778
2010-03-23	82	6.1	16.7919	2.5
2010-03-24	83	6.3	19.6519	6.11111
2010-03-25	84	6.9	13.677	5.83333
2010-03-26	85	5.6	7.56059	-2.77778
2010-03-27	86	5	6.00316	0.555556
2010-03-28	87	6.1	5.88989	7.5
2010-03-29	88	7.1	7.61722	5.27778
2010-03-30	89	6.6	6.2297	3.61111
2010-03-31	90	8	5.32356	8.61111
2010-04-01	91	9.8	4.75722	14.7222
2010-04-02	92	12.5	4.33247	20.2778
2010-04-03	93	14.3	4.0493	21.3889
2010-04-04	94	14	3.79445	13.0556
2010-04-05	95	13.5	3.62455	15.5556
2010-04-06	96	12.9	4.89881	13.0556
2010-04-07	97	12.8	6.17306	17.5
2010-04-08	98	13.9	5.57841	16.1111
2010-04-09	99	11.5	5.18197	4.16667
2010-04-10	100	9.9	4.33247	7.77778
2010-04-11	101	11.9	3.79445	11.6667
2010-04-12	102	12.2	3.5396	6.94444
2010-04-13	103	12.3	3.34138	8.88889
2010-04-14	104	12	3.22812	8.61111
2010-04-15	105	12.7	3.14316	13.0556
2010-04-16	106	13.4	3.1998	14.7222
2010-04-17	107	11.4	3.3697	5.27778
2010-04-18	108	10.5	3.34138	7.77778
2010-04-19	109	11.5	3.34138	9.44444
2010-04-20	110	12.5	3.14316	10
2010-04-21	111	13.1	2.97326	11.6667
2010-04-22	112	12.4	2.83168	6.66667
2010-04-23	113	11.6	2.67311	7.22222
2010-04-24	114	11.8	2.08978	10.8333
2010-04-25	115	12	2.29649	10.8333
2010-04-26	116	11.7	4.07762	10.5556
2010-04-27	117	11	3.7095	5
2010-04-28	118	11	2.97326	8.33333
2010-04-29	119	11.6	2.44374	10.8333
2010-04-30	120	13.7	2.20588	17.2222
2010-05-01	121	15.9	2.15774	21.1111
2010-05-02	122	16.7	2.21721	21.1111
2010-05-03	123	17.8	2.2342	18.8889
2010-05-04	124	16.7	2.60515	15.2778
2010-05-05	125	16.5	2.32764	18.0556
2010-05-06	126	16.3	6.93762	11.3889
2010-05-07	127	14.1	3.7095	9.16667
2010-05-08	128	12.3	5.80494	7.22222
2010-05-09	129	9.9	3.99267	4.16667
2010-05-10	130	9.9	3.1998	6.38889
2010-05-11	131	10	2.86	6.11111
2010-05-12	132	9.9	3.39802	7.22222
2010-05-13	133	10	3.22812	7.77778
2010-05-14	134	12.6	6.00316	16.6667
2010-05-15	135	13.7	4.07762	11.6667
2010-05-16	136	14.2	3.0299	13.8889
2010-05-17	137	14	2.55701	13.3333
2010-05-18	138	13.5	2.54851	13.3333
2010-05-19	139	14.1	2.97326	16.3889
2010-05-20	140	15.7	2.4579	18.0556
2010-05-21	141	17	2.27667	18.3333
2010-05-22	142	17.6	2.14075	21.6667
2010-05-23	143	17.9	1.96519	21.3889
2010-05-24	144	18.6	1.86325	21.3889
2010-05-25	145	19.5	1.73299	21.9444
2010-05-26	146	20.1	1.64804	23.3333
2010-05-27	147	20.5	1.54893	23.3333
2010-05-28	148	19.6	1.43849	20
2010-05-29	149	18.8	1.40451	18.3333
2010-05-30	150	19	1.28558	20.5556
2010-05-31	151	20.1	1.3677	22.5
2010-06-01	152	20.2	3.05821	20.2778
2010-06-02	153	19.8	1.96802	20.8333
2010-06-03	154	19.5	2.64479	20.5556
2010-06-04	155	19.4	1.84059	20
2010-06-05	156	19.8	5.77663	22.2222
2010-06-06	157	17.9	16.7635	14.7222
2010-06-07	158	16.7	8.94811	14.7222
2010-06-08	159	16.4	4.3891	13.8889
2010-06-09	160	15.3	3.42633	13.6111
2010-06-10	161	15.5	3.1998	15.8333
2010-06-11	162	16.1	2.70425	17.7778
2010-06-12	163	17.2	2.32481	21.3889
2010-06-13	164	17.4	2.50887	18.6111
2010-06-14	165	17.7	2.11526	20
2010-06-15	166	17.7	1.97368	17.7778
2010-06-16	167	18.2	7.16415	20.8333
2010-06-17	168	18.4	4.36079	18.6111
2010-06-18	169	18.4	3.05821	20
2010-06-19	170	19.1	2.33897	23.6111
2010-06-20	171	20.3	1.95103	22.7778
2010-06-21	172	20.2	1.72732	21.1111
2010-06-22	173	19.7	3.39802	21.3889
[truncated: 2,749 more rows]
